# Supplementary material for: Genetic Determinants of Plasma Low-Density Lipoprotein Cholesterol Levels: Monogenicity, Polygenicity, and “Missing” Heritability
Source: MDPI journal article supplement (doi:10.3390/biomedicines9111728), 2021-11-19
Supplement: s1 [file s1]

## Supplementary material for **Genetic Determinants of Plasma Low-Density Lipoprotein Cholesterol Levels: Monogenicity, Polygenicity, and “Missing” Heritability.**

### **Supplementary methods**

**Search for GWASs related to plasma LDL-c levels:** The GWAS Catalog ([www.ebi.ac.uk/gwas](http://www.ebi.ac.uk/gwas)) was accessed on August 18, 2021. After a search for the trait “low-density lipoprotein cholesterol measurement” (EFO\_0004611), two .csv files were downloaded: a file with the published studies included in the database (study file) and a file with the SNVs associated with the trait in these studies (association file). The first step was to filter the “reported trait” field of the study file using “Low-density lipoprotein cholesterol levels”, “LDL cholesterol”, “LDL cholesterol levels”, “Total cholesterol levels in LDL”, “Lipid traits”, “Cardiovascular disease risk factors”, “Metabolite levels”, “Cholesterol”, “Lipid or lipoprotein levels”, “Quantitative traits”, “Biochemical measures”, or “Cardiovascular risk factors.” The next step was to choose discovery samples from the following groups: Europeans or European ancestry, East Asians, Afro-Americans or African ancestry, Native Americans or Hispanics, Middle-East populations, and Oceanians. Studies of multiethnic discovery samples were discarded. Studies with consigned background traits (usually a disease) were also discarded. The selected studies were used to extract SNVs associated with LDL-c in the association file. All the SNV were checked through the dbSNP ([www.ncbi.nlm.nih.gov/snp](http://www.ncbi.nlm.nih.gov/snp)) and the ClinVar ([www.ncbi.nlm.nih.gov/clinvar](http://www.ncbi.nlm.nih.gov/clinvar)) databases to determine the type of mutation. Polyphen ([genetics.bwh.harvard.edu/pph2/](http://genetics.bwh.harvard.edu/pph2/)) and Sift ([sift.bii.a-star.edu.sg/](http://sift.bii.a-star.edu.sg/)) programs were used for the prediction of the functional effects of SNVs affecting exons.

**Table S1a:** SNVs associated with low-density lipoprotein cholesterol in European ancestry populations.

| Mapped gene <sup>a</sup>    | Region | SNPid <sup>b</sup> | Chr | Position <sup>c</sup> | LD <sup>d</sup> | Type <sup>e</sup> | cDNA      | Protein    | ClinVar <sup>f</sup> | Polyphen <sup>g</sup> | Sift <sup>h</sup> | p-value                   | References   |
|-----------------------------|--------|--------------------|-----|-----------------------|-----------------|-------------------|-----------|------------|----------------------|-----------------------|-------------------|---------------------------|--------------|
| <i>SKI</i>                  |        | rs560221037        | 1   | 2,235,046             |                 | intronic          |           |            |                      |                       |                   | 6E-12                     | [22]         |
| <i>TTC34 - ACTRT2</i>       |        | rs79316815         | 1   | 2,902,742             |                 | intergenic        |           |            |                      |                       |                   | 3E-7                      | [17]         |
| <i>CASZ1</i>                |        | rs880315           | 1   | 10,736,809            |                 | intronic          |           |            |                      |                       |                   | 7E-12                     | [21]         |
| <i>CASZ1</i>                |        | rs682178           | 1   | 10,738,495            |                 | intronic          |           |            |                      |                       |                   | 5E-10                     | [22]         |
| <i>CLCN6</i>                |        | rs112521149        | 1   | 11,829,758            |                 | intronic          |           |            |                      |                       |                   | 4E-8                      | [22]         |
| <i>EPHA2 - ARHGEF19-AS1</i> |        | rs12078100         | 1   | 16,186,091            |                 | intergenic        |           |            |                      |                       |                   | 7E-13;<br>9E-10;<br>2E-24 | [20][21][22] |
| <i>ASAP3</i>                |        | rs61778883         | 1   | 23,468,684            |                 | intronic          |           |            |                      |                       |                   | 2E-9                      | [21]         |
| <i>ASAP3</i>                |        | rs375390883        | 1   | 23,468,691            |                 | intronic          |           |            |                      |                       |                   | 3E-17                     | [22]         |
| <i>ELOA</i>                 |        | chr1:23747996      | 1   | 23,747,996            |                 | intergenic        |           |            |                      |                       |                   | 4E-9                      | [20]         |
|                             |        |                    | 1   | 25,420,739            |                 | missense          | c.48G>C   | p.Trp16Cys | no interp.           | benign                | tolerated         | 4E-9                      | [13]         |
|                             |        |                    | 1   | 25,442,719            |                 | intronic          |           |            |                      |                       |                   | 4E-36                     | [20]         |
|                             |        |                    | 1   | 25,449,242            |                 | intronic          |           |            |                      |                       |                   | 1E-10;<br>2E-14           | [8][12]      |
|                             |        |                    | 1   | 25,467,172            |                 | intronic          |           |            |                      |                       |                   | 2E-35                     | [21]         |
| <i>ARID1A</i>               |        | rs114165349        | 1   | 26,695,422            |                 | intronic          |           |            |                      |                       |                   | 4E-27;<br>8E-16           | [20][21]     |
| <i>PIGV - RN7SL165P</i>     |        | rs12748152         | 1   | 26,811,902            |                 | intergenic        |           |            |                      |                       |                   | 3E-12                     | [12]         |
| <i>KDF1</i>                 |        | rs79598313         | 1   | 26,958,422            |                 | intronic          |           |            |                      |                       |                   | 7E-10                     | [13]         |
| <i>MECR</i>                 |        | rs2291609          | 1   | 29,224,479            |                 | intronic          |           |            |                      |                       |                   | 2E-8                      | [20]         |
|                             |        |                    | 1   | 54,646,717            |                 | intergenic        |           |            |                      |                       |                   | 1E-7                      | [15]         |
|                             |        |                    | 1   | 54,876,728            |                 | intronic          |           |            |                      |                       |                   | 2E-9                      | [15]         |
|                             |        |                    | 1   | 54,983,266            |                 | intronic          |           |            |                      |                       |                   | 3E-9                      | [15]         |
|                             |        |                    | 1   | 55,030,366            |                 | intergenic        |           |            |                      |                       |                   | 4E-11;<br>4E-8;<br>1E-10  | [1][4][9]    |
|                             |        |                    | 1   | 55,038,977            |                 | 5'-UTR            | c.-861G>A |            | benign               |                       |                   | 2E-28;<br>3E-50           | [8][12]      |

| Mapped gene <sup>a</sup> | Region                 | SNPId <sup>b</sup> | Chr | Position <sup>c</sup> | LD <sup>d</sup> | Type <sup>e</sup> | cDNA       | Protein    | ClinVar <sup>f</sup> | Polyphen <sup>g</sup> | Sift <sup>h</sup> | p-value                               | References          |
|--------------------------|------------------------|--------------------|-----|-----------------------|-----------------|-------------------|------------|------------|----------------------|-----------------------|-------------------|---------------------------------------|---------------------|
| <i>PCSK9</i>             | <i>PCSK9</i>           | rs11591147         | 1   | 55,039,974            |                 | missense          | c.137G>T   | p.Arg46Leu | benign/likely benign | benign                | tolerated         | 2E-44;<br>2E-92;<br>3E-563;<br>2E-421 | [2][13][20]<br>[21] |
| <i>PCSK9</i>             |                        | rs693668           | 1   | 55,055,436            |                 | intronic          |            |            |                      |                       |                   | 9E-8                                  | [19]                |
| <i>PCSK9</i>             |                        | rs472495           | 1   | 55,055,640            |                 | intronic          |            |            |                      |                       |                   | 6E-85                                 | [21]                |
| <i>PCSK9</i>             |                        | rs11206517         | 1   | 55,060,755            |                 | intronic          |            |            |                      |                       |                   | 6E-32                                 | [21]                |
| <i>USP24 - Y_RNA</i>     |                        | chr1:55246601      | 1   | 55,246,601            |                 | intergenic        |            |            |                      |                       |                   | 4E-16                                 | [15]                |
| <i>USP24 - Y_RNA</i>     |                        | chr1:55505647      | 1   | 55,505,647            |                 | intergenic        |            |            |                      |                       |                   | 1E-29                                 | [15]                |
| <i>USP24 - Y_RNA</i>     |                        | chr1:55636240      | 1   | 55,636,240            |                 | intergenic        |            |            |                      |                       |                   | 6E-25                                 | [15]                |
| <i>USP24 - Y_RNA</i>     |                        | chr1:55759138      | 1   | 55,759,138            |                 | intergenic        |            |            |                      |                       |                   | 8E-21                                 | [15]                |
| <i>USP24 - Y_RNA</i>     |                        | chr1:55939497      | 1   | 55,939,497            |                 | intergenic        |            |            |                      |                       |                   | 2E-18                                 | [15]                |
| <i>USP24 - Y_RNA</i>     |                        | chr1:56062375      | 1   | 56,062,375            |                 | intergenic        |            |            |                      |                       |                   | 3E-17                                 | [15]                |
| <i>ENSG00000284686</i>   |                        | rs17457613         | 1   | 56,250,181            |                 | intronic          |            |            |                      |                       |                   | 2E-9                                  | [20]                |
| <i>ENSG00000284686</i>   |                        | chr1:56304721      | 1   | 56,304,721            |                 | intronic          |            |            |                      |                       |                   | 2E-15                                 | [15]                |
| <i>ENSG00000284686</i>   |                        | rs11206788         | 1   | 56,332,309            |                 | intronic          |            |            |                      |                       |                   | 2E-10                                 | [21]                |
| <i>ENSG00000284686</i>   |                        | chr1:56480207      | 1   | 56,480,207            |                 | intronic          |            |            |                      |                       |                   | 2E-15                                 | [15]                |
| <i>FYB2 - C8A</i>        |                        | chr1:56840574      | 1   | 56,840,574            |                 | intergenic        |            |            |                      |                       |                   | 3E-14                                 | [15]                |
| <i>DAB1</i>              |                        | chr1:56995693      | 1   | 56,995,693            |                 | 3'-UTR            | c.*2451C>? |            |                      |                       |                   | 5E-9                                  | [15]                |
| <i>DOCK7</i>             | <i>DOCK7 - ANGPTL3</i> | rs2131925          | 1   | 62,560,271            |                 | intronic          |            |            |                      |                       |                   | 3E-18;<br>3E-32                       | [8][12]             |
| <i>DOCK7</i>             |                        | rs10889348         | 1   | 62,612,551            |                 | intronic          |            |            |                      |                       |                   | 2E-11                                 | [13]                |
| <i>DOCK7</i>             |                        | rs10889353         | 1   | 62,652,525            |                 | intronic          |            |            |                      |                       |                   | 8E-6                                  | [5]                 |
| <i>DOCK7</i>             |                        | rs1168127          | 1   | 62,670,407            |                 | intronic          |            |            |                      |                       |                   | 2E-70                                 | [21]                |
| <i>ATG4C - FOXD3</i>     |                        | chr1:62900811      | 1   | 62,900,811            |                 | intergenic        |            |            |                      |                       |                   | 2E-6                                  | [15]                |
| <i>ATG4C - FOXD3</i>     |                        | chr1:62944947      | 1   | 62,944,947            |                 | intergenic        |            |            |                      |                       |                   | 5E-101                                | [20]                |
| <i>ATG4C - FOXD3</i>     |                        | chr1:63086001      | 1   | 63,086,001            |                 | intergenic        |            |            |                      |                       |                   | 4E-6                                  | [15]                |
| <i>GFI1 - EVI5</i>       |                        | rs11164654         | 1   | 92,502,755            |                 | intergenic        |            |            |                      |                       |                   | 2E-8                                  | [13]                |
| <i>EVI5</i>              |                        | rs1556562          | 1   | 92,568,466            |                 | intronic          |            |            |                      |                       |                   | 2E-12;<br>2E-14                       | [20][21]            |
| <i>Y_RNA - PRMT6</i>     |                        | rs3108680          | 1   | 107,030,375           |                 | intergenic        |            |            |                      |                       |                   | 2E-9                                  | [20]                |

| Mapped gene <sup>a</sup> | Region | SNPid <sup>b</sup> | Chr | Position <sup>c</sup> | LD <sup>d</sup> | Type <sup>e</sup> | cDNA       | Protein     | ClinVar <sup>f</sup> | Polyphen <sup>g</sup> | Sift <sup>h</sup> | p-value                             | References    |
|--------------------------|--------|--------------------|-----|-----------------------|-----------------|-------------------|------------|-------------|----------------------|-----------------------|-------------------|-------------------------------------|---------------|
|                          |        |                    | 1   | 108,925,836           |                 | intronic          |            |             |                      |                       |                   | 6E-10                               | [21]          |
|                          |        |                    | 1   | 109,233,663           |                 | intronic          |            |             |                      |                       |                   | 8E-304                              | [22]          |
|                          |        |                    | 1   | 109,255,141           |                 | intronic          |            |             |                      |                       |                   | 3E-40                               | [21]          |
|                          |        |                    | 1   | 109,264,661           |                 | intronic          |            |             |                      |                       |                   | 1E-277                              | [20]          |
|                          |        |                    | 1   | 109,272,258           |                 | intronic          |            |             |                      |                       |                   | 2E-336                              | [21]          |
|                          |        |                    | 1   | 109,274,968           |                 | 3'-UTR            | c.*919G>T  |             | association          |                       |                   | 2E-42                               | [4]           |
|                          |        |                    | 1   | 109,275,216           |                 | 3'-UTR            | c.*1167T>C |             | np                   |                       |                   | 1E-26                               | [9]           |
|                          |        |                    | 1   | 109,275,684           |                 | 3'-UTR            | c.*1635G>C |             | np                   |                       |                   | 1E-170;<br>5E-241;<br>2E-72         | [8][12][19]   |
|                          |        |                    | 1   | 109,275,908           |                 | intergenic        |            |             |                      |                       |                   | 3E-29;<br>8E-23;<br>2E-12;<br>2E-91 | [2][5][6][13] |
|                          |        |                    | 1   | 109,279,544           |                 | intergenic        |            |             |                      |                       |                   | 6E-33;<br>1E-33                     | [1][3]        |
|                          |        |                    | 1   | 109,519,352           |                 | intergenic        |            |             |                      |                       |                   | 7E-11                               | [21]          |
|                          |        |                    | 1   | 109,690,361           |                 | missense          | c.451A>G   | p.Asn151Asp | np                   | benign                | tolerated         | 6E-10                               | [21]          |
|                          |        |                    | 1   | 109,817,590           |                 | intergenic        |            |             |                      |                       |                   | 4E-15                               | [15]          |
| CIART                    |        | rs2147324          | 1   | 150,283,177           |                 | intronic          |            |             |                      |                       |                   | 3E-8                                | [20]          |
| TARS2                    |        | rs77257036         | 1   | 150,503,710           |                 | intronic          |            |             |                      |                       |                   | 4E-8                                | [21]          |
| ANXA9                    |        | rs267733           | 1   | 150,986,360           |                 | missense          | c.497A>G   | p.Asp166Gly | np                   | probably<br>damaging  | tolerated         | 5E-9                                | [12]          |
| Y_RNA - EFNA1            |        | rs11807418         | 1   | 155,122,129           |                 | intergenic        |            |             |                      |                       |                   | 4E-8                                | [20]          |
| EFNA1                    |        | rs4745             | 1   | 155,133,751           |                 | missense          | c.476A>T   | p.Asp159Val | np                   | benign                | tolerated         | 3E-10                               | [16]          |
| LAMC21 - LAMC2           |        | rs35221132         | 1   | 183,145,730           |                 | intergenic        |            |             |                      |                       |                   | 8E-9                                | [20]          |
| PTPRC - LINC01221        |        | chr1:198994696     | 1   | 198,994,696           |                 | intergenic        |            |             |                      |                       |                   | 2E-9                                | [20]          |
| LINC01221                |        | rs6667939          | 1   | 199,025,490           |                 | intergenic        |            |             |                      |                       |                   | 7E-11                               | [21]          |
| CR1L                     |        | rs4844614          | 1   | 207,701,830           |                 | intronic          |            |             |                      |                       |                   | 2E-7                                | [6]           |
|                          |        |                    | 1   | 220,796,686           |                 | missense          | c.493A>G   | p.Thr165Ala | np                   | benign                | tolerated         | 3E-33;<br>8E-29                     | [20][21]      |

| Mapped gene <sup>a</sup>  | Region         | SNPid <sup>b</sup> | Chr | Position <sup>c</sup> | LD <sup>d</sup> | Type <sup>e</sup> | cDNA      | Protein    | ClinVar <sup>f</sup>    | Polyphen <sup>g</sup> | Sift <sup>h</sup> | p-value                     | References      |
|---------------------------|----------------|--------------------|-----|-----------------------|-----------------|-------------------|-----------|------------|-------------------------|-----------------------|-------------------|-----------------------------|-----------------|
| <i>MTARC1</i>             | <i>MTARC1</i>  | rs2642442          | 1   | 220,800,221           |                 | intronic          |           |            |                         |                       |                   | 6E-11;<br>5E-11             | [8][12]         |
| <i>CNIH4, NVL</i>         |                | rs12751807         | 1   | 224,349,953           |                 | intergenic        |           |            |                         |                       |                   | 1E-9                        | [20]            |
| <i>IRF2BP2 - TOMM20</i>   | <i>IRF2BP2</i> | rs10910476         | 1   | 234,599,210           |                 | intergenic        |           |            |                         |                       |                   | 4E-9                        | [21]            |
| <i>IRF2BP2 - TOMM20</i>   |                | rs556107           | 1   | 234,717,312           |                 | intergenic        |           |            |                         |                       |                   | 1E-70;<br>8E-64             | [20][21]        |
| <i>IRF2BP2 - TOMM20</i>   |                | rs514230           | 1   | 234,722,850           |                 | intergenic        |           |            |                         |                       |                   | 9E-12;<br>9E-12;<br>1E-11   | [8][12][13]     |
| <i>IRF2BP2 - TOMM20</i>   |                | rs28631087         | 1   | 234,973,467           |                 | intergenic        |           |            |                         |                       |                   | 2E-10                       | [21]            |
| <i>RPS7, COLEC11</i>      |                | rs56236159         | 2   | 3,588,888             |                 | intergenic        |           |            |                         |                       |                   | 7E-9                        | [21]            |
| <i>COLEC11, RPS7</i>      |                | rs6542680          | 2   | 3,592,552             |                 | intergenic        |           |            |                         |                       |                   | 1E-9                        | [20]            |
| <i>COLEC11, RPS7</i>      |                | rs3820897          | 2   | 3,594,771             |                 | intergenic        |           |            |                         |                       |                   | 2E-14                       | [22]            |
| <i>LINC01814</i>          |                | rs72784625         | 2   | 8,580,520             |                 | intergenic        |           |            |                         |                       |                   | 6E-9                        | [22]            |
| <i>LINC00570</i>          |                | rs72774870         | 2   | 11,372,699            |                 | intergenic        |           |            |                         |                       |                   | 4E-8                        | [21]            |
| <i>RN7SL140P, RPS16P2</i> | <i>APOB</i>    | rs907866           | 2   | 20,171,619            |                 | intergenic        |           |            |                         |                       |                   | 4E-17                       | [21]            |
| <i>LDAH</i>               |                | rs4971516          | 2   | 20,703,255            |                 | intronic          |           |            |                         |                       |                   | 2E-52                       | [10]            |
| <i>APOB</i>               |                | rs13392272         | 2   | 20,994,618            |                 | intergenic        |           |            |                         |                       |                   | 1E-306                      | [20]            |
| <i>APOB</i>               |                | rs693              | 2   | 21,009,323            |                 | synonymous        | c.7545C>T | p.Thr2515= | benign                  |                       |                   | 1E-21;<br>4E-17;<br>3E-11   | [2][5][6]       |
| <i>APOB</i>               |                | rs1367117          | 2   | 21,041,028            |                 | missense          | c.293C>T  | p.Thr98Ile | benign/likely<br>benign | benign                | deleterious       | 4E-114;<br>1E-182<br>9E-312 | [8][12]<br>[21] |
| <i>TDRD15, APOB</i>       |                | rs934197           | 2   | 21,044,589            |                 | intergenic        |           |            |                         |                       |                   | 4E-28                       | [19]            |
| <i>TDRD15, APOB</i>       |                | rs7575840          | 2   | 21,050,618            |                 | intergenic        |           |            |                         |                       |                   | 5E-29;<br>2E-20;<br>2E-63   | [4][9][13]      |
| <i>APOB, TDRD15</i>       |                | rs515135           | 2   | 21,063,185            |                 | intergenic        |           |            |                         |                       |                   | 6E-22;<br>1E-9              | [1][3]          |
| <i>APOB, TDRD15</i>       |                | rs562338           | 2   | 21,065,449            |                 | intergenic        |           |            |                         |                       |                   | 5E-324                      | [22]            |
| <i>TDRD15 - NUTF2P8</i>   |                | rs312976           | 2   | 21,152,474            |                 | intergenic        |           |            |                         |                       |                   | 2E-103                      | [21]            |
| <i>TDRD15 - NUTF2P8</i>   |                | rs430096           | 2   | 21,211,708            |                 | intergenic        |           |            |                         |                       |                   | 8E-13                       | [15]            |
| <i>TDRD15 - NUTF2P8</i>   |                | chr2:21281097      | 2   | 21,281,097            |                 | intergenic        |           |            |                         |                       |                   |                             |                 |

| Mapped gene <sup>a</sup> | Region         | SNP <sup>id</sup> <sup>b</sup> | Chr | Position <sup>c</sup> | LD <sup>d</sup> | Type <sup>e</sup> | cDNA      | Protein     | ClinVar <sup>f</sup>    | Polyphen <sup>g</sup> | Sift <sup>h</sup> | p-value                               | References          |
|--------------------------|----------------|--------------------------------|-----|-----------------------|-----------------|-------------------|-----------|-------------|-------------------------|-----------------------|-------------------|---------------------------------------|---------------------|
| <i>TDRD15 - NUTF2P8</i>  | <i>APOB</i>    | chr2:21383353                  | 2   | 21,383,353            |                 | intergenic        |           |             |                         |                       |                   | 4E-10                                 | [15]                |
| <i>TDRD15 - NUTF2P8</i>  |                | rs11693526                     | 2   | 22,124,628            |                 | intergenic        |           |             |                         |                       |                   | 2E-8;<br>7E-6                         | [20][21]            |
| <i>ITSN2</i>             |                | rs77907512                     | 2   | 24,267,100            |                 | intronic          |           |             |                         |                       |                   | 5E-11                                 | [20]                |
| <i>KCNK3</i>             |                | rs1731243                      | 2   | 26,707,543            |                 | intronic          |           |             |                         |                       |                   | 7E-10                                 | [21]                |
| <i>GCKR</i>              | <i>GCKR</i>    | rs1260326                      | 2   | 27,508,073            |                 | missense          | c.1337T>C | p.Leu446Pro | benign,<br>association  | possibly<br>damaging  | tolerated         | 4E-99;<br>6E-60                       | [20][21]            |
| <i>THADA</i>             | <i>ABCG5/8</i> | rs12990177                     | 2   | 43,455,520            |                 | intronic          |           |             |                         |                       |                   | 1E-12                                 | [21]                |
| <i>ABCG5</i>             |                | rs6756629                      | 2   | 43,837,951            |                 | missense          | c.148C>T  | p.Arg50Cys  | benign/likely<br>benign | probably<br>damaging  | deleterious       | 3E-10                                 | [5]                 |
| <i>ABCG8</i>             |                | rs4299376                      | 2   | 43,845,437            |                 | intronic          |           |             |                         |                       |                   | 2E-47;<br>4E-72;<br>5E-187;<br>4E-131 | [8][12][20]<br>[21] |
| <i>ABCG8</i>             |                | rs41360247                     | 2   | 43,846,517            |                 | intronic          |           |             |                         |                       |                   | 1E-10                                 | [19]                |
| <i>ABCG8</i>             |                | rs6544713                      | 2   | 43,846,742            |                 | intronic          |           |             |                         |                       |                   | 2E-20                                 | [4]                 |
| <i>ABCG8</i>             |                | rs72875462                     | 2   | 43,852,171            |                 | intronic          |           |             |                         |                       |                   | 2E-35                                 | [13]                |
| <i>ABCG8</i>             |                | rs6709904                      | 2   | 43,853,185            |                 | intronic          |           |             |                         |                       |                   | 9E-40                                 | [21]                |
| <i>EHBP1</i>             |                | rs4671050                      | 2   | 62,761,034            |                 | intronic          |           |             |                         |                       |                   | 1E-21                                 | [20]                |
| <i>EHBP1</i>             |                | rs7562734                      | 2   | 62,820,838            |                 | intronic          |           |             |                         |                       |                   | 2E-19                                 | [21]                |
| <i>EHBP1</i>             |                | rs2710642                      | 2   | 62,922,422            |                 | intronic          |           |             |                         |                       |                   | 6E-9                                  | [12]                |
| <i>SERTAD2</i>           |                | rs1861398                      | 2   | 64,679,666            |                 | intronic          |           |             |                         |                       |                   | 8E-9                                  | [20]                |
| <i>SERTAD2</i>           |                | rs12471768                     | 2   | 64,701,469            |                 | intronic          |           |             |                         |                       |                   | 3E-9                                  | [21]                |
| <i>GCC2</i>              |                | rs763102966                    | 2   | 108,449,778           |                 | intronic          |           |             |                         |                       |                   | 1E-12                                 | [20]                |
| <i>LIMS1</i>             |                | rs2718717                      | 2   | 108,589,683           |                 | intronic          |           |             |                         |                       |                   | 3E-10                                 | [21]                |
| <i>IL1F10</i>            |                | rs3811055                      | 2   | 113,073,605           |                 | intronic          |           |             |                         |                       |                   | 2E-8                                  | [20]                |
| <i>INSIG2, RN7SL111P</i> | <i>INSIG2</i>  | rs10490626                     | 2   | 118,078,265           |                 | intergenic        |           |             |                         |                       |                   | 2E-12                                 | [12]                |
| <i>RN7SL111P, INSIG2</i> |                | rs150474434                    | 2   | 118,087,545           |                 | intergenic        |           |             |                         |                       |                   | 7E-22;<br>1E-23                       | [20][21]            |
| <i>LINC01101</i>         |                | rs17050272                     | 2   | 120,548,864           |                 | intergenic        |           |             |                         |                       |                   | 2E-24;<br>3E-22                       | [20][21]            |
| <i>Y_RNA, LINC01101</i>  |                | rs2030746                      | 2   | 120,551,912           |                 | intergenic        |           |             |                         |                       |                   | 9E-9                                  | [12]                |
| <i>TMEM163</i>           |                | rs10928512                     | 2   | 134,693,732           |                 | intronic          |           |             |                         |                       |                   | 4E-8                                  | [19]                |

| Mapped gene <sup>a</sup>                                                       | Region       | SNPId <sup>b</sup> | Chr | Position <sup>c</sup> | LD <sup>d</sup> | Type <sup>e</sup> | cDNA      | Protein     | ClinVar <sup>f</sup> | Polyphen <sup>g</sup> | Sift <sup>h</sup> | p-value                   | References   |
|--------------------------------------------------------------------------------|--------------|--------------------|-----|-----------------------|-----------------|-------------------|-----------|-------------|----------------------|-----------------------|-------------------|---------------------------|--------------|
| <i>ACMSD, CCNT2-AS1</i>                                                        |              | rs4954192          | 2   | 134,875,411           |                 | intronic          |           |             |                      |                       |                   | 6E-12                     | [21]         |
| <i>ZRANB3</i>                                                                  |              | rs151022760        | 2   | 135,340,991           |                 | intronic          |           |             |                      |                       |                   | 4E-12                     | [20]         |
| <i>DARS1-AS1, CXCR4</i>                                                        |              | rs6714750          | 2   | 136,025,599           |                 | intergenic        |           |             |                      |                       |                   | 3E-8                      | [21]         |
| <i>ACVR1C</i>                                                                  |              | rs12614487         | 2   | 157,578,057           |                 | intronic          |           |             |                      |                       |                   | 5E-10                     | [20]         |
| <i>ACVR1C</i>                                                                  |              | rs7601153          | 2   | 157,591,059           |                 | intronic          |           |             |                      |                       |                   | 2E-7                      | [21]         |
| <i>GRB14, COBLL1</i>                                                           |              | rs10184004         | 2   | 164,651,879           |                 | intergenic        |           |             |                      |                       |                   | 1E-11                     | [20]         |
| <i>ABCB11</i>                                                                  |              | rs2287622          | 2   | 168,973,818           |                 | missense          | c.1331T>C | p.Val444Ala | benign               | benign                | tolerated         | 3E-23                     | [21]         |
| <i>UBR3</i>                                                                    |              | chr2:169829810     | 2   | 169,829,810           |                 | intronic          |           |             |                      |                       |                   | 8E-24                     | [20]         |
| <i>FAM117B</i>                                                                 |              | rs7569317          | 2   | 202,663,256           |                 | intronic          |           |             |                      |                       |                   | 9E-18                     | [21]         |
| <i>CARF</i>                                                                    |              | rs140244541        | 2   | 202,943,809           |                 | intronic          |           |             |                      |                       |                   | 6E-9                      | [13]         |
| <i>RAPH1</i>                                                                   |              | rs7603427          | 2   | 203,452,830           |                 | intronic          |           |             |                      |                       |                   | 9E-8                      | [21]         |
| <i>RAPH1 - CD28</i>                                                            |              | chr2:203556224     | 2   | 203,556,224           |                 | intergenic        |           |             |                      |                       |                   | 1E-24                     | [20]         |
| <i>FN1</i>                                                                     |              | rs1250258          | 2   | 215,435,462           |                 | intronic          |           |             |                      |                       |                   | 7E-9                      | [21]         |
| <i>FN1</i>                                                                     |              | rs1250229          | 2   | 215,439,661           |                 | intergenic        |           |             |                      |                       |                   | 3E-8                      | [12]         |
| <i>UGT1A3, UGT1A5, UGT1A9, UGT1A10, UGT1A4, UGT1A6, UGT1A8, UGT1A7</i>         |              | rs11568318         | 2   | 233,756,852           |                 | intronic          |           |             |                      |                       |                   | 7E-10;<br>7E-19           | [21][22]     |
| <i>UGT1A8, UGT1A9, UGT1A4, UGT1A7, UGT1A10, UGT1A6, UGT1A5, UGT1A1, UGT1A3</i> |              | rs11563251         | 2   | 233,770,738           |                 | intronic          |           |             |                      |                       |                   | 5E-8;<br>8E-13            | [12][20]     |
| <i>FARP2</i>                                                                   |              | rs59916403         | 2   | 241,431,336           |                 | intronic          |           |             |                      |                       |                   | 4E-9                      | [22]         |
| <i>GSTM5P1, PPARG</i>                                                          | <i>PPARG</i> | rs2920503          | 3   | 12,282,731            |                 | intergenic        |           |             |                      |                       |                   | 3E-10                     | [13]         |
| <i>GSTM5P1, PPARG</i>                                                          |              | rs13076933         | 3   | 12,285,932            |                 | intergenic        |           |             |                      |                       |                   | 6E-26;<br>3E-18;<br>8E-49 | [20][21][22] |
| <i>CMTM6</i>                                                                   |              | rs7640978          | 3   | 32,491,518            |                 | intronic          |           |             |                      |                       |                   | 1E-8                      | [12]         |
| <i>CMTM6</i>                                                                   |              | rs9834932          | 3   | 32,493,890            |                 | intronic          |           |             |                      |                       |                   | 1E-18                     | [21]         |

| Mapped gene <sup>a</sup>   | Region        | SNPId <sup>b</sup>          | Chr | Position <sup>c</sup> | LD <sup>d</sup> | Type <sup>e</sup> | cDNA      | Protein     | ClinVar <sup>f</sup> | Polyphen <sup>g</sup> | Sift <sup>h</sup> | p-value                   | References   |
|----------------------------|---------------|-----------------------------|-----|-----------------------|-----------------|-------------------|-----------|-------------|----------------------|-----------------------|-------------------|---------------------------|--------------|
| <i>CMTM6</i>               |               | rs150605723                 | 3   | 32,499,834            |                 | intronic          |           |             |                      |                       |                   | 2E-19                     | [20]         |
| <i>PXK</i>                 |               | rs9825431                   | 3   | 58,420,967            |                 | intronic          |           |             |                      |                       |                   | 4E-18                     | [20]         |
| <i>KCTD6, PDHB</i>         |               | rs71311871                  | 3   | 58,434,886            |                 | intergenic        |           |             |                      |                       |                   | 7E-14                     | [21]         |
| <i>MITF</i>                |               | rs55921103                  | 3   | 69,761,143            |                 | intronic          |           |             |                      |                       |                   | 3E-12;<br>5E-10           | [20][21]     |
| <i>MITF</i>                |               | rs7623486                   | 3   | 69,859,943            |                 | intronic          |           |             |                      |                       |                   | 9E-7                      | [17]         |
| <i>NR1I2</i>               |               | rs3732359                   | 3   | 119,817,582           |                 | 3'-UTR            | c.*370G>A |             | np                   |                       |                   | 5E-12                     | [21]         |
| <i>GSK3B</i>               |               | rs570238285                 | 3   | 120,069,666           |                 | intronic          |           |             |                      |                       |                   | 1E-8                      | [20]         |
| <i>CASR</i>                |               | chr3:122285218              | 3   | 122,285,218           |                 | 3'-UTR            | c.*27A>?  |             |                      |                       |                   | 1E-19                     | [20]         |
| <i>PARP9</i>               |               | rs9841897                   | 3   | 122,563,722           |                 | intronic          |           |             |                      |                       |                   | 1E-10                     | [21]         |
| <i>PLXND1</i>              |               | rs56299595                  | 3   | 129,559,339           |                 | intronic          |           |             |                      |                       |                   | 2E-8                      | [20]         |
| <i>DNAJC13</i>             |               | rs17404153                  | 3   | 132,444,356           |                 | intronic          |           |             |                      |                       |                   | 2E-9                      | [12]         |
| <i>DNAJC13</i>             |               | rs113177823                 | 3   | 132,498,859           |                 | intronic          |           |             |                      |                       |                   | 8E-20;<br>1E-18           | [20][21]     |
| <i>STAG1</i>               |               | rs28478252                  | 3   | 136,402,758           |                 | intronic          |           |             |                      |                       |                   | 4E-11                     | [20]         |
| <i>STAG1</i>               |               | rs3932048                   | 3   | 136,540,082           |                 | intronic          |           |             |                      |                       |                   | 6E-10                     | [21]         |
| <i>PAQR9, PCOLCE2</i>      |               | rs11709868                  | 3   | 142,930,002           |                 | intergenic        |           |             |                      |                       |                   | 4E-14                     | [20]         |
| <i>PCOLCE2, PAQR9</i>      |               | rs9832727                   | 3   | 142,930,268           |                 | intergenic        |           |             |                      |                       |                   | 2E-11;<br>3E-20           | [21][22]     |
| <i>ZIC4, RPL21P71</i>      |               | rs113270900                 | 3   | 147,316,110           |                 | intergenic        |           |             |                      |                       |                   | 1E-8                      | [22]         |
| <i>RPL32P8, TM4SF1-AS1</i> |               | rs7645585                   | 3   | 149,406,996           |                 | intergenic        |           |             |                      |                       |                   | 1E-8                      | [22]         |
| <i>SLC33A1</i>             |               | rs76440173<br>(rs138283229) | 3   | 155,828,335           |                 | missense          | c.1525G>A | p.Gly509Ser | conflicting          | probably<br>damaging  | deleterious       | 5E-9                      | [22]         |
| <i>IFT80</i>               |               | rs4616688                   | 3   | 160,324,671           |                 | intronic          |           |             |                      |                       |                   | 5E-13                     | [22]         |
| <i>TNIK, SLC2A2</i>        |               | rs6785233                   | 3   | 171,039,196           |                 | intergenic        |           |             |                      |                       |                   | 3E-8;<br>4E-15            | [20][22]     |
| <i>HGFAC</i>               | <i>LRPAP1</i> | rs13108218                  | 4   | 3,442,204             |                 | intronic          |           |             |                      |                       |                   | 2E-26;<br>2E-16;<br>1E-43 | [20][21][22] |
| <i>DOK7</i>                |               | rs6831256                   | 4   | 3,471,412             |                 | intronic          |           |             |                      |                       |                   | 2E-8                      | [12]         |
| <i>SORCS2</i>              |               | rs4689653                   | 4   | 7,221,592             |                 | intronic          |           |             |                      |                       |                   | 6E-14                     | [22]         |
| <i>SORCS2</i>              |               | rs576573069                 | 4   | 7,223,886             |                 | intronic          |           |             |                      |                       |                   | 3E-9                      | [21]         |



| Mapped gene <sup>a</sup>   | Region | SNPId <sup>b</sup> | Chr | Position <sup>c</sup> | LD <sup>d</sup> | Type <sup>e</sup> | cDNA     | Protein    | ClinVar <sup>f</sup> | Polyphen <sup>g</sup> | Sift <sup>h</sup> | p-value         | References |
|----------------------------|--------|--------------------|-----|-----------------------|-----------------|-------------------|----------|------------|----------------------|-----------------------|-------------------|-----------------|------------|
| <i>SH3TC1</i>              |        | rs2002574          | 4   | 8,222,549             |                 | intronic          |          |            |                      |                       |                   | 2E-9            | [22]       |
| <i>RBM47, RNU7-74P</i>     |        | rs203273           | 4   | 40,416,653            |                 | intergenic        |          |            |                      |                       |                   | 5E-12           | [22]       |
| <i>TMPRSS11E, UGT2B29P</i> |        | rs9884390          | 4   | 68,507,689            |                 | intergenic        |          |            |                      |                       |                   | 7E-24           | [21]       |
| <i>UGT2B17, UGT2B15</i>    |        | rs4860987          | 4   | 68,625,566            |                 | intergenic        |          |            |                      |                       |                   | 6E-49           | [22]       |
| <i>UGT2B28 - UGT2B4</i>    |        | chr4:69455038      | 4   | 69,455,038            |                 | intergenic        |          |            |                      |                       |                   | 4E-27           | [20]       |
| <i>ADAMTS3</i>             |        | rs151193598        | 4   | 72,437,677            |                 | intronic          |          |            |                      |                       |                   | 3E-10           | [15]       |
| <i>ADAMTS3 - COX18</i>     |        | rs190671241        | 4   | 72,708,425            |                 | intergenic        |          |            |                      |                       |                   | 2E-11           | [15]       |
| <i>ADAMTS3 - COX18</i>     |        | chr4:72754788      | 4   | 72,754,788            |                 | intergenic        |          |            |                      |                       |                   | 2E-6            | [15]       |
| <i>ADAMTS3 - COX18</i>     |        | rs181948526        | 4   | 72,902,905            |                 | intergenic        |          |            |                      |                       |                   | 9E-13           | [15]       |
| <i>ADAMTS3 - COX18</i>     |        | chr4:72954415      | 4   | 72,954,415            |                 | intergenic        |          |            |                      |                       |                   | 2E-6            | [15]       |
| <i>ANKRD17</i>             |        | chr4:73134560      | 4   | 73,134,560            |                 | intronic          |          |            |                      |                       |                   | 1E-7            | [15]       |
| <i>ANKRD17</i>             |        | rs187918276        | 4   | 73,167,847            |                 | intronic          |          |            |                      |                       |                   | 3E-13           | [15]       |
| <i>ALB, ANKRD17</i>        |        | rs72663045         | 4   | 73,311,680            |                 | intergenic        |          |            |                      |                       |                   | 6E-7            | [21]       |
| <i>LINC02499</i>           |        | rs113759232        | 4   | 73,522,447            |                 | intergenic        |          |            |                      |                       |                   | 2E-11           | [15]       |
| <i>UMLILO, RASSF6</i>      |        | rs573930512        | 4   | 73,646,563            |                 | intergenic        |          |            |                      |                       |                   | 8E-12           | [15]       |
| <i>MTHFD2L</i>             |        | chr4:74133592      | 4   | 74,133,592            |                 | intronic          |          |            |                      |                       |                   | 3E-6            | [15]       |
| <i>MTHFD2L</i>             |        | rs182616603        | 4   | 74,219,015            |                 | intronic          |          |            |                      |                       |                   | 2E-12           | [13]       |
| <i>MTHFD2L</i>             |        | chr4:74265673      | 4   | 74,265,673            |                 | intronic          |          |            |                      |                       |                   | 5E-12           | [15]       |
| <i>AREG - BTC</i>          |        | chr4:74653273      | 4   | 74,653,273            |                 | intergenic        |          |            |                      |                       |                   | 3E-8            | [15]       |
| <i>BTC</i>                 |        | chr4:74793806      | 4   | 74,793,806            |                 | intronic          |          |            |                      |                       |                   | 2E-8            | [15]       |
| <i>PARM1</i>               |        | chr4:74990001      | 4   | 74,990,001            |                 | intronic          |          |            |                      |                       |                   | 8E-9            | [15]       |
| <i>PARM1 - RCHY1</i>       |        | chr4:75242737      | 4   | 75,242,737            |                 | intergenic        |          |            |                      |                       |                   | 6E-9            | [15]       |
| <i>PARM1 - RCHY1</i>       |        | chr4:75422391      | 4   | 75,422,391            |                 | intergenic        |          |            |                      |                       |                   | 1E-7            | [15]       |
| <i>CDKL2</i>               |        | chr4:75583178      | 4   | 75,583,178            |                 | intronic          |          |            |                      |                       |                   | 3E-6            | [15]       |
| <i>G3BP2</i>               |        | chr4:75684215      | 4   | 75,684,215            |                 | intronic          |          |            |                      |                       |                   | 4E-6            | [15]       |
| <i>FGF5, PRDM8</i>         |        | rs1458038          | 4   | 80,243,569            |                 | intergenic        |          |            |                      |                       |                   | 7E-16           | [21]       |
| <i>AFF1</i>                |        | rs3775228          | 4   | 87,064,014            |                 | intronic          |          |            |                      |                       |                   | 2E-12           | [20]       |
| <i>ADH1B</i>               |        | rs1229984          | 4   | 99,318,162            |                 | missense          | c.143A>G | p.His48Arg | protective           | benign                | tolerated         | 1E-20;<br>7E-17 | [20][21]   |

| Mapped gene <sup>a</sup>  | Region       | SNPId <sup>b</sup> | Chr | Position <sup>c</sup> | LD <sup>d</sup> | Type <sup>e</sup> | cDNA           | Protein     | ClinVar <sup>f</sup> | Polyphen <sup>g</sup> | Sift <sup>h</sup> | p-value                                              | References             |
|---------------------------|--------------|--------------------|-----|-----------------------|-----------------|-------------------|----------------|-------------|----------------------|-----------------------|-------------------|------------------------------------------------------|------------------------|
| <i>SLC39A8</i>            |              | rs13107325         | 4   | 102,267,552           |                 | missense          | c.970G>A       | p.Ala391Thr | np                   | benign                | tolerated         | 1E-10;<br>6E-10                                      | [20][21]               |
| <i>TRIM2</i>              |              | rs41280463         | 4   | 153,270,074           |                 | intronic          |                |             |                      |                       |                   | 6E-10                                                | [20]                   |
| <i>FGB, PLRG1</i>         |              | rs114756490        | 4   | 154,555,475           |                 | intergenic        |                |             |                      |                       |                   | 1E-11                                                | [20]                   |
| <i>FGB</i>                |              | rs6054             | 4   | 154,568,456           |                 | missense          | c.794C>T       | p.Pro265Leu | conflicting          | probably<br>damaging  | tolerated         | 6E-26                                                | [22]                   |
| <i>GUCY1A1</i>            |              | rs990619           | 4   | 155,586,526           |                 | intergenic        |                |             |                      |                       |                   | 2E-8                                                 | [21]                   |
| -                         |              | rs2716769          | 4   | 179,549,287           |                 | intergenic        |                |             |                      |                       |                   | 2E-7                                                 | [17]                   |
| <i>CYP4V2</i>             |              | rs13146272         | 4   | 186,199,057           |                 | missense          | c.775C>A       | p.Gln259Lys | benign               | benign                | tolerated         | 1E-7                                                 | [16]                   |
| <i>RAI14</i>              |              | rs146433259        | 5   | 34,713,687            |                 | intronic          |                |             |                      |                       |                   | 5E-8;<br>1E-9                                        | [21][22]               |
| <i>IL7R, CAPSL</i>        |              | rs6871748          | 5   | 35,885,880            |                 | intergenic        |                |             |                      |                       |                   | 5E-8                                                 | [22]                   |
| <i>ITGA1</i>              |              | rs115421711        | 5   | 52,787,392            |                 | intergenic        |                |             |                      |                       |                   | 2E-29                                                | [22]                   |
| <i>ITGA1, PELO</i>        |              | rs116734477        | 5   | 52,799,190            |                 | intronic          |                |             |                      |                       |                   | 1E-20;<br>3E-19                                      | [20][21]               |
| <i>ARL15</i>              |              | rs7735249          | 5   | 54,014,309            |                 | intronic          |                |             |                      |                       |                   | 2E-8                                                 | [22]                   |
| <i>C5orf67</i>            |              | rs547065676        | 5   | 56,561,722            |                 | intergenic        |                |             |                      |                       |                   | 2E-31                                                | [22]                   |
| <i>C5orf67</i>            |              | rs3936511          | 5   | 56,564,954            |                 | intergenic        |                |             |                      |                       |                   | 7E-18                                                | [20]                   |
| <i>C5orf67</i>            |              | rs9686661          | 5   | 56,565,959            |                 | intergenic        |                |             |                      |                       |                   | 1E-8                                                 | [21]                   |
| <i>LINC02056</i>          |              | rs2925677          | 5   | 72,657,802            |                 | intergenic        |                |             |                      |                       |                   | 4E-14;<br>1E-13                                      | [20][21]               |
| <i>LINC02056, RPL7P22</i> |              | rs3010239          | 5   | 72,714,474            |                 | intergenic        |                |             |                      |                       |                   | 2E-21                                                | [22]                   |
| <i>HMGCR, ANKRD31</i>     | <i>HMGCR</i> | rs2335418          | 5   | 75,307,654            |                 | intergenic        |                |             |                      |                       |                   | 5E-321                                               | [22]                   |
| <i>HMGCR</i>              |              | rs3843482          | 5   | 75,343,434            |                 | intronic          |                |             |                      |                       |                   | 2E-45                                                | [13]                   |
| <i>HMGCR</i>              |              | rs12654264         | 5   | 75,352,778            |                 | intronic          | c.1368+1176A>T |             | association          |                       |                   | 1E-20                                                | [2]                    |
| <i>HMGCR</i>              |              | rs3846662          | 5   | 75,355,259            |                 | intronic          |                |             |                      |                       |                   | 2E-11                                                | [5]                    |
| <i>HMGCR, CERT1</i>       |              | rs3846663          | 5   | 75,359,901            |                 | intronic          |                |             |                      |                       |                   | 8E-12;<br>2E-15;                                     | [4][19]                |
| <i>HMGCR</i>              |              | rs12916            | 5   | 75,360,714            |                 | 3'-UTR            | c.*372T>C      |             | np                   |                       |                   | 5E-45;<br>1E-11;<br>8E-78;<br>1E-<br>-222;<br>2E-187 | [8][9][12]<br>[20][21] |

| Mapped gene <sup>a</sup>    | Region       | SNPid <sup>b</sup> | Chr | Position <sup>c</sup> | LD <sup>d</sup> | Type <sup>e</sup> | cDNA       | Protein     | ClinVar <sup>f</sup> | Polyphen <sup>g</sup> | Sift <sup>h</sup> | p-value                   | References  |
|-----------------------------|--------------|--------------------|-----|-----------------------|-----------------|-------------------|------------|-------------|----------------------|-----------------------|-------------------|---------------------------|-------------|
| <i>CSNK1G3</i>              |              | rs7734476          | 5   | 123,513,182           |                 | intronic          |            |             |                      |                       |                   | 2E-19;<br>4E-19           | [20][21]    |
| <i>CSNK1G3</i>              |              | rs4530754          | 5   | 123,519,722           |                 | intronic          |            |             |                      |                       |                   | 4E-12                     | [12]        |
| <i>SLC22A5</i>              |              | rs546280079        | 5   | 132,374,220           |                 | intronic          |            |             |                      |                       |                   | 7E-9                      | [20]        |
| <i>SLC22A5, IRF1-AS1</i>    |              | rs1016988          | 5   | 132,408,882           |                 | intergenic        |            |             |                      |                       |                   | 1E-12;<br>5E-11           | [16][21]    |
| <i>CYSTM1</i>               |              | rs17118739         | 5   | 140,218,325           |                 | intronic          |            |             |                      |                       |                   | 3E-9                      | [20]        |
| <i>HAVCR1, TIMD4</i>        | <i>TIMD4</i> | rs6882076          | 5   | 156,963,286           |                 | intergenic        |            |             |                      |                       |                   | 2E-22;<br>3E-31;<br>2E-69 | [8][12][20] |
| <i>HAVCR1, TIMD4</i>        |              | rs6874202          | 5   | 156,964,617           |                 | intergenic        |            |             |                      |                       |                   | 1E-50                     | [21]        |
| <i>HAVCR1, TIMD4</i>        |              | rs1501908          | 5   | 156,971,158           |                 | intergenic        |            |             |                      |                       |                   | 1E-11                     | [4]         |
| <i>HAVCR1</i>               |              | rs1553318          | 5   | 157,052,312           |                 | intronic          |            |             |                      |                       |                   | 2E-15                     | [13]        |
| <i>FGFR4</i>                |              | rs351855           | 5   | 177,093,242           |                 | missense          | c.1162G>A  | p.Gly388Arg | uncertain            | possibly<br>damaging  | tolerated         | 1E-9                      | [16]        |
| <i>RN7SL554P</i>            |              | rs942922           | 6   | 6,972,360             |                 | intergenic        |            |             |                      |                       |                   | 2E-8                      | [22]        |
| <i>ADTRP, AMD1P4</i>        |              | rs147539187        | 6   | 11,838,809            |                 | intergenic        |            |             |                      |                       |                   | 1E-7                      | [21]        |
| <i>ADTRP, AMD1P4</i>        |              | rs771191353        | 6   | 11,856,024            |                 | intergenic        |            |             |                      |                       |                   | 2E-8                      | [20]        |
| <i>AMD1P4</i>               |              | rs9470298          | 6   | 11,868,281            |                 | intergenic        |            |             |                      |                       |                   | 5E-18                     | [22]        |
| <i>MYLIP, MDH1P2</i>        | <i>MYLIP</i> | rs7746081          | 6   | 16,126,703            |                 | intergenic        |            |             |                      |                       |                   | 1E-39;<br>5E-25           | [20][21]    |
| <i>MYLIP, MDH1P2</i>        |              | rs3757354          | 6   | 16,127,176            |                 | intergenic        |            |             |                      |                       |                   | 1E-11;<br>2E-17;<br>2E-9  | [8][12][13] |
| <i>MRPL42P2, RNU6-1114P</i> |              | rs2142672          | 6   | 16,196,963            |                 | intergenic        |            |             |                      |                       |                   | 2E-8                      | [9]         |
| <i>HFE</i>                  | <i>HFE</i>   | rs1800562          | 6   | 26,092,913            |                 | missense          | c.845G>A   | p.Cys282Tyr | conflicting          | possibly<br>damaging  | deleterious       | 6E-10;<br>8E-14;<br>5E-44 | [8][12][20] |
| <i>HFE</i>                  |              | rs79220007         | 6   | 26,098,246            |                 | 3'-UTR            | c.*4020T>C |             | np                   |                       |                   | 2E-48                     | [21]        |
| <i>MIR3143, RPL10P2</i>     |              | rs71559014         | 6   | 27,154,665            |                 | intergenic        |            |             |                      |                       |                   | 1E-18                     | [20]        |
| <i>HIST1H1B</i>             |              | rs201148465        | 6   | 27,867,515            |                 | synonymous        | c.15T>G    | p.Ala5=     | np                   |                       | tolerated         | 3E-8                      | [16]        |
| <i>ZSCAN16-AS1</i>          |              | rs76079263         | 6   | 28,051,887            |                 | intergenic        |            |             |                      |                       |                   | 4E-21                     | [21]        |
| <i>ZSCAN31</i>              |              | rs35814746         | 6   | 28,331,311            |                 | intronic          |            |             |                      |                       |                   | 4E-16                     | [20]        |

| Mapped gene <sup>a</sup>  | Region      | SNPId <sup>b</sup> | Chr | Position <sup>c</sup> | LD <sup>d</sup> | Type <sup>e</sup> | cDNA     | Protein   | ClinVar <sup>f</sup> | Polyphen <sup>g</sup> | Sift <sup>h</sup> | p-value         | References |
|---------------------------|-------------|--------------------|-----|-----------------------|-----------------|-------------------|----------|-----------|----------------------|-----------------------|-------------------|-----------------|------------|
| <i>HLA-H, HCP5B</i>       | <i>HLA</i>  | rs28849176         | 6   | 29,880,280            |                 | intergenic        |          |           |                      |                       |                   | 1E-17           | [21]       |
| <i>TRIM31-AS1, TRIM31</i> |             | rs9378220          | 6   | 30,109,358            |                 | intronic          |          |           |                      |                       |                   | 4E-18           | [20]       |
| <i>HCG17</i>              |             | rs9391803          | 6   | 30,247,600            |                 | intronic          |          |           |                      |                       |                   | 2E-19           | [21]       |
| <i>HLA-B</i>              |             | rs3179865          | 6   | 31,356,417            |                 | synonymous        | c.369C>T | p.Tyr123= | np                   |                       | tolerated         | 2E-19           | [21]       |
| <i>MICA, HLA-S</i>        |             | rs7741091          | 6   | 31,384,854            |                 | intergenic        |          |           |                      |                       |                   | 3E-26           | [20]       |
| <i>ATP6V1G2</i>           |             | rs34568880         | 6   | 31,546,671            |                 | 5'-UTR            | c.-81G>A |           | np                   |                       |                   | 6E-10           | [21]       |
| <i>FKBPL - PRRT1</i>      |             | chr6:32153409      | 6   | 32,153,409            |                 | intergenic        |          |           |                      |                       |                   | 3E-6            | [15]       |
| <i>HLA-DRA</i>            |             | rs3177928          | 6   | 32,444,658            |                 | 3'-UTR            | c.*18G>A |           | np                   |                       |                   | 2E-15;<br>3E-17 | [8][12]    |
| <i>HLA-DRB9, HLA-DRB5</i> |             | rs114067101        | 6   | 32,490,183            |                 | intergenic        |          |           |                      |                       |                   | 8E-13           | [13]       |
| <i>HLA-DQA1</i>           |             | rs17205170         | 6   | 32,634,706            |                 | intronic          |          |           |                      |                       |                   | 1E-44           | [20]       |
| <i>MTCO3P1, HLA-DQB1</i>  |             | rs34392107         | 6   | 32,696,177            |                 | intergenic        |          |           |                      |                       |                   | 6E-45           | [21]       |
| <i>COL11A2</i>            | <i>RXRB</i> | rs2254287          | 6   | 33,176,171            |                 | intronic          |          |           | benign               |                       |                   | 5E-8            | [1]        |
| <i>ILRUN</i>              |             | rs76967117         | 6   | 34,635,914            |                 | intronic          |          |           |                      |                       |                   | 2E-17           | [21]       |
| <i>SNRPC</i>              |             | rs114863007        | 6   | 34,761,381            |                 | intronic          |          |           |                      |                       |                   | 6E-15           | [20]       |
| <i>COX6A1P2, RPL12P2</i>  |             | rs913499           | 6   | 37,070,656            |                 | intergenic        |          |           |                      |                       |                   | 5E-11;<br>1E-8  | [20][21]   |
| <i>KCNK17, KCNK5</i>      |             | rs4711589          | 6   | 39,262,795            |                 | intergenic        |          |           |                      |                       |                   | 8E-9            | [20]       |
| <i>KCNK17, KCNK5</i>      |             | rs55804343         | 6   | 39,267,131            |                 | intergenic        |          |           |                      |                       |                   | 7E-8            | [21]       |
| <i>CNPY3, RPL24P4</i>     |             | rs9471975          | 6   | 42,951,484            |                 | intergenic        |          |           |                      |                       |                   | 1E-9            | [21]       |
| <i>LINC02537, VEGFA</i>   |             | rs998584           | 6   | 43,790,159            |                 | intergenic        |          |           |                      |                       |                   | 2E-10           | [20]       |
| <i>TRAM2-AS1</i>          |             | rs2239619          | 6   | 52,588,422            |                 | intergenic        |          |           |                      |                       |                   | 4E-15           | [16]       |
| <i>LINC01564, KLHL31</i>  |             | rs12665537         | 6   | 53,644,654            |                 | intergenic        |          |           |                      |                       |                   | 3E-11           | [20]       |
| <i>PRDX2P4</i>            |             | rs9496567          | 6   | 100,154,877           |                 | intergenic        |          |           |                      |                       |                   | 6E-13           | [21]       |
| <i>PRDX2P4</i>            |             | rs17185536         | 6   | 100,173,055           |                 | intergenic        |          |           |                      |                       |                   | 4E-15           | [20]       |
| <i>PRDM1, RN7SKP211</i>   |             | rs4946713          | 6   | 105,926,140           |                 | intergenic        |          |           |                      |                       |                   | 2E-8            | [20]       |
| <i>FRK</i>                |             | rs9488822          | 6   | 115,991,730           |                 | intronic          |          |           |                      |                       |                   | 3E-9;<br>2E-7   | [8][12]    |
| <i>FRK</i>                |             | rs3822855          | 6   | 115,995,719           |                 | intronic          |          |           |                      |                       |                   | 4E-17           | [21]       |
| <i>FRK</i>                |             | rs35936182         | 6   | 116,023,963           |                 | intronic          |          |           |                      |                       |                   | 1E-18           | [20]       |

| Mapped gene <sup>a</sup> | Region               | SNPId <sup>b</sup> | Chr | Position <sup>c</sup> | LD <sup>d</sup> | Type <sup>e</sup> | cDNA          | Protein    | ClinVar <sup>f</sup> | Polyphen <sup>g</sup> | Sift <sup>h</sup> | p-value                  | References  |
|--------------------------|----------------------|--------------------|-----|-----------------------|-----------------|-------------------|---------------|------------|----------------------|-----------------------|-------------------|--------------------------|-------------|
| <i>RSPO3</i>             |                      | rs141783576        | 6   | 127,118,752           |                 | 5'-UTR            | c.-441G>C     |            | np                   |                       |                   | 2E-11                    | [20]        |
| <i>RSPO3</i>             |                      | rs9491699          | 6   | 127,150,388           |                 | intronic          |               |            |                      |                       |                   | 2E-11                    | [21]        |
| <i>L3MBTL3</i>           |                      | rs12197047         | 6   | 130,068,066           |                 | intronic          |               |            |                      |                       |                   | 2E-9;<br>1E-9            | [20][21]    |
| <i>HBS1L</i>             |                      | rs7776054          | 6   | 135,097,778           |                 | intronic          |               |            |                      |                       |                   | 7E-12                    | [21]        |
| <i>HBS1L</i>             |                      | rs9389268          | 6   | 135,098,493           |                 | intronic          |               |            |                      |                       |                   | 3E-15                    | [20]        |
| <i>REPS1, ABRACL</i>     |                      | rs66883945         | 6   | 138,996,691           |                 | intergenic        |               |            |                      |                       |                   | 3E-10                    | [20]        |
| <i>FNDC1 - SOD2</i>      | <i>SLC22A1 - LPA</i> | rs12191504         | 6   | 159,537,803           |                 | intergenic        |               |            |                      |                       |                   | 3E-8                     | [20]        |
| <i>IGF2R</i>             |                      | rs73025516         | 6   | 160,099,774           |                 | intronic          |               |            |                      |                       |                   | 9E-10                    | [21]        |
| <i>SLC22A1</i>           |                      | rs12208357         | 6   | 160,122,116           |                 | missense          | c.181C>T      | p.Arg61Cys | np                   | probably<br>damaging  | deleterious       | 3E-44                    | [21]        |
| <i>SLC22A1</i>           |                      | rs2297374          | 6   | 160,154,953           |                 | intronic          |               |            |                      |                       |                   | 5E-6                     | [13]        |
| <i>SLC22A1</i>           |                      | rs146534110        | 6   | 160,157,037           |                 | intronic          |               |            |                      |                       |                   | 9E-14                    | [21]        |
| <i>SLC22A1</i>           |                      | rs1564348          | 6   | 160,157,828           |                 | intronic          |               |            |                      |                       |                   | 2E-17;<br>3E-21;<br>2E-9 | [8][12][19] |
| <i>LPAL2</i>             |                      | rs117733303        | 6   | 160,501,838           |                 | intronic          |               |            |                      |                       |                   | 3E-27                    | [21]        |
| <i>LPA</i>               |                      | rs118039278        | 6   | 160,564,494           |                 | intronic          |               |            |                      |                       |                   | 6E-170;<br>2E-102        | [20][21]    |
| <i>LPA</i>               |                      | rs10455872         | 6   | 160,589,086           |                 | intronic          | c.3947+467T>C |            | drug response        |                       |                   | 3E-321                   | [22]        |
| <i>LPA, PLG</i>          |                      | rs186696265        | 6   | 160,690,668           |                 | intergenic        |               |            |                      |                       |                   | 4E-14                    | [13]        |
| <i>C7orf50</i>           |                      | rs10272002         | 7   | 1,007,979             |                 | intronic          |               |            |                      |                       |                   | 3E-19                    | [22]        |
| <i>C7orf50</i>           |                      | rs869412           | 7   | 1,034,498             |                 | intronic          |               |            |                      |                       |                   | 1E-8                     | [21]        |
| <i>C7orf50</i>           |                      | rs10275712         | 7   | 1,043,282             |                 | intronic          |               |            |                      |                       |                   | 6E-12                    | [20]        |
| <i>RAC1</i>              |                      | rs836550           | 7   | 6,400,806             |                 | intronic          |               |            |                      |                       |                   | 5E-8                     | [21]        |
| <i>AHR</i>               |                      | rs6968865          | 7   | 17,247,645            |                 | 5'-UTR            |               |            | np                   |                       |                   | 4E-10                    | [22]        |
| <i>SP4, RNU1-15P</i>     | <i>DNAH11</i>        | rs28406917         | 7   | 21,409,833            |                 | intergenic        |               |            |                      |                       |                   | 2E-8                     | [21]        |
| <i>DNAH11</i>            |                      | rs56130071         | 7   | 21,559,135            |                 | intronic          |               |            |                      |                       |                   | 2E-14;<br>5E-39          | [13][21]    |
| <i>DNAH11</i>            |                      | rs150169808        | 7   | 21,562,042            |                 | intronic          |               |            |                      |                       |                   | 7E-50;<br>2E-87          | [20][22]    |

| Mapped gene <sup>a</sup> | Region        | SNPid <sup>b</sup> | Chr | Position <sup>c</sup> | LD <sup>d</sup> | Type <sup>e</sup> | cDNA       | Protein     | ClinVar <sup>f</sup> | Polyphen <sup>g</sup> | Sift <sup>h</sup> | p-value                             | References           |
|--------------------------|---------------|--------------------|-----|-----------------------|-----------------|-------------------|------------|-------------|----------------------|-----------------------|-------------------|-------------------------------------|----------------------|
| <i>DNAH11</i>            | <i>DNAH11</i> | rs12670798         | 7   | 21,567,734            |                 | intronic          |            |             |                      |                       |                   | 6E-9;<br>7E-10;<br>5E-14            | [5][8][12]           |
| <i>MIR148A</i>           |               | rs4722551          | 7   | 25,952,206            |                 | intergenic        |            |             |                      |                       |                   | 4E-14;<br>2E-19;<br>1E-17;<br>6E-37 | [12][20][21]<br>[22] |
| <i>JAZF1</i>             |               | rs12055996         | 7   | 28,152,174            |                 | intronic          |            |             |                      |                       |                   | 4E-9                                | [22]                 |
| <i>MARK2P13, EEPD1</i>   |               | rs67050321         | 7   | 36,129,593            |                 | intergenic        |            |             |                      |                       |                   | 6E-13;<br>2E-11;<br>5E-20           | [20][21][22]         |
| <i>INHBA-AS1</i>         |               | rs142220572        | 7   | 41,710,893            |                 | intergenic        |            |             |                      |                       |                   | 2E-8                                | [22]                 |
| <i>NPC1L1</i>            | <i>NPC1L1</i> | rs2072183          | 7   | 44,539,581            |                 | synonymous        | c.816C>G   | p.Leu272=   | benign               |                       | tolerated         | 4E-11;<br>7E-16                     | [8][12]              |
| <i>NPC1L1</i>            |               | rs41279633         | 7   | 44,541,277            |                 | 5'-UTR            | c.-18C>A   |             | np                   |                       |                   | 1E-10                               | [13]                 |
| <i>NPC1L1, DDX56</i>     |               | rs2073547          | 7   | 44,542,732            |                 | intergenic        |            |             |                      |                       |                   | 5E-50;<br>2E-40;<br>4E-88           | [20][21][22]         |
| <i>MLXIPL</i>            |               | rs799157           | 7   | 73,605,971            |                 | synonymous        | c.759A>G   | p.Ser253=   | np                   |                       | tolerated         | 9E-13                               | [20]                 |
| <i>POR</i>               |               | rs2302429          | 7   | 75,985,459            |                 | intronic          |            |             |                      |                       |                   | 1E-11                               | [20]                 |
| <i>ABCB4</i>             |               | rs31674            | 7   | 87,439,148            |                 | intronic          |            |             |                      |                       |                   | 6E-9                                | [20]                 |
| <i>ABCB4</i>             |               | rs4148826          | 7   | 87,445,103            |                 | intronic          |            |             |                      |                       |                   | 7E-9                                | [21]                 |
| <i>BAIAP2L1</i>          |               | rs112758337        | 7   | 98,347,956            |                 | intronic          |            |             |                      |                       |                   | 2E-9                                | [21]                 |
| <i>PPIAP82, BAIAP2L1</i> |               | rs377584195        | 7   | 98,405,352            |                 | intergenic        |            |             |                      |                       |                   | 1E-12                               | [20]                 |
| <i>MOSPD3, TFR2</i>      |               | rs10953298         | 7   | 100,619,150           |                 | intergenic        |            |             |                      |                       |                   | 2E-17                               | [20]                 |
| <i>EPO, ZAN</i>          |               | rs111338114        | 7   | 100,732,869           |                 | intergenic        |            |             |                      |                       |                   | 5E-9                                | [21]                 |
| <i>RPS29P15, MUC3A</i>   |               | rs10231941         | 7   | 100,934,914           |                 | intergenic        |            |             |                      |                       |                   | 3E-13                               | [21]                 |
| <i>PRKAR2B</i>           |               | rs257377           | 7   | 107,160,643           |                 | 3'-UTR            | c.*1061G>T |             | np                   |                       |                   | 2E-9                                | [22]                 |
| <i>PPP1R3A</i>           |               | rs12705932         | 7   | 113,987,029           |                 | intronic          |            |             |                      |                       |                   | 1E-6                                | [17]                 |
| <i>CAPZA2</i>            |               | rs41785            | 7   | 116,845,966           |                 | intronic          |            |             |                      |                       |                   | 9E-9                                | [22]                 |
| <i>ZNF800</i>            |               | rs62621812         | 7   | 127,375,029           |                 | missense          | c.307C>T   | p.Pro103Ser | np                   | benign                | tolerated         | 3E-8                                | [22]                 |
| <i>CEP41</i>             |               | chr7:130438531     | 7   | 130,438,531           |                 | intronic          |            |             |                      |                       |                   | 4E-11                               | [20]                 |
| <i>KLF14, H4P1</i>       |               | rs35363532         | 7   | 130,760,670           |                 | intergenic        |            |             |                      |                       |                   | 3E-22                               | [22]                 |

| Mapped gene <sup>a</sup>     | Region         | SNPid <sup>b</sup> | Chr | Position <sup>c</sup> | LD <sup>d</sup> | Type <sup>e</sup> | cDNA       | Protein     | ClinVar <sup>f</sup> | Polyphen <sup>g</sup> | Sift <sup>h</sup> | p-value                   | References  |
|------------------------------|----------------|--------------------|-----|-----------------------|-----------------|-------------------|------------|-------------|----------------------|-----------------------|-------------------|---------------------------|-------------|
| <i>BPGM, TUBB3P2</i>         |                | rs2347699          | 7   | 134,706,212           |                 | intergenic        |            |             |                      |                       |                   | 3E-8                      | [22]        |
| <i>RN7SKP280, INSIG1-DT</i>  |                | rs4374942          | 7   | 155,235,097           |                 | intergenic        |            |             |                      |                       |                   | 1E-12                     | [22]        |
| <i>MCPH1-AS1</i>             |                | rs2911987          | 8   | 6,707,055             |                 | intergenic        |            |             |                      |                       |                   | 3E-11                     | [22]        |
| <i>RNU6-526P, RNU6-1151P</i> | <i>PPP1R3B</i> | rs7012637          | 8   | 9,315,699             |                 | intergenic        |            |             |                      |                       |                   | 9E-45                     | [20]        |
| <i>RNU6-1151P, RNU6-526P</i> |                | rs2169387          | 8   | 9,323,885             |                 | intergenic        |            |             |                      |                       |                   | 3E-16                     | [13]        |
| <i>RNU6-526P, RNU6-1151P</i> |                | rs9987289          | 8   | 9,325,848             |                 | intergenic        |            |             |                      |                       |                   | 7E-15;<br>9E-24;<br>5E-36 | [8][12][21] |
| <i>RNU6-526P, RNU6-1151P</i> |                | rs2126259          | 8   | 9,327,636             |                 | intergenic        |            |             |                      |                       |                   | 7E-12                     | [9]         |
| <i>RNU6-1151P, RNU6-526P</i> |                | rs1461729          | 8   | 9,329,732             |                 | intergenic        |            |             |                      |                       |                   | 3E-6                      | [19]        |
| <i>TNKS</i>                  |                | rs1350559          | 8   | 9,510,233             |                 | intergenic        |            |             |                      |                       |                   | 2E-10                     | [21]        |
| <i>NAT2</i>                  |                | rs1495741          | 8   | 18,415,371            |                 | intergenic        |            |             |                      |                       |                   | 3E-28;<br>5E-12           | [20][21]    |
|                              |                |                    | 8   | 19,966,981            |                 | 3'-UTR            | c.*1671T>C |             | benign               |                       |                   | 1E-21                     | [20]        |
| <i>DMTN</i>                  |                | rs7386762          | 8   | 22,069,949            |                 | intronic          |            |             |                      |                       |                   | 8E-13                     | [20]        |
| <i>DMTN</i>                  |                | rs59328596         | 8   | 22,070,716            |                 | intronic          |            |             |                      |                       |                   | 9E-10                     | [21]        |
| <i>KIF13B</i>                |                | rs117139027        | 8   | 29,167,426            |                 | missense          | c.1105C>T  | p.Arg369Trp | np                   | probably<br>damaging  | deleterious       | 4E-15;<br>7E-13           | [20][21]    |
| <i>ANK1</i>                  |                | rs72638977         | 8   | 41,683,104            |                 | intronic          |            |             |                      |                       |                   | 1E-8                      | [21]        |
| <i>TRMT112P7, RP1</i>        |                | rs10102164         | 8   | 54,509,054            |                 | intergenic        |            |             |                      |                       |                   | 4E-11                     | [12]        |
| <i>RP1</i>                   |                | rs9298506          | 8   | 54,524,964            |                 | intronic          |            |             |                      |                       |                   | 3E-23;<br>3E-13           | [20][21]    |
|                              |                |                    | 8   | 58,476,006            |                 | intergenic        |            |             |                      |                       |                   | 4E-9;<br>1E-7             | [8][12]     |
|                              |                |                    | 8   | 58,479,765            |                 | intergenic        |            |             |                      |                       |                   | 2E-11                     | [13]        |
|                              |                |                    | 8   | 58,480,714            |                 | intergenic        |            |             |                      |                       |                   | 2E-56;<br>3E-46           | [20][21]    |
| <i>RAB2A</i>                 |                | rs5891768          | 8   | 60,563,015            |                 | intronic          |            |             |                      |                       |                   | 2E-11                     | [20]        |
| <i>TMEM70</i>                |                | rs2306486          | 8   | 73,976,259            |                 | 5'-UTR            | c.-23C>T   |             | benign               |                       |                   | 4E-11                     | [20]        |
| <i>TMEM74 - TRHR</i>         |                | rs4620259          | 8   | 108,979,439           |                 | intergenic        |            |             |                      |                       |                   | 5E-8                      | [21]        |
| <i>TRPS1</i>                 |                | rs2737245          | 8   | 115,646,356           |                 | intronic          |            |             |                      |                       |                   | 5E-30                     | [20]        |
| <i>TRPS1</i>                 |                | rs2737265          | 8   | 115,655,407           |                 | intronic          |            |             |                      |                       |                   | 2E-18                     | [21]        |

| Mapped gene <sup>a</sup> | Region       | SNP <sup>id</sup> <sup>b</sup> | Chr | Position <sup>c</sup> | LD <sup>d</sup> | Type <sup>e</sup> | cDNA      | Protein     | ClinVar <sup>f</sup> | Polyphen <sup>g</sup> | Sift <sup>h</sup> | p-value                            | References   |
|--------------------------|--------------|--------------------------------|-----|-----------------------|-----------------|-------------------|-----------|-------------|----------------------|-----------------------|-------------------|------------------------------------|--------------|
| <i>TRIB1 - LRATD2</i>    | <i>TRIB1</i> | rs2954021                      | 8   | 125,469,835           |                 | intergenic        |           |             |                      |                       |                   | 1E-7                               | [9]          |
| <i>TRIB1 - LRATD2</i>    |              | rs17321515                     | 8   | 125,474,167           |                 | intergenic        |           |             |                      |                       |                   | 5E-12                              | [19]         |
| <i>TRIB1 - LRATD2</i>    |              | rs2954029                      | 8   | 125,478,730           |                 | intergenic        |           |             |                      |                       |                   | 3E-29;<br>2E-50                    | [8][12]      |
| <i>TRIB1 - LRATD2</i>    |              | rs28601761                     | 8   | 125,487,789           |                 | intergenic        |           |             |                      |                       |                   | 6E-264;<br>1E-184                  | [20][21]     |
| <i>TRIB1 - LRATD2</i>    |              | rs6987702                      | 8   | 125,492,484           |                 | intergenic        |           |             |                      |                       |                   | 3E-6                               | [5]          |
| <i>TRIB1 - LRATD2</i>    |              | rs112875651                    | 8   | 125,494,452           |                 | intergenic        |           |             |                      |                       |                   | 4E-26                              | [13]         |
| <i>TRIB1 - LRATD2</i>    |              | chr8:126504383                 | 8   | 126,504,383           |                 | intergenic        |           |             |                      |                       |                   | 5E-324                             | [22]         |
| <i>PTK2</i>              |              | rs11997161                     | 8   | 140,728,488           |                 | intronic          |           |             |                      |                       |                   | 3E-8                               | [22]         |
| <i>PTK2</i>              |              | rs28768427                     | 8   | 140,978,586           |                 | intronic          |           |             |                      |                       |                   | 1E-8                               | [21]         |
| <i>PLEC</i>              |              | rs11781667                     | 8   | 143,966,688           |                 | intergenic        |           |             |                      |                       |                   | 4E-18                              | [20]         |
| <i>PLEC</i>              |              | rs11136341                     | 8   | 143,969,375           |                 | intronic          |           |             |                      |                       |                   | 4E-13;<br>7E-12                    | [8][12]      |
| <i>PLEC</i>              |              | rs11786083                     | 8   | 143,976,190           |                 | intronic          |           |             |                      |                       |                   | 7E-13                              | [21]         |
| <i>PARP10</i>            |              | rs1134027                      | 8   | 143,977,246           |                 | 3'-UTR            | c.*238C>T |             | np                   |                       |                   | 2E-34                              | [22]         |
| <i>PARP10</i>            |              | rs11784833                     | 8   | 143,989,244           |                 | intronic          |           |             |                      |                       |                   | 2E-10                              | [13]         |
| <i>VLDLR</i>             |              | rs3780181                      | 9   | 2,640,759             |                 | intronic          |           |             |                      |                       |                   | 2E-9;<br>2E-14;<br>3E-11;<br>1E-23 | [12][20][21] |
| <i>BNC2</i>              |              | rs10810657                     | 9   | 16,884,588            |                 | intergenic        |           |             |                      |                       |                   | 1E-11;<br>5E-20                    | [20][22]     |
| <i>DENND4C</i>           |              | rs34150222                     | 9   | 19,313,915            |                 | intronic          |           |             |                      |                       |                   | 2E-12                              | [20]         |
| <i>RPS6</i>              |              | rs67710536                     | 9   | 19,376,257            |                 | 3'-UTR            | c.*36T>G  |             | np                   |                       |                   | 1E-10                              | [16]         |
| <i>CDKN2B-AS1</i>        |              | rs6475606                      | 9   | 22,081,851            |                 | intergenic        |           |             |                      |                       |                   | 2E-22                              | [21]         |
| <i>PCSK5</i>             |              | rs1571790                      | 9   | 76,114,260            |                 | intronic          |           |             |                      |                       |                   | 2E-11                              | [20]         |
| <i>PCSK5</i>             |              | rs6560499                      | 9   | 76,115,850            |                 | intronic          |           |             |                      |                       |                   | 8E-9                               | [21]         |
| <i>ABCA1</i>             |              | rs2066714                      | 9   | 104,824,472           |                 | missense          | c.2649A>G | p.Ile883Met | benign               | benign                | tolerated         | 2E-11                              | [21]         |
| <i>ABCA1</i>             | <i>ABCA1</i> | rs11789603                     | 9   | 104,884,738           |                 | intronic          |           |             |                      |                       |                   | 1E-13                              | [21]         |
| <i>ABCA1</i>             |              | rs2740488                      | 9   | 104,899,461           |                 | intronic          |           |             |                      |                       |                   | 5E-37;<br>8E-27                    | [20][21]     |



| Mapped gene <sup>a</sup> | Region | SNPId <sup>b</sup>           | Chr | Position <sup>c</sup> | LD <sup>d</sup> | Type <sup>e</sup> | cDNA      | Protein      | ClinVar <sup>f</sup> | Polyphen <sup>g</sup> | Sift <sup>h</sup> | p-value                   | References   |
|--------------------------|--------|------------------------------|-----|-----------------------|-----------------|-------------------|-----------|--------------|----------------------|-----------------------|-------------------|---------------------------|--------------|
| PKN3                     |        | rs13283282                   | 9   | 128,703,202           |                 | intronic          |           |              |                      |                       |                   | 3E-14;<br>3E-12           | [20][21]     |
|                          |        |                              | 9   | 133,266,456           |                 | intronic          |           |              | association          |                       |                   | 2E-228                    | [22]         |
|                          |        |                              | 9   | 133,271,182           |                 | intronic          |           |              |                      |                       |                   | 6E-20                     | [13]         |
|                          |        |                              | 9   | 133,274,295           |                 | intronic          |           |              |                      |                       |                   | 9E-96                     | [21]         |
|                          |        |                              | 9   | 133,279,427           |                 | intergenic        |           |              |                      |                       |                   | 8E-22                     | [8]          |
|                          |        |                              | 9   | 133,279,427           |                 | intergenic        |           |              |                      |                       |                   | 2E-41                     | [12]         |
| TMEM250 - LHX3           |        | chr9:136138765               | 9   | 136,138,765           |                 | intergenic        |           |              |                      |                       |                   | 7E-136                    | [20]         |
| INPP5E, PMPCA            |        | rs10448340                   | 9   | 136,425,617           |                 | intergenic        |           |              |                      |                       |                   | 1E-11;<br>6E-16           | [21][22]     |
| PMPCA, INPP5E            |        | rs34297856                   | 9   | 136,427,993           |                 | intergenic        |           |              |                      |                       |                   | 2E-9                      | [20]         |
| SEC16A                   |        | rs3812594                    | 9   | 136,474,501           |                 | missense          | c.3115C>T | p.Arg1039Cys | np                   | benign                | tolerated         | 1E-12                     | [16]         |
| RBM17, RPL32P23          |        | rs75641219                   | 10  | 6,087,347             |                 | intergenic        |           |              |                      |                       |                   | 3E-8                      | [22]         |
| GATA3                    |        | rs3824667                    | 10  | 8,058,162             |                 | intronic          |           |              |                      |                       |                   | 3E-8                      | [22]         |
| TRDMT1, VIM-AS1          |        | rs10795464                   | 10  | 17,213,096            |                 | intergenic        |           |              |                      |                       |                   | 3E-13                     | [22]         |
| CACNB2                   |        | rs1757216                    | 10  | 18,217,497            |                 | intronic          |           |              |                      |                       |                   | 1E-8                      | [22]         |
| CACNB2                   |        | rs11014204                   | 10  | 18,431,916            |                 | intronic          |           |              |                      |                       |                   | 3E-9                      | [21]         |
| ARHGAP12, RPL34P19       |        | rs201700897<br>(rs796526078) | 10  | 31,957,010            |                 | intronic          |           |              |                      |                       |                   | 1E-10                     | [22]         |
| MARCHF8                  |        | rs7908745                    | 10  | 45,458,319            |                 | missense          | c.1642T>C | p.Tyr548His  | np                   | benign                | tolerated         | 6E-11                     | [22]         |
| SGMS1                    |        | rs79828839                   | 10  | 50,592,671            |                 | intronic          |           |              |                      |                       |                   | 2E-8                      | [21]         |
| A1CF                     |        | rs41274050                   | 10  | 50,814,012            |                 | missense          | c.1168G>A | p.Gly390Ser  | likely benign        | probably<br>damaging  | tolerated         | 4E-13                     | [20]         |
| JMJD1C                   |        | rs10761756                   | 10  | 63,412,568            |                 | intronic          |           |              |                      |                       |                   | 1E-9                      | [20]         |
| REEP3                    |        | rs7090758                    | 10  | 63,575,555            |                 | intronic          |           |              |                      |                       |                   | 2E-8                      | [21]         |
| HK1                      |        | rs16926246                   | 10  | 69,333,636            |                 | intronic          |           |              |                      |                       |                   | 2E-18                     | [20]         |
| HK1                      |        | rs17476364                   | 10  | 69,334,748            |                 | intronic          |           |              |                      |                       |                   | 9E-11                     | [21]         |
| CYP26A1, NIP7P1          |        | rs2068888                    | 10  | 93,079,885            |                 | intergenic        |           |              |                      |                       |                   | 6E-32;<br>5E-20;<br>2E-46 | [20][21][22] |
| PKD2L1                   |        | rs603424                     | 10  | 100,315,722           |                 | intronic          |           |              |                      |                       |                   | 3E-11                     | [20]         |

| Mapped gene <sup>a</sup>   | Region       | SNPId <sup>b</sup> | Chr | Position <sup>c</sup> | LD <sup>d</sup> | Type <sup>e</sup> | cDNA       | Protein     | ClinVar <sup>f</sup> | Polyphen <sup>g</sup> | Sift <sup>h</sup> | p-value                   | References   |
|----------------------------|--------------|--------------------|-----|-----------------------|-----------------|-------------------|------------|-------------|----------------------|-----------------------|-------------------|---------------------------|--------------|
| <i>GPAM</i>                |              | rs1129555          | 10  | 112,150,963           |                 | 3'-UTR            | c.*2587T>C |             | np                   |                       |                   | 5E-7                      | [13]         |
| <i>GPAM</i>                |              | rs2250802          | 10  | 112,161,596           |                 | intronic          |            |             |                      |                       |                   | 6E-15                     | [21]         |
| <i>GPAM</i>                |              | rs2792735          | 10  | 112,162,067           |                 | intronic          |            |             |                      |                       |                   | 6E-19                     | [20]         |
| <i>GPAM</i>                |              | rs2255141          | 10  | 112,174,128           |                 | intronic          |            |             |                      |                       |                   | 2E-9;<br>1E-13            | [8][12]      |
| <i>ADRB1</i>               |              | rs72823013         | 10  | 114,026,474           |                 | intergenic        |            |             |                      |                       |                   | 2E-10                     | [22]         |
| <i>ADRB1</i>               |              | rs72823020         | 10  | 114,038,188           |                 | intergenic        |            |             |                      |                       |                   | 6E-12                     | [21]         |
| <i>PNLIPRP2</i>            |              | rs4751996          | 10  | 116,638,383           |                 | missense          | c.1084G>A  | p.Val361Ile | np                   | benign                | tolerated         | 4E-10;1E-17               | [20][22]     |
| <i>PNLIPRP2</i>            |              | rs10885997         | 10  | 116,638,460           |                 | synonymous        | c.1161A>G  | p.Ser387=   | np                   |                       | tolerated         | 7E-9                      | [16]         |
| <i>FAM24B</i>              |              | rs1891110          | 10  | 122,850,511           |                 | missense          | c.5C>T     | p.Pro2Leu   | np                   | benign                | tolerated         | 2E-31                     | [16]         |
| <i>C10orf88, FAM24A</i>    |              | rs10794579         | 10  | 122,927,140           |                 | intergenic        |            |             |                      |                       |                   | 7E-20;<br>2E-25           | [20][22]     |
| <i>C10orf88</i>            |              | rs12246352         | 10  | 122,945,791           |                 | intronic          |            |             |                      |                       |                   | 7E-14                     | [21]         |
| <i>CEND1, GATD1</i>        |              | rs61876729         | 11  | 778,857               |                 | intergenic        |            |             |                      |                       |                   | 6E-10                     | [22]         |
| <i>NAP1L4</i>              |              | rs61871243         | 11  | 2,977,392             |                 | intronic          |            |             |                      |                       |                   | 7E-11                     | [22]         |
| <i>TRIM6-TRIM34, TRIM5</i> |              | rs7108486          | 11  | 5,655,928             |                 | intronic          |            |             |                      |                       |                   | 2E-8                      | [21]         |
| <i>TRIM5</i>               |              | rs11601507         | 11  | 5,679,844             |                 | missense          | c.334G>A   | p.Val112Phe | np                   | benign                | deleterious       | 3E-24;<br>2E-15;<br>3E-40 | [20][21][22] |
| <i>COPB1</i>               |              | rs769117329        | 11  | 14,477,390            |                 | intronic          |            |             |                      |                       |                   | 2E-8                      | [22]         |
| <i>SPTY2D1</i>             |              | rs10128711         | 11  | 18,611,437            |                 | intronic          |            |             |                      |                       |                   | 5E-13                     | [20]         |
| <i>SPTY2D1</i>             |              | rs10500834         | 11  | 18,617,165            |                 | intronic          |            |             |                      |                       |                   | 1E-28                     | [22]         |
| <i>SPTY2D1, SRSF3P1</i>    |              | rs10832963         | 11  | 18,642,694            |                 | intergenic        |            |             |                      |                       |                   | 4E-13                     | [21]         |
| <i>CSRP3-AS1, NAV2</i>     |              | rs4756996          | 11  | 19,333,933            |                 | intergenic        |            |             |                      |                       |                   | 5E-7                      | [17]         |
| <i>LUZP2 - ANO3</i>        |              | rs1489502          | 11  | 26,061,460            |                 | intergenic        |            |             |                      |                       |                   | 3E-9                      | [22]         |
| <i>THEM7P</i>              |              | rs79953563         | 11  | 32,131,922            |                 | intronic          |            |             |                      |                       |                   | 9E-13                     | [22]         |
| <i>FADS1</i>               | <i>FADS1</i> | rs174546           | 11  | 61,802,358            |                 | 3'-UTR            | c.*53G>A   |             | np                   |                       |                   | 1E-7;<br>1E-21;<br>2E-39  | [6][8][12]   |
| <i>FADS1</i>               |              | rs174547           | 11  | 61,803,311            |                 | intronic          |            |             |                      |                       |                   | 6E-9                      | [19]         |
| <i>FADS1</i>               |              | rs174551           | 11  | 61,806,212            |                 | intronic          |            |             |                      |                       |                   | 2E-27                     | [13]         |

| Mapped gene <sup>a</sup> | Region                | SNPId <sup>b</sup> | Chr | Position <sup>c</sup> | LD <sup>d</sup> | Type <sup>e</sup> | cDNA      | Protein | ClinVar <sup>f</sup> | Polyphen <sup>g</sup> | Sift <sup>h</sup> | p-value                                                   | References                  |
|--------------------------|-----------------------|--------------------|-----|-----------------------|-----------------|-------------------|-----------|---------|----------------------|-----------------------|-------------------|-----------------------------------------------------------|-----------------------------|
| <i>FADS2</i>             | <i>FADS1</i>          | rs174564           | 11  | 61,820,833            |                 | intronic          |           |         |                      |                       |                   | 6E-63;<br>3E-48                                           | [20][21]                    |
| <i>FADS2</i>             |                       | rs174570           | 11  | 61,829,740            |                 | intronic          |           |         |                      |                       |                   | 4E-13                                                     | [5]                         |
| <i>NAA40</i>             |                       | rs11373615         | 11  | 63,941,561            |                 | intronic          |           |         |                      |                       |                   | 4E-8                                                      | [20]                        |
| <i>RELA</i>              |                       | rs11227247         | 11  | 65,655,382            |                 | intronic          |           |         |                      |                       |                   | 6E-9                                                      | [21]                        |
| <i>MRPL11</i>            |                       | rs550317996        | 11  | 66,461,002            |                 | intronic          |           |         |                      |                       |                   | 2E-10                                                     | [20]                        |
| <i>ZDHHC24, BBS1</i>     |                       | rs74869459         | 11  | 66,529,098            |                 | intronic          |           |         |                      |                       |                   | 3E-12                                                     | [21]                        |
| <i>PDGFD</i>             |                       | rs115739682        | 11  | 103,999,912           |                 | intronic          |           |         |                      |                       |                   | 1E-9                                                      | [21]                        |
| <i>PDGFD</i>             |                       | rs10791660         | 11  | 104,000,311           |                 | intronic          |           |         |                      |                       |                   | 4E-11                                                     | [20]                        |
| <i>TMPRSS5, MTRF1LP1</i> |                       | rs45543538         | 11  | 113,707,269           |                 | intergenic        |           |         |                      |                       |                   | 2E-8                                                      | [20]                        |
| <i>LINC02702, BUD13</i>  | <i>APOA1-C3-A4-A5</i> | rs12272004         | 11  | 116,733,008           |                 | intergenic        |           |         |                      |                       |                   | 5E-13                                                     | [5]                         |
| <i>LINC02702, BUD13</i>  |                       | rs1558861          | 11  | 116,736,721           |                 | intergenic        |           |         |                      |                       |                   | 2E-6                                                      | [9]                         |
| <i>ZPR1 (ZNF259)</i>     |                       | rs964184           | 11  | 116,778,201           |                 | 3'-UTR            | c.*724C>G |         | np                   |                       |                   | 1E-26;<br>2E-26;<br>4E-18;<br>2E-163;<br>2E-78;<br>2E-316 | [8][12][13]<br>[20][21][22] |
| <i>IFT46</i>             |                       | rs7110984          | 11  | 118,571,519           |                 | intronic          |           |         |                      |                       |                   | 9E-9                                                      | [20]                        |
| <i>UBASH3B, GLULP3</i>   |                       | rs6589939          | 11  | 122,647,817           |                 | intergenic        |           |         |                      |                       |                   | 7E-10                                                     | [21]                        |
| <i>UBASH3B, GLULP3</i>   |                       | rs7941030          | 11  | 122,651,667           |                 | intergenic        |           |         |                      |                       |                   | 3E-13                                                     | [20]                        |
| <i>ST3GAL4</i>           | <i>ST3GAL4</i>        | rs112771035        | 11  | 126,355,981           |                 | intronic          |           |         |                      |                       |                   | 8E-55                                                     | [20]                        |
| <i>ST3GAL4</i>           |                       | rs1893351          | 11  | 126,357,131           |                 | intronic          |           |         |                      |                       |                   | 4E-10                                                     | [22]                        |
| <i>ST3GAL4</i>           |                       | rs59379014         | 11  | 126,358,105           |                 | intronic          |           |         |                      |                       |                   | 3E-43                                                     | [21]                        |
| <i>ST3GAL4</i>           |                       | rs11220462         | 11  | 126,374,057           |                 | intronic          |           |         |                      |                       |                   | 1E-15;<br>7E-21                                           | [8][12]                     |
| <i>ST3GAL4</i>           |                       | rs4307732          | 11  | 126,375,060           |                 | intronic          |           |         |                      |                       |                   | 3E-12                                                     | [13]                        |
| <i>B4GALNT3</i>          |                       | rs35882350         | 12  | 513,963               |                 | intronic          |           |         |                      |                       |                   | 2E-14;<br>5E-9;<br>2E-18                                  | [20][21][22]                |
| <i>CCND2</i>             |                       | rs76895963         | 12  | 4,275,678             |                 | intronic          |           |         |                      |                       |                   | 9E-11;<br>1E-21                                           | [20][22]                    |

| Mapped gene <sup>a</sup>  | Region | SNP <sup>b</sup> | Chr | Position <sup>c</sup> | LD <sup>d</sup> | Type <sup>e</sup> | cDNA      | Protein     | ClinVar <sup>f</sup> | Polyphen <sup>g</sup> | Sift <sup>h</sup> | p-value                  | References   |
|---------------------------|--------|------------------|-----|-----------------------|-----------------|-------------------|-----------|-------------|----------------------|-----------------------|-------------------|--------------------------|--------------|
| <i>CD163L1, CD163</i>     |        | rs117692263      | 12  | 7,472,418             |                 | intronic          |           |             |                      |                       |                   | 2E-8                     | [22]         |
| <i>LINC00612, VDAC2P2</i> |        | rs881376         | 12  | 9,050,157             |                 | intergenic        |           |             |                      |                       |                   | 5E-12                    | [20]         |
| <i>LINC00612, VDAC2P2</i> |        | rs201319146      | 12  | 9,053,207             |                 | intergenic        |           |             |                      |                       |                   | 2E-20                    | [22]         |
| <i>ETV6</i>               |        | rs117864888      | 12  | 11,744,963            |                 | intronic          |           |             |                      |                       |                   | 3E-8                     | [22]         |
| <i>KRAS</i>               |        | rs12318598       | 12  | 25,254,792            |                 | intergenic        |           |             |                      |                       |                   | 3E-11                    | [22]         |
| <i>ITPR2</i>              |        | rs1007938        | 12  | 26,649,616            |                 | intronic          |           |             |                      |                       |                   | 1E-8                     | [21]         |
| <i>ITPR2</i>              |        | rs111626763      | 12  | 26,681,872            |                 | splice region     |           |             | np                   |                       |                   | 2E-8                     | [22]         |
| <i>ERGIC2</i>             |        | rs10843391       | 12  | 29,355,709            |                 | intronic          |           |             |                      |                       |                   | 3E-8                     | [22]         |
| <i>RESF1</i>              |        | rs4931005        | 12  | 31,992,066            |                 | intronic          |           |             |                      |                       |                   | 2E-8                     | [22]         |
| <i>SLC2A13</i>            |        | rs10877955       | 12  | 40,027,315            |                 | intronic          |           |             |                      |                       |                   | 5E-13                    | [22]         |
| <i>SLC2A13, LINC02555</i> |        | rs2253736        | 12  | 40,139,535            |                 | intergenic        |           |             |                      |                       |                   | 2E-9                     | [20]         |
| <i>LIMA1</i>              |        | rs2160994        | 12  | 50,256,274            |                 | intronic          |           |             |                      |                       |                   | 7E-15;<br>4E-17          | [20][21]     |
| <i>SCN8A</i>              |        | chr12:51779544   | 12  | 51,779,544            |                 | intronic          |           |             |                      |                       |                   | 2E-11                    | [20]         |
| <i>R3HDM2</i>             |        | rs10649122       | 12  | 57,256,817            |                 | intronic          |           |             |                      |                       |                   | 2E-12                    | [20]         |
| <i>RAB21</i>              |        | rs61754230       | 12  | 71,785,666            |                 | missense          | c.671C>T  | p.Ser224Phe | np                   | probably<br>damaging  | deleterious       | 4E-12;<br>4E-15;<br>1E-8 | [16][20][21] |
| <i>SLC17A8</i>            |        | rs749921369      | 12  | 100,395,327           |                 | intergenic        |           |             |                      |                       |                   | 7E-11                    | [20]         |
| <i>WASHC4 (KIAA1033)</i>  |        | rs1663564        | 12  | 105,152,394           |                 | missense          | c.2701G>A | p.Val902Ile | np                   | benign                | tolerated         | 1E-8                     | [20]         |
| <i>MVK</i>                |        | rs71079573       | 12  | 109,583,090           |                 | intronic          |           |             |                      |                       |                   | 3E-8                     | [20]         |
| <i>ATXN2</i>              |        | rs597808         | 12  | 111,535,554           |                 | intronic          |           |             |                      |                       |                   | 4E-23;<br>2E-38          | [20][21]     |
| <i>BRAP, ATXN2-AS</i>     |        | rs11065987       | 12  | 111,634,620           |                 | intergenic        |           |             |                      |                       |                   | 2E-9;<br>1E-11           | [8][12]      |
| <i>RPH3A</i>              |        | rs233721         | 12  | 112,593,739           |                 | intronic          |           |             |                      |                       |                   | 2E-18                    | [21]         |
| <i>RPH3A</i>              |        | rs233716         | 12  | 112,602,139           |                 | intronic          |           |             |                      |                       |                   | 5E-13                    | [20]         |
| <i>KSR2</i>               |        | rs4767631        | 12  | 117,873,938           |                 | intronic          |           |             |                      |                       |                   | 6E-7                     | [7]          |
|                           |        |                  | 12  | 120,951,159           |                 | intergenic        |           |             |                      |                       |                   | 2E-8                     | [4]          |

| Mapped gene <sup>a</sup> | Region       | SNP <sup>d</sup> | Chr | Position <sup>c</sup> | LD <sup>d</sup> | Type <sup>e</sup> | cDNA         | Protein     | ClinVar <sup>f</sup> | Polyphen <sup>g</sup> | Sift <sup>h</sup> | p-value                             | References           |
|--------------------------|--------------|------------------|-----|-----------------------|-----------------|-------------------|--------------|-------------|----------------------|-----------------------|-------------------|-------------------------------------|----------------------|
| <i>HNF1A</i>             | <i>HNF1A</i> | rs1169288        | 12  | 120,978,847           |                 | missense          | c.79A>C      | p.Ile27Leu  | benign               | benign                | tolerated         | 1E-15;<br>6E-21;<br>4E-45;<br>3E-76 | [8][12][20]<br>[22]  |
| <i>HNF1A</i>             |              | rs1169294        | 12  | 120,988,791           |                 | intronic          |              |             |                      |                       |                   | 2E-27                               | [21]                 |
| <i>C12orf43</i>          |              | rs1169314        | 12  | 121,005,313           |                 | intronic          |              |             |                      |                       |                   | 2E-8                                | [13]                 |
| <i>DNAH10</i>            |              | rs11057353       | 12  | 123,781,140           |                 | missense          | c.499T>C     | p.Ser167Pro | benign               | benign                | tolerated         | 4E-12                               | [20]                 |
| <i>SCARB1</i>            |              | rs112403212      | 12  | 124,818,708           |                 | intronic          |              |             |                      |                       |                   | 1E-8                                | [21]                 |
| <i>SCARB1</i>            |              | rs11057830       | 12  | 124,822,507           |                 | intronic          |              |             |                      |                       |                   | 2E-15                               | [20]                 |
| <i>FBRSL1</i>            |              | rs12826964       | 12  | 132,564,267           |                 | intronic          |              |             |                      |                       |                   | 5E-9                                | [20]                 |
| <i>HMGB1, UBE2L5</i>     |              | rs1331698        | 13  | 30,442,842            |                 | intergenic        |              |             |                      |                       |                   | 8E-11                               | [22]                 |
| <i>BRCA2</i>             |              | rs4942486        | 13  | 32,379,251            |                 | intronic          | c.8755-66T>C |             | benign               |                       |                   | 2E-11                               | [12]                 |
| <i>BRCA2, IFIT1P1</i>    |              | rs2238162        | 13  | 32,385,062            |                 | intronic          |              |             |                      |                       |                   | 4E-15                               | [21]                 |
| <i>PDS5B - KL</i>        |              | chr13:32976656   | 13  | 32,976,656            |                 | intergenic        |              |             |                      |                       |                   | 8E-27;<br>4E-47                     | [20][22]             |
| <i>SETDB2</i>            |              | rs11386165       | 13  | 49,474,266            |                 | intronic          |              |             |                      |                       |                   | 5E-8                                | [22]                 |
| <i>DLEU1</i>             |              | rs201796         | 13  | 50,381,960            |                 | intergenic        |              |             |                      |                       |                   | 2E-8                                | [20]                 |
| <i>DLEU1</i>             |              | rs67854369       | 13  | 50,471,162            |                 | intergenic        |              |             |                      |                       |                   | 4E-9                                | [22]                 |
| <i>KLF12</i>             |              | rs112679104      | 13  | 74,132,814            |                 | intronic          |              |             |                      |                       |                   | 6E-10                               | [22]                 |
| <i>COL4A2</i>            |              | rs551473284      | 13  | 110,385,978           |                 | intronic          |              |             |                      |                       |                   | 2E-9;<br>1E-9                       | [20][21]             |
| <i>COL4A2</i>            |              | rs75816352       | 13  | 110,385,979           |                 | intronic          |              |             |                      |                       |                   | 7E-14                               | [22]                 |
| <i>GAS6-AS1, GAS6</i>    |              | rs7140110        | 13  | 113,841,051           |                 | intronic          |              |             |                      |                       |                   | 2E-28                               | [20]                 |
| <i>GAS6-AS1, GAS6</i>    |              | rs6602912        | 13  | 113,843,576           |                 | intronic          |              |             |                      |                       |                   | 6E-22                               | [21]                 |
| <i>GAS6</i>              |              | rs6602909        | 13  | 113,849,020           |                 | intronic          |              |             |                      |                       |                   | 3E-47                               | [22]                 |
|                          |              |                  | 14  | 24,402,720            |                 | intronic          |              |             |                      |                       |                   | 2E-8;<br>9E-23;<br>1E-19;<br>5E-43  | [13][20][21]<br>[22] |
|                          |              |                  | 14  | 24,414,681            |                 | missense          | c.2932G>A    | p.Ala978Thr | np                   | benign                | tolerated         | 4E-11;<br>3E-15                     | [8][12]              |
| <i>HECTD1 - HEATR5A</i>  |              | rs139262716      | 14  | 31,255,905            |                 | intergenic        |              |             |                      |                       |                   | 1E-8                                | [22]                 |
| <i>CFL2, RPL12P6</i>     |              | rs11846704       | 14  | 34,717,488            |                 | intergenic        |              |             |                      |                       |                   | 3E-9                                | [22]                 |

| Mapped gene <sup>a</sup> | Region | SNPid <sup>b</sup> | Chr | Position <sup>c</sup> | LD <sup>d</sup> | Type <sup>e</sup> | cDNA      | Protein     | ClinVar <sup>f</sup> | Polyphen <sup>g</sup> | Sift <sup>h</sup> | p-value                  | References   |
|--------------------------|--------|--------------------|-----|-----------------------|-----------------|-------------------|-----------|-------------|----------------------|-----------------------|-------------------|--------------------------|--------------|
| <i>RPL12P6, CFL2</i>     |        | rs10151517         | 14  | 34,718,046            |                 | intergenic        |           |             |                      |                       |                   | 5E-8                     | [20]         |
| <i>SYNE2</i>             |        | rs8008068          | 14  | 63,766,999            |                 | intronic          |           |             |                      |                       |                   | 4E-8                     | [21]         |
| <i>ESR2</i>              |        | chr14:64236436     | 14  | 64,236,436            |                 | intronic          |           |             |                      |                       |                   | 7E-12;<br>4E-17          | [20][22]     |
| <i>ADAM21P1, COX16</i>   |        | rs8005362          | 14  | 70,304,150            |                 | intergenic        |           |             |                      |                       |                   | 2E-25                    | [22]         |
| <i>ADAM20, MED6</i>      |        | rs6573971          | 14  | 70,544,752            |                 | intergenic        |           |             |                      |                       |                   | 3E-10                    | [21]         |
| <i>RN7SL77P, TTC9</i>    |        | rs9646133          | 14  | 70,629,627            |                 | intergenic        |           |             |                      |                       |                   | 5E-22                    | [16]         |
| <i>MAP3K9 - PCNX1</i>    |        | chr14:70874146     | 14  | 70,874,146            |                 | intergenic        |           |             |                      |                       |                   | 4E-14                    | [20]         |
| <i>ZFYVE1</i>            |        | rs61988556         | 14  | 72,972,550            |                 | intronic          |           |             |                      |                       |                   | 2E-9                     | [21]         |
| <i>MIDEAS</i>            |        | rs13379043         | 14  | 73,783,423            |                 | intronic          |           |             |                      |                       |                   | 2E-6;<br>4E-13;<br>8E-24 | [16][20][22] |
|                          |        |                    | 14  | 94,301,859            |                 | intergenic        |           |             |                      |                       |                   | 4E-12                    | [21]         |
|                          |        |                    | 14  | 94,378,610            |                 | missense          | c.1096G>A | p.Glu366Lys | pathogenic           | probably<br>damaging  | deleterious       | 1E-21                    | [16]         |
|                          |        |                    | 14  | 94,380,925            |                 | missense          | c.863A>T  | p.Glu288Val | conflicting          | probably<br>damaging  | deleterious       | 2E-15;<br>4E-30          | [20][22]     |
| <i>LINC00637, ATP5MJ</i> |        | rs12891477         | 14  | 103,866,422           |                 | intergenic        |           |             |                      |                       |                   | 3E-12                    | [22]         |
| <i>SECISBP2L</i>         |        | rs7164309          | 15  | 49,025,561            |                 | intronic          |           |             |                      |                       |                   | 3E-9                     | [20]         |
| <i>FAM227B</i>           |        | rs10851478         | 15  | 49,536,822            |                 | intronic          |           |             |                      |                       |                   | 6E-9                     | [21]         |
| <i>FAM227B</i>           |        | rs566865466        | 15  | 49,550,054            |                 | intronic          |           |             |                      |                       |                   | 6E-12                    | [22]         |
| <i>WDR72</i>             |        | rs79391862         | 15  | 53,447,229            |                 | intergenic        |           |             |                      |                       |                   | 9E-11                    | [22]         |
|                          |        |                    | 15  | 57,220,086            |                 | intronic          |           |             |                      |                       |                   | 2E-9                     | [21]         |
|                          |        |                    | 15  | 57,240,500            |                 | intronic          |           |             |                      |                       |                   | 4E-17                    | [20]         |
|                          |        |                    | 15  | 58,391,167            |                 | intronic          |           |             |                      |                       |                   | 9E-16                    | [21]         |
|                          |        |                    | 15  | 58,430,392            |                 | intronic          |           |             |                      |                       |                   | 1E-43                    | [22]         |
|                          |        |                    | 15  | 58,434,545            |                 | intronic          |           |             |                      |                       |                   | 9E-18                    | [21]         |
| <i>ADAM10</i>            |        | chr15:58679807     | 15  | 58,679,807            |                 | intronic          |           |             |                      |                       |                   | 2E-30                    | [20]         |
| <i>C2CD4A, NPM1P47</i>   |        | rs72749770         | 15  | 62,073,266            |                 | intergenic        |           |             |                      |                       |                   | 9E-10                    | [22]         |
| <i>TPM1</i>              |        | rs76162994         | 15  | 63,036,763            |                 | intergenic        |           |             |                      |                       |                   | 4E-8                     | [22]         |
| <i>USP3, LINC02568</i>   |        | rs11636087         | 15  | 63,496,068            |                 | intergenic        |           |             |                      |                       |                   | 2E-17                    | [22]         |

| Mapped gene <sup>a</sup> | Region        | SNPId <sup>b</sup> | Chr | Position <sup>c</sup> | LD <sup>d</sup> | Type <sup>e</sup> | cDNA      | Protein     | ClinVar <sup>f</sup> | Polyphen <sup>g</sup> | Sift <sup>h</sup> | p-value                     | References   |
|--------------------------|---------------|--------------------|-----|-----------------------|-----------------|-------------------|-----------|-------------|----------------------|-----------------------|-------------------|-----------------------------|--------------|
| <i>USP3, LINC02568</i>   |               | rs62011285         | 15  | 63,498,864            |                 | intergenic        |           |             |                      |                       |                   | 2E-8                        | [21]         |
| <i>USP3, LINC02568</i>   |               | rs56369308         | 15  | 63,500,058            |                 | intergenic        |           |             |                      |                       |                   | 1E-12                       | [20]         |
| <i>LMAN1L</i>            |               | rs112987086        | 15  | 74,814,378            |                 | intronic          |           |             |                      |                       |                   | 1E-11                       | [21]         |
| <i>LMAN1L</i>            |               | rs12917376         | 15  | 74,823,826            |                 | intronic          |           |             |                      |                       |                   | 4E-8                        | [20]         |
| <i>SCAMP2, MPI</i>       |               | rs9673065          | 15  | 74,888,551            |                 | intergenic        |           |             |                      |                       |                   | 2E-11                       | [22]         |
| <i>CRTC3, IQGAP1</i>     |               | rs56402930         | 15  | 90,529,730            |                 | intergenic        |           |             |                      |                       |                   | 8E-6                        | [21]         |
| <i>CRTC3</i>             |               | rs6496691          | 15  | 90,566,379            |                 | intronic          |           |             |                      |                       |                   | 2E-9                        | [22]         |
| <i>PCSK6</i>             |               | rs34631529         | 15  | 101,305,277           |                 | missense          | c.2891C>T | p.Thr964Met | likely benign        | probably damaging     | deleterious       | 6E-9                        | [22]         |
| <i>LITAF</i>             |               | rs12445804         | 16  | 11,612,244            |                 | intronic          |           |             |                      |                       |                   | 7E-14;<br>8E-9;<br>5E-23    | [20][21][22] |
| <i>Y_RNA, MIR193BHG</i>  |               | rs246179           | 16  | 14,287,318            |                 | intergenic        |           |             |                      |                       |                   | 8E-9                        | [22]         |
| <i>STX1B</i>             |               | rs12920772         | 16  | 31,001,460            |                 | intronic          |           |             |                      |                       |                   | 8E-11                       | [20]         |
| <i>FTO</i>               |               | rs62033400         | 16  | 53,777,876            |                 | intronic          |           |             |                      |                       |                   | 1E-11                       | [21]         |
| <i>CETP, HERPUD1</i>     | <i>CETP</i>   | rs247617           | 16  | 56,956,804            |                 | intergenic        |           |             |                      |                       |                   | 2E-24                       | [13]         |
| <i>HERPUD1, CETP</i>     |               | rs183130           | 16  | 56,957,451            |                 | intergenic        |           |             | association          |                       |                   | 8E-59                       | [20]         |
| <i>HERPUD1, CETP</i>     |               | rs3764261          | 16  | 56,959,412            |                 | intergenic        |           |             | no interp.           |                       |                   | 9E-13;<br>2E-34;<br>1E-49   | [8][12][21]  |
| <i>WWP2</i>              |               | rs78432537         | 16  | 69,839,928            |                 | intronic          |           |             |                      |                       |                   | 5E-9                        | [20]         |
| <i>HYDIN</i>             |               | rs56212732         | 16  | 70,896,467            |                 | intronic          |           |             |                      |                       |                   | 2E-9                        | [21]         |
| <i>HYDIN</i>             |               | rs145090930        | 16  | 70,922,412            |                 | intronic          |           |             |                      |                       |                   | 1E-11                       | [20]         |
| <i>MARVELD3, TAT-AS1</i> | <i>TNXL4B</i> | rs9929977          | 16  | 71,605,150            |                 | intergenic        |           |             |                      |                       |                   | 1E-14                       | [21]         |
| <i>DHODH</i>             |               | rs11648003         | 16  | 72,018,449            |                 | intronic          |           |             |                      |                       |                   | 2E-20                       | [13]         |
| <i>TXNL4B, HPR</i>       |               | rs34042070         | 16  | 72,067,626            |                 | intronic          |           |             |                      |                       |                   | 5E-105;<br>2E-73;<br>1E-177 | [20][21][22] |
| <i>HPR, TXNL4B</i>       |               | rs2000999          | 16  | 72,074,194            |                 | intronic          |           |             |                      |                       |                   | 2E-22;<br>4E-41             | [8][12]      |
| <i>PMFBP1, LINC01572</i> |               | rs7202323          | 16  | 72,183,214            |                 | intergenic        |           |             |                      |                       |                   | 8E-25                       | [21]         |
| <i>MAF</i>               |               | rs1862719          | 16  | 79,470,160            |                 | intronic          |           |             |                      |                       |                   | 8E-11                       | [22]         |

| Mapped gene <sup>a</sup> | Region        | SNPId <sup>b</sup> | Chr | Position <sup>c</sup> | LD <sup>d</sup> | Type <sup>e</sup> | cDNA       | Protein     | ClinVar <sup>f</sup> | Polyphen <sup>g</sup> | Sift <sup>h</sup> | p-value                   | References   |
|--------------------------|---------------|--------------------|-----|-----------------------|-----------------|-------------------|------------|-------------|----------------------|-----------------------|-------------------|---------------------------|--------------|
| <i>OSGIN1, MLYCD</i>     |               | rs4782568          | 16  | 83,946,924            |                 | intronic          |            |             |                      |                       |                   | 8E-15;<br>6E-15;<br>1E-24 | [20][21][22] |
| <i>ZFPM1</i>             |               | rs139829677        | 16  | 88,502,880            |                 | intronic          |            |             |                      |                       |                   | 1E-13                     | [22]         |
| <i>ZFPM1</i>             |               | rs147032017        | 16  | 88,514,388            |                 | synonymous        | c.270C>T   | p.Asp90=    | np                   |                       | tolerated         | 5E-9                      | [16]         |
| <i>ZFPM1-AS1, ZFPM1</i>  |               | rs77013160         | 16  | 88,516,463            |                 | intronic          |            |             |                      |                       |                   | 6E-9;<br>2E-8             | [20][21]     |
| <i>WDR81</i>             |               | rs11431553         | 17  | 1,719,561             |                 | intronic          |            |             |                      |                       |                   | 3E-10                     | [22]         |
| <i>DPH1</i>              |               | rs7207466          | 17  | 2,039,567             |                 | intronic          |            |             |                      |                       |                   | 6E-10                     | [22]         |
| <i>ASGR1</i>             |               | rs55714927         | 17  | 7,176,997             |                 | synonymous        | c.267G>A   | p.Lys89=    | np                   |                       | tolerated         | 9E-12;<br>7E-37;<br>4E-23 | [13][20][21] |
| <i>DLG4</i>              |               | rs314253           | 17  | 7,188,331             |                 | 3'-UTR            | c.*2377A>G |             | np                   |                       |                   | 3E-10                     | [12]         |
| <i>TP53</i>              |               | rs9894946          | 17  | 7,667,762             |                 | intronic          |            |             |                      |                       |                   | 2E-9                      | [21]         |
| <i>RAI1</i>              |               | rs71367412         | 17  | 17,717,693            |                 | intronic          |            |             |                      |                       |                   | 6E-9                      | [20]         |
| <i>VTN</i>               |               | rs704              | 17  | 28,367,840            |                 | missense          | c.1199C>T  | p.Thr400Met | np                   | benign                | tolerated         | 5E-29;<br>3E-15;<br>9E-13 | [16][20][21] |
| <i>TAOK1, ABHD15</i>     |               | rs56208742         | 17  | 29,557,649            |                 | intergenic        |            |             |                      |                       |                   | 1E-11;<br>2E-8            | [20][21]     |
| <i>NF1</i>               |               | rs12603885         | 17  | 31,139,704            |                 | intronic          |            |             |                      |                       |                   | 3E-14;<br>1E-14           | [20][21]     |
| <i>NF1</i>               |               | rs11080150         | 17  | 31,302,308            |                 | intronic          |            |             |                      |                       |                   | 1E-7                      | [16]         |
| <i>STAT5A</i>            |               | rs28727898         | 17  | 42,297,600            |                 | intronic          |            |             |                      |                       |                   | 2E-9                      | [20]         |
| <i>EFCAB13</i>           | <i>OSBPL7</i> | rs7206971          | 17  | 47,347,749            |                 | intronic          |            |             |                      |                       |                   | 4E-9;<br>3E-7;<br>4E-10   | [8][12][13]  |
| <i>NPEPPS</i>            |               | rs36043200         | 17  | 47,552,040            |                 | intronic          |            |             |                      |                       |                   | 1E-36                     | [21]         |
| <i>NPEPPS</i>            |               | rs10445374         | 17  | 47,585,017            |                 | intronic          |            |             |                      |                       |                   | 2E-46                     | [20]         |
| <i>LINC02086</i>         |               | rs3110609          | 17  | 48,676,181            |                 | intergenic        |            |             |                      |                       |                   | 3E-12                     | [21]         |
| <i>LINC02086</i>         |               | rs3096644          | 17  | 48,680,213            |                 | intergenic        |            |             |                      |                       |                   | 3E-13                     | [20]         |
| <i>APOH</i>              | <i>APOH</i>   | rs1801689          | 17  | 66,214,462            |                 | missense          | c.973T>G   | p.Cys325Gly | np                   | probably<br>damaging  | deleterious       | 1E-11;<br>1E-30;<br>2E-24 | [12][20][21] |
| <i>ARSG</i>              | <i>ABCA6</i>  | rs12936113         | 17  | 68,404,922            |                 | intronic          |            |             |                      |                       |                   | 2E-8                      | [21]         |



| Mapped gene <sup>a</sup> | Region       | SNPId <sup>b</sup> | Chr | Position <sup>c</sup> | LD <sup>d</sup> | Type <sup>e</sup> | cDNA         | Protein      | ClinVar <sup>f</sup> | Polyphen <sup>g</sup> | Sift <sup>h</sup> | p-value                              | References           |
|--------------------------|--------------|--------------------|-----|-----------------------|-----------------|-------------------|--------------|--------------|----------------------|-----------------------|-------------------|--------------------------------------|----------------------|
| <i>ABCA6</i>             | <i>ABCA6</i> | rs77542162         | 17  | 69,085,137            |                 | missense          | c.4075T>C    | p.Cys1359Arg | np                   | probably<br>damaging  | deleterious       | 2E-18;<br>2E-98;<br>6E-74;<br>3E-169 | [13][20][21]<br>[22] |
| <i>ABCA10</i>            |              | rs72631343         | 17  | 69,195,129            |                 | intronic          |              |              |                      |                       |                   | 5E-21                                | [21]                 |
| <i>H3-3B</i>             |              | rs73352129         | 17  | 75,782,528            |                 | intronic          |              |              |                      |                       |                   | 1E-13                                | [20]                 |
| <i>UNK</i>               |              | rs2125345          | 17  | 75,786,110            |                 | intronic          |              |              |                      |                       |                   | 3E-22                                | [16]                 |
| <i>TRIM65</i>            |              | rs56000661         | 17  | 75,882,573            |                 | intronic          |              |              |                      |                       |                   | 1E-23                                | [22]                 |
| <i>PGS1</i>              |              | rs12948394         | 17  | 78,386,710            |                 | intronic          |              |              |                      |                       |                   | 5E-15;<br>5E-18;<br>2E-25            | [20][21][22]         |
| <i>FO XK2</i>            |              | rs3736206          | 17  | 82,572,553            |                 | intronic          |              |              |                      |                       |                   | 2E-9                                 | [22]                 |
| <i>B3GNTL1</i>           |              | rs111571253        | 17  | 83,051,228            |                 | intronic          |              |              |                      |                       |                   | 1E-8                                 | [22]                 |
| <i>CTAGE1</i>            |              | rs79588679         | 18  | 22,327,807            |                 | intergenic        |              |              |                      |                       |                   | 4E-8                                 | [13]                 |
| <i>NPC1</i>              | <i>NPC1</i>  | rs2510344          | 18  | 23,533,321            |                 | intronic          | c.3754+34A>G |              | benign               |                       |                   | 2E-9                                 | [22]                 |
| <i>TAF4B</i>             |              | rs12960731         | 18  | 26,338,309            |                 | intronic          |              |              |                      |                       |                   | 8E-7                                 | [17]                 |
| <i>LIPG</i>              | <i>LIPG</i>  | rs77960347         | 18  | 49,583,585            |                 | missense          | c.1187A>G    | p.Asn396Ser  | np                   | probably<br>damaging  | tolerated         | 6E-14;<br>8E-15;<br>3E-24            | [20][21][22]         |
| <i>LIPG, SMUG1P1</i>     |              | rs7241918          | 18  | 49,634,583            |                 | intergenic        |              |              |                      |                       |                   | 1E-8                                 | [21]                 |
| <i>ATP8B1</i>            |              | rs369298568        | 18  | 57,651,800            |                 | intronic          |              |              |                      |                       |                   | 5E-12                                | [22]                 |
| <i>THOP1</i>             |              | rs2741991          | 19  | 2,802,094             |                 | intronic          |              |              |                      |                       |                   | 3E-9                                 | [20]                 |
| <i>THOP1</i>             |              | rs1640273          | 19  | 2,803,229             |                 | intronic          |              |              |                      |                       |                   | 4E-11                                | [22]                 |
| <i>HDGFL2</i>            |              | rs111174163        | 19  | 4,492,942             |                 | intronic          |              |              |                      |                       |                   | 9E-10                                | [22]                 |
| <i>S1PR5, ATG4D</i>      | <i>LDLR</i>  | rs549956721        | 19  | 10,526,288            |                 | intergenic        |              |              |                      |                       |                   | 2E-10                                | [21]                 |
| <i>DNM2</i>              |              | chr19:10734951     | 19  | 10,734,951            |                 | intronic          |              |              |                      |                       |                   | 7E-10                                | [15]                 |
| <i>YIPF2 - SMARCA4</i>   |              | chr19:10948031     | 19  | 10,948,031            |                 | intergenic        |              |              |                      |                       |                   | 1E-11                                | [15]                 |
| <i>SMARCA4</i>           |              | rs1122608          | 19  | 11,052,925            |                 | intronic          |              |              |                      |                       |                   | 1E-14                                | [19]                 |
| <i>SMARCA4</i>           |              | rs10423733         | 19  | 11,075,243            |                 | intronic          |              |              |                      |                       |                   | 3E-428                               | [20]                 |
| <i>SMARCA4</i>           |              | rs143020224        | 19  | 11,076,648            |                 | intronic          |              |              |                      |                       |                   | 9E-605                               | [21]                 |
| <i>SMARCA4</i>           |              | rs112374545        | 19  | 11,078,223            |                 | intronic          |              |              |                      |                       |                   | 7E-142                               | [13]                 |

| Mapped gene <sup>a</sup> | Region | SNPid <sup>b</sup> | Chr | Position <sup>c</sup> | LD <sup>d</sup> | Type <sup>e</sup> | cDNA         | Protein     | ClinVar <sup>f</sup> | Polyphen <sup>g</sup> | Sift <sup>h</sup> | p-value                                         | References            |
|--------------------------|--------|--------------------|-----|-----------------------|-----------------|-------------------|--------------|-------------|----------------------|-----------------------|-------------------|-------------------------------------------------|-----------------------|
|                          |        |                    | 19  | 11,084,354            |                 | intronic          |              |             |                      |                       |                   | 2E-7                                            | [6]                   |
|                          |        |                    | 19  | 11,091,630            |                 | intronic          | c.67+2015G>T |             | benign               |                       |                   | 2E-26;<br>2E-51;<br>4E-26;<br>4E-117;<br>4E-262 | [1][2][4][8]<br>[12]  |
|                          |        |                    | 19  | 11,100,236            |                 | synonymous        | c.81C>T      | p.Cys27=    | benign               |                       | tolerated         | 4E-14                                           | [5]                   |
|                          |        |                    | 19  | 11,116,804            |                 | intronic          | c.1706-55A>C |             | benign               |                       |                   | 4E-89                                           | [21]                  |
|                          |        |                    | 19  | 11,127,797            |                 | intronic          |              |             |                      |                       |                   | 7E-6                                            | [9]                   |
|                          |        |                    | 19  | 11,198,502            |                 | intergenic        |              |             |                      |                       |                   | 2E-23                                           | [15]                  |
|                          |        |                    | 19  | 11,224,801            |                 | intronic          |              |             |                      |                       |                   | 6E-16                                           | [21]                  |
| <i>RGL3</i>              |        | chr19:11398422     | 19  | 11,398,422            |                 | intronic          |              |             |                      |                       |                   | 5E-15                                           | [15]                  |
| <i>ECSIT</i>             |        | chr19:11507217     | 19  | 11,507,217            |                 | intronic          |              |             |                      |                       |                   | 3E-8                                            | [15]                  |
| <i>ZNF441 - ZNF491</i>   |        | chr19:11789826     | 19  | 11,789,826            |                 | intergenic        |              |             |                      |                       |                   | 2E-7                                            | [15]                  |
| <i>ZNF788P, ZNF20</i>    |        | rs117590032        | 19  | 12,095,815            |                 | intronic          |              |             |                      |                       |                   | 5E-8                                            | [20]                  |
| <i>CYP4F12</i>           |        | rs4808360          | 19  | 15,687,205            |                 | intronic          |              |             |                      |                       |                   | 8E-10                                           | [21]                  |
| <i>PDE4C</i>             |        | rs62120394         | 19  | 18,227,899            |                 | intronic          |              |             |                      |                       |                   | 6E-12                                           | [21]                  |
| <i>PDE4C</i>             |        | rs8112975          | 19  | 18,230,100            |                 | intronic          |              |             |                      |                       |                   | 6E-12                                           | [20]                  |
|                          |        |                    | 19  | 19,259,532            |                 | intronic          |              |             |                      |                       |                   | 3E-11                                           | [14]                  |
|                          |        |                    | 19  | 19,268,740            |                 | missense          | c.499G>A     | p.Glu167Lys | np                   | possibly<br>damaging  | tolerated         | 3E-186                                          | [20]                  |
|                          |        |                    | 19  | 19,277,691            |                 | intronic          |              |             |                      |                       |                   | 2E-158                                          | [21]                  |
|                          |        |                    | 19  | 19,285,807            |                 | intronic          |              |             |                      |                       |                   | 9E-37                                           | [21]                  |
|                          |        |                    | 19  | 19,296,909            |                 | intronic          |              |             |                      |                       |                   | 2E-8;<br>7E-22;<br>1E-11;<br>3E-54;<br>3E-8     | [4][8][9][12]<br>[19] |
|                          |        |                    | 19  | 19,349,732            |                 | intronic          |              |             |                      |                       |                   | 3E-23                                           | [13]                  |
|                          |        |                    | 19  | 19,394,368            |                 | intronic          |              |             |                      |                       |                   | 4E-8                                            | [15]                  |
|                          |        |                    | 19  | 19,494,483            |                 | intronic          |              |             |                      |                       |                   | 2E-7                                            | [15]                  |

| Mapped gene <sup>a</sup> | Region | SNPid <sup>b</sup> | Chr | Position <sup>c</sup> | LD <sup>d</sup> | Type <sup>e</sup> | cDNA      | Protein     | ClinVar <sup>f</sup> | Polyphen <sup>g</sup> | Sift <sup>h</sup> | p-value          | References |
|--------------------------|--------|--------------------|-----|-----------------------|-----------------|-------------------|-----------|-------------|----------------------|-----------------------|-------------------|------------------|------------|
|                          |        |                    | 19  | 19,547,663            |                 | intergenic        |           |             |                      |                       |                   | 3E-9;<br>3E-8    | [1][2]     |
|                          |        |                    | 19  | 19,678,719            |                 | intronic          |           |             |                      |                       |                   | 3E-6             | [5]        |
|                          |        |                    | 19  | 19,727,152            |                 | intronic          |           |             |                      |                       |                   | 3E-8             | [15]       |
| ZNF826P                  |        | rs144984216        | 19  | 20,369,092            |                 | intronic          |           |             |                      |                       |                   | 3E-8             | [21]       |
| ZNF486 - ZNF737          |        | chr19:20439917     | 19  | 20,439,917            |                 | intergenic        |           |             |                      |                       |                   | 7E-14            | [20]       |
| CYP2A6                   |        | rs56113850         | 19  | 40,847,202            |                 | intronic          |           |             |                      |                       |                   | 2E-10            | [21]       |
| CYP2A6                   |        | rs56267346         | 19  | 40,847,433            |                 | intronic          |           |             |                      |                       |                   | 3E-14            | [20]       |
| ZNF574                   |        | rs201596848        | 19  | 42,080,806            |                 | missense          | c.2200C>T | p.Arg734Cys | np                   | possibly<br>damaging  | tolerated         | 1E-11            | [16]       |
| POU2F2                   |        | chr19:42103100     | 19  | 42,103,100            |                 | intronic          |           |             |                      |                       |                   | 2E-8             | [15]       |
| XRCC1                    |        | chr19:43545210     | 19  | 43,545,210            |                 | intronic          |           |             |                      |                       |                   | 1E-7             | [15]       |
| XRCC1                    |        | rs2021092          | 19  | 43,564,554            |                 | intronic          |           |             |                      |                       |                   | 9E-10            | [21]       |
| XRCC1                    |        | rs3213282          | 19  | 43,568,728            |                 | intronic          |           |             |                      |                       |                   | 3E-11            | [20]       |
| CEACAM20                 |        | rs62116889         | 19  | 44,518,526            |                 | intronic          |           |             |                      |                       |                   | 2E-33            | [21]       |
| CEACAM20 - IGSF23        |        | chr19:44603140     | 19  | 44,603,140            |                 | intergenic        |           |             |                      |                       |                   | 3E-7             | [15]       |
| IGSF23                   |        | rs62119267         | 19  | 44,631,381            |                 | intronic          |           |             |                      |                       |                   | 9E-295           | [20]       |
| CEACAM16-AS1, BCL3       |        | rs1551891          | 19  | 44,728,555            |                 | intergenic        |           |             |                      |                       |                   | 4E-490           | [21]       |
|                          |        |                    | 19  | 44,844,654            |                 | intergenic        |           |             |                      |                       |                   | 7E-343           | [21]       |
|                          |        |                    | 19  | 44,888,997            |                 | 3'-UTR            | c.*618C>T |             | np                   |                       |                   | 1E-711           | [21]       |
|                          |        |                    | 19  | 44,892,009            |                 | intronic          |           |             |                      |                       |                   | 2E-19;<br>5E-8   | [5][6]     |
|                          |        |                    | 19  | 44,908,822            |                 | missense          | c.526C>T  | p.Arg176Cys | drug response        | probably<br>damaging  | deleterious       | 3E-19;<br>1E-17  | [14][18]   |
|                          |        |                    | 19  | 44,909,976            |                 | intergenic        |           |             |                      |                       |                   | 5E-324;<br>5E-50 | [13][15]   |
|                          |        |                    | 19  | 44,918,393            |                 | intronic          |           |             |                      |                       |                   | 4E-323           | [22]       |

| Mapped gene <sup>a</sup> | Region | SNPid <sup>b</sup> | Chr | Position <sup>c</sup> | LD <sup>d</sup> | Type <sup>e</sup> | cDNA      | Protein | ClinVar <sup>f</sup> | Polyphen <sup>g</sup> | Sift <sup>h</sup> | p-value                                                                                 | References                             |
|--------------------------|--------|--------------------|-----|-----------------------|-----------------|-------------------|-----------|---------|----------------------|-----------------------|-------------------|-----------------------------------------------------------------------------------------|----------------------------------------|
|                          |        |                    | 19  | 44,919,689            |                 | downstream        | c.*459A>G |         | no interp.           |                       |                   | 3E-43;<br>1E-60;<br>1E-20;<br>4E-27;<br>9E-147;<br>2E-40;<br>1E-14;<br>2E-178;<br>5E-35 | [1][2][3][4]<br>[8][9][11]<br>[12][19] |
|                          |        |                    | 19  | 44,987,027            |                 | intronic          |           |         |                      |                       |                   | 9E-9                                                                                    | [21]                                   |
|                          |        |                    | 19  | 45,114,005            |                 | intronic          |           |         |                      |                       |                   | 5E-17                                                                                   | [21]                                   |
|                          |        |                    | 19  | 45,531,618            |                 | intronic          |           |         |                      |                       |                   | 2E-9                                                                                    | [15]                                   |
|                          |        |                    | 19  | 45,791,965            |                 | intronic          |           |         |                      |                       |                   | 2E-45                                                                                   | [20]                                   |
|                          |        |                    | 19  | 45,933,306            |                 | intergenic        |           |         |                      |                       |                   | 2E-31                                                                                   | [21]                                   |
| <i>IGFL1, IGFL1P2</i>    |        | rs145725232        | 19  | 46,249,284            |                 | intergenic        |           |         |                      |                       |                   | 8E-7                                                                                    | [21]                                   |
| <i>HNRNPMP2, SLC1A5</i>  |        | rs16980741         | 19  | 46,792,101            |                 | intergenic        |           |         |                      |                       |                   | 3E-8                                                                                    | [20]                                   |
| <i>FUT2</i>              |        | rs516316           | 19  | 48,702,888            |                 | intronic          |           |         |                      |                       |                   | 1E-61;<br>1E-46                                                                         | [20][21]                               |
| <i>ZNF667-AS1</i>        |        | rs61469827         | 19  | 56,500,104            |                 | intergenic        |           |         |                      |                       |                   | 3E-8                                                                                    | [20]                                   |
| <i>ZNF329</i>            |        | rs35081008         | 19  | 58,150,868            |                 | intergenic        |           |         |                      |                       |                   | 3E-23;<br>1E-27;<br>9E-35                                                               | [20][21][22]                           |
| <i>ZNF329, ZNF274</i>    |        | rs117492019        | 19  | 58,170,494            |                 | intergenic        |           |         |                      |                       |                   | 1E-8                                                                                    | [13]                                   |
| <i>RBCK1</i>             |        | rs6139104          | 20  | 409,666               |                 | intronic          |           |         |                      |                       |                   | 2E-11                                                                                   | [22]                                   |
| <i>GPCPD1</i>            |        | rs73075609         | 20  | 5,600,143             |                 | intronic          |           |         |                      |                       |                   | 1E-11;<br>2E-8;<br>2E-16                                                                | [20][21][22]                           |
| <i>LINC01723</i>         |        | rs438568           | 20  | 12,978,039            |                 | intergenic        |           |         |                      |                       |                   | 1E-9;<br>4E-9;<br>7E-16                                                                 | [20][21][22]                           |
| <i>LINC01723</i>         |        | rs364585           | 20  | 12,982,070            |                 | intergenic        |           |         |                      |                       |                   | 4E-10                                                                                   | [12]                                   |
| <i>BANF2, RNU6-192P</i>  |        | rs61433703         | 20  | 17,823,423            |                 | intergenic        |           |         |                      |                       |                   | 3E-8                                                                                    | [21]                                   |
| <i>RNU6-192P</i>         |        | rs2618568          | 20  | 17,863,324            |                 | intergenic        |           |         |                      |                       |                   | 7E-15                                                                                   | [13]                                   |
| <i>RNU6-192P</i>         |        | rs2618567          | 20  | 17,863,848            |                 | intergenic        |           |         |                      |                       |                   | 8E-41;<br>3E-73                                                                         | [20][22]                               |

| Mapped gene <sup>a</sup> | Region       | SNPid <sup>b</sup> | Chr | Position <sup>c</sup> | LD <sup>d</sup> | Type <sup>e</sup> | cDNA      | Protein     | ClinVar <sup>f</sup>    | Polyphen <sup>g</sup> | Sift <sup>h</sup> | p-value                              | References           |
|--------------------------|--------------|--------------------|-----|-----------------------|-----------------|-------------------|-----------|-------------|-------------------------|-----------------------|-------------------|--------------------------------------|----------------------|
| <i>RNU6-192P</i>         |              | rs2618566          | 20  | 17,864,040            |                 | intergenic        |           |             |                         |                       |                   | 1E-29                                | [21]                 |
| <i>RNU6-192P</i>         |              | rs2328223          | 20  | 17,865,277            |                 | intergenic        |           |             |                         |                       |                   | 6E-9                                 | [12]                 |
| <i>ENTPD6</i>            |              | rs1044573          | 20  | 25,226,018            |                 | 3'-UTR            | c.*421A>G |             | np                      |                       |                   | 4E-13                                | [22]                 |
| <i>PYGB, ENTPD6</i>      |              | rs6050463          | 20  | 25,228,354            |                 | intergenic        |           |             |                         |                       |                   | 6E-9;<br>2E-9                        | [20][21]             |
| <i>EIFE2S2 - ASIP</i>    |              | chr20:34120437     | 20  | 34,120,437            |                 | intergenic        |           |             |                         |                       |                   | 4E-21                                | [20]                 |
| <i>FER1L4</i>            |              | rs224424           | 20  | 35,560,231            |                 | intergenic        |           |             |                         |                       |                   | 3E-16                                | [21]                 |
| <i>DHX35 - MAFB</i>      |              | chr20:38966760     | 20  | 38,966,760            |                 | intronic          |           |             |                         |                       |                   | 5E-8                                 | [15]                 |
| <i>DHX35 - MAFB</i>      |              | chr20:39116691     | 20  | 39,116,691            |                 | intergenic        |           |             |                         |                       |                   | 4E-8                                 | [15]                 |
| <i>LOC105372618</i>      |              | rs2902940          | 20  | 40,462,847            |                 | intronic          |           |             |                         |                       |                   | 1E-8;<br>2E-11                       | [8][12]              |
| <i>DHX35 - MAFB</i>      |              | rs1883711          | 20  | 40,551,182            |                 | intergenic        |           |             |                         |                       |                   | 4E-16;<br>4E-96;<br>1E-63;<br>4E-171 | [13][20][21]<br>[22] |
| <i>DHX35 - MAFB</i>      |              | rs191064657        | 20  | 40,563,663            |                 | intergenic        |           |             |                         |                       |                   | 9E-10                                | [21]                 |
| <i>DHX35 - MAFB</i>      |              | rs6102059          | 20  | 40,600,144            |                 | intergenic        |           |             |                         |                       |                   | 4E-9                                 | [4]                  |
| <i>TOP1</i>              |              | rs6029526          | 20  | 41,043,978            |                 | intronic          |           |             |                         |                       |                   | 3E-19;<br>5E-18                      | [8][12]              |
| <i>PLCG1</i>             |              | rs6093446          | 20  | 41,152,292            |                 | intronic          |           |             |                         |                       |                   | 7E-22                                | [21]                 |
| <i>PLCG1</i>             |              | rs753381           | 20  | 41,168,825            |                 | missense          | c.2438T>C | p.Ile813Thr | np                      | benign                | tolerated         | 7E-8                                 | [19]                 |
| <i>CHD6</i>              |              | rs2866745          | 20  | 41,606,278            |                 | intronic          |           |             |                         |                       |                   | 1E-21                                | [20]                 |
| <i>HNF4A</i>             | <i>HNF4A</i> | rs1800961          | 20  | 44,413,724            |                 | missense          | c.416C>T  | p.Thr139Ile | benign/likely<br>benign | benign                | tolerated         | 5E-28;<br>4E-23                      | [20][21]             |
| <i>PLTP</i>              | <i>PLTP</i>  | rs6065904          | 20  | 45,906,012            |                 | intronic          |           |             |                         |                       |                   | 5E-13                                | [20]                 |
| <i>PCIF1, PLTP</i>       |              | rs6073958          | 20  | 45,923,216            |                 | intergenic        |           |             |                         |                       |                   | 3E-11                                | [21]                 |
| <i>SUMO1P1, BCAS1</i>    |              | rs6022850          | 20  | 53,918,861            |                 | intergenic        |           |             |                         |                       |                   | 9E-11                                | [22]                 |
| <i>NTSR1</i>             |              | rs3746778          | 20  | 62,710,120            |                 | intronic          |           |             |                         |                       |                   | 1E-15                                | [22]                 |
| <i>SLC2A4RG</i>          |              | rs2256814          | 20  | 63,742,630            |                 | intronic          |           |             |                         |                       |                   | 7E-9                                 | [21]                 |
| <i>TCEA2</i>             |              | rs6090040          | 20  | 64,060,707            |                 | intronic          |           |             |                         |                       |                   | 1E-8;<br>8E-19                       | [20][22]             |
| <i>TCEA2</i>             |              | rs6062343          | 20  | 64,064,578            |                 | intronic          |           |             |                         |                       |                   | 1E-6                                 | [16]                 |
| <i>PCMTD2</i>            |              | rs6090101          | 20  | 64,278,167            |                 | intronic          |           |             |                         |                       |                   | 3E-11                                | [21]                 |

| Mapped gene <sup>a</sup>   | Region | SNP <sup>b</sup> | Chr | Position <sup>c</sup> | LD <sup>d</sup> | Type <sup>e</sup> | cDNA      | Protein     | ClinVar <sup>f</sup> | Polyphen <sup>g</sup> | Sift <sup>h</sup> | p-value         | References |
|----------------------------|--------|------------------|-----|-----------------------|-----------------|-------------------|-----------|-------------|----------------------|-----------------------|-------------------|-----------------|------------|
| <i>NRIP1 - USP25</i>       |        | rs62219001       | 21  | 15,210,560            |                 | intergenic        |           |             |                      |                       |                   | 1E-12           | [22]       |
| <i>NRIP1 - USP25</i>       |        | rs12106385       | 21  | 15,214,362            |                 | intergenic        |           |             |                      |                       |                   | 5E-8            | [20]       |
| <i>SCAF4</i>               |        | rs67038483       | 21  | 31,723,790            |                 | intronic          |           |             |                      |                       |                   | 7E-6            | [21]       |
| <i>SCAF4</i>               |        | rs73201545       | 21  | 31,733,452            |                 | intergenic        |           |             |                      |                       |                   | 8E-13           | [22]       |
| <i>DOP1B</i>               |        | rs11911615       | 21  | 36,180,834            |                 | intronic          |           |             |                      |                       |                   | 5E-10           | [22]       |
| <i>HMG1, BRWD1-AS1</i>     |        | rs4818025        | 21  | 39,337,245            |                 | intergenic        |           |             |                      |                       |                   | 9E-11           | [21]       |
| <i>BRWD1-AS1, HMG1</i>     |        | rs1963676        | 21  | 39,338,034            |                 | intergenic        |           |             |                      |                       |                   | 1E-13;<br>2E-22 | [20][22]   |
| <i>PKNOX1</i>              |        | rs2839619        | 21  | 43,016,067            |                 | intronic          |           |             |                      |                       |                   | 8E-6            | [7]        |
| <i>COMT</i>                |        | rs165722         | 22  | 19,961,490            |                 | intronic          |           |             |                      |                       |                   | 3E-9            | [22]       |
| <i>UBE2L3</i>              |        | rs5754102        | 22  | 21,561,983            |                 | intronic          |           |             |                      |                       |                   | 2E-8            | [22]       |
| <i>MTMR3</i>               |        | rs5763662        | 22  | 29,982,714            |                 | intronic          |           |             |                      |                       |                   | 1E-8            | [12]       |
| <i>LIF-AS1, HORMAD2</i>    |        | rs16988410       | 22  | 30,221,596            |                 | intergenic        |           |             |                      |                       |                   | 7E-9            | [22]       |
| <i>HMGXB4</i>              |        | rs35288294       | 22  | 35,280,146            |                 | intronic          |           |             |                      |                       |                   | 7E-10           | [22]       |
| <i>TOM1</i>                |        | rs138730         | 22  | 35,300,938            |                 | intronic          |           |             |                      |                       |                   | 6E-9            | [20]       |
| <i>SLC25A17</i>            |        | rs2076674        | 22  | 40,774,059            |                 | intronic          |           |             |                      |                       |                   | 3E-12           | [16]       |
| <i>XPNPEP3</i>             |        | rs138352         | 22  | 40,872,921            |                 | intronic          |           |             |                      |                       |                   | 8E-16           | [22]       |
| <i>XPNPEP3</i>             |        | rs5758128        | 22  | 40,918,008            |                 | intronic          |           |             |                      |                       |                   | 6E-13           | [20]       |
| <i>Y_RNA, RBX1</i>         |        | rs960596         | 22  | 40,997,516            |                 | intergenic        |           |             |                      |                       |                   | 1E-9            | [21]       |
| <i>PNPLA3</i>              |        | rs2294915        | 22  | 43,945,024            |                 | intronic          |           |             |                      |                       |                   | 6E-10           | [22]       |
| <i>FBLN1</i>               |        | rs13268          | 22  | 45,600,418            |                 | missense          | c.2084A>G | His695Arg   | benign               | possibly<br>damaging  | tolerated         | 4E-10;<br>9E-14 | [20][22]   |
|                            |        |                  | 22  | 46,231,706            |                 | intronic          |           |             |                      |                       |                   | 3E-8            | [12]       |
| <i>C22orf34, RN7SKP252</i> |        | rs1807675        | 22  | 49,674,346            |                 | intergenic        |           |             |                      |                       |                   | 7E-10           | [22]       |
| <i>PPP6R2</i>              |        | rs9616822        | 22  | 50,402,144            |                 | intronic          |           |             |                      |                       |                   | 4E-15           | [22]       |
| <i>PPP6R2</i>              |        | rs12162782       | 22  | 50,415,197            |                 | intronic          |           |             |                      |                       |                   | 9E-10;<br>4E-9  | [20][21]   |
| <i>ARSL (ARSE)</i>         |        | rs35143646       | X   | 2,938,114             |                 | missense          | c.1270G>A | p.Gly424Ser | benign               | possibly<br>damaging  | tolerated         | 2E-25           | [22]       |
| <i>EIF1AX</i>              |        | rs73447108       | X   | 20,136,228            |                 | intronic          |           |             |                      |                       |                   | 8E-18           | [22]       |
| <i>AR</i>                  |        | rs5031002        | X   | 67,722,783            |                 | intronic          |           |             |                      |                       |                   | 2E-7            | [6]        |

| Mapped gene <sup>a</sup> | Region | SNPid <sup>b</sup> | Chr | Position <sup>c</sup> | LD <sup>d</sup> | Type <sup>e</sup> | cDNA | Protein | ClinVar <sup>f</sup> | Polyphen <sup>g</sup> | Sift <sup>h</sup> | p-value | References |
|--------------------------|--------|--------------------|-----|-----------------------|-----------------|-------------------|------|---------|----------------------|-----------------------|-------------------|---------|------------|
| <i>TDGF1P3</i>           |        | rs5942956          | X   | 110,520,525           |                 | 5'-UTR            |      |         |                      |                       |                   | 2E-102  | [22]       |
| <i>M6PRP1, CHRDL1</i>    |        | rs144832584        | X   | 110,662,875           |                 | intergenic        |      |         |                      |                       |                   | 2E-8    | [22]       |
| <i>GDI1, FAM50A</i>      |        | rs188437955        | X   | 154,443,984           |                 | intergenic        |      |         |                      |                       |                   | 1E-8    | [22]       |

<sup>a</sup>Gene affected by the variant, or the closest genes in case of intergenic variants. <sup>b</sup>Identification in the dbSNPs database ([www.ncbi.nlm.nih.gov/snp](http://www.ncbi.nlm.nih.gov/snp)). <sup>c</sup>Positions are relative to genome assembly GRCh38. <sup>d</sup>Linkage disequilibrium (LD) tracks were taken from Berisa and Prickrel (2016) [23]. <sup>e</sup>Type of mutation. <sup>f</sup>Classification in the ClinVar database ([www.ncbi.nlm.nih.gov/clinvar](http://www.ncbi.nlm.nih.gov/clinvar)) of variants affecting coding regions: no interp., no interpretation; np, not present. <sup>g</sup>Prediction of the functional effect using PolyPhen ([genetics.bwh.harvard.edu/pph2/](http://genetics.bwh.harvard.edu/pph2/)). <sup>h</sup>Prediction of the functional effect using Sift ([sift.bii.a-star.edu.sg/](http://sift.bii.a-star.edu.sg/)).

# Supplementary references for European populations

1. Willer, C.J.; Sanna, S.; Jackson, A.U.; Scuteri, A.; Bonnycastle, L.L.; Clarke, R.; Heath, S.C.; Timpson, N.J.; Najjar, S.S.; Stringham, H.M., et al. Newly identified loci that influence lipid concentrations and risk of coronary artery disease. *Nat Genet* **2008**, *40*, 161-169, doi:10.1038/ng.76.
2. Kathiresan, S.; Melander, O.; Guiducci, C.; Surti, A.; Burt, N.P.; Rieder, M.J.; Cooper, G.M.; Roos, C.; Voight, B.F.; Havulinna, A.S., et al. Six new loci associated with blood low-density lipoprotein cholesterol, high-density lipoprotein cholesterol or triglycerides in humans. *Nat Genet* **2008**, *40*, 189-197, doi:10.1038/ng.75.
3. Sandhu, M.S.; Waterworth, D.M.; Debenham, S.L.; Wheeler, E.; Papadakis, K.; Zhao, J.H.; Song, K.; Yuan, X.; Johnson, T.; Ashford, S., et al. LDL-cholesterol concentrations: a genome-wide association study. *Lancet* **2008**, *371*, 483-491, doi:10.1016/S0140-6736(08)60208-1.
4. Kathiresan, S.; Willer, C.J.; Peloso, G.M.; Demissie, S.; Musunuru, K.; Schadt, E.E.; Kaplan, L.; Bennett, D.; Li, Y.; Tanaka, T., et al. Common variants at 30 loci contribute to polygenic dyslipidemia. *Nat Genet* **2009**, *41*, 56-65, doi:10.1038/ng.291.
5. Aulchenko, Y.S.; Ripatti, S.; Lindqvist, I.; Boomsma, D.; Heid, I.M.; Pramstaller, P.P.; Penninx, B.W.J.H.; Janssens, A.C.J.W.; Wilson, J.F.; Spector, T., et al. Loci influencing lipid levels and coronary heart disease risk in 16 European population cohorts. *Nature Genetics* **2008**, *41*, 47, doi:10.1038/ng.269.
6. Sabatti, C.; Service, S.K.; Hartikainen, A.L.; Pouta, A.; Ripatti, S.; Brodsky, J.; Jones, C.G.; Zaitlen, N.A.; Varilo, T.; Kaakinen, M., et al. Genome-wide association analysis of metabolic traits in a birth cohort from a founder population. *Nat Genet* **2009**, *41*, 35-46, doi:10.1038/ng.271.
7. Zemunik, T.; Boban, M.; Lauc, G.; Janković, S.; Rotim, K.; Vataavuk, Z.; Bencić, G.; Dogas, Z.; Boraska, V.; Torlak, V., et al. Genome-wide association study of biochemical traits in Korcula Island, Croatia. *Croat Med J* **2009**, *50*, 23-33, doi:10.3325/cmj.2009.50.23.
8. Teslovich, T.M.; Musunuru, K.; Smith, A.V.; Edmondson, A.C.; Stylianou, I.M.; Koseki, M.; Pirruccello, J.P.; Ripatti, S.; Chasman, D.I.; Willer, C.J., et al. Biological, clinical and population relevance of 95 loci for blood lipids. *Nature* **2010**, *466*, 707-713, doi:10.1038/nature09270.
9. Waterworth, D.M.; Ricketts, S.L.; Song, K.; Chen, L.; Zhao, J.H.; Ripatti, S.; Aulchenko, Y.S.; Zhang, W.; Yuan, X.; Lim, N., et al. Genetic variants influencing circulating lipid levels and risk of coronary artery disease. *Arterioscler Thromb Vasc Biol* **2010**, *30*, 2264-2276, doi:10.1161/ATVBAHA.109.201020.
10. Shen, H.; Damcott, C.M.; Rampersaud, E.; Pollin, T.I.; Horenstein, R.B.; McArdle, P.F.; Peyser, P.A.; Bielak, L.F.; Post, W.S.; Chang, Y.P., et al. Familial defective apolipoprotein B-100 and increased low-density lipoprotein cholesterol and coronary artery calcification in the old order amish. *Arch Intern Med* **2010**, *170*, 1850-1855, doi:10.1001/archinternmed.2010.384.
11. Keller, M.; Schleinitz, D.; Förster, J.; Tönjes, A.; Böttcher, Y.; Fischer-Rosinsky, A.; Breitfeld, J.; Weidle, K.; Rayner, N.W.; Burkhardt, R., et al. THOC5: a novel gene involved in HDL-cholesterol metabolism. *J Lipid Res* **2013**, *54*, 3170-3176, doi:10.1194/jlr.M039420.
12. Willer, C.J.; Schmidt, E.M.; Sengupta, S.; Peloso, G.M.; Gustafsson, S.; Kanoni, S.; Ganna, A.; Chen, J.; Buchkovich, M.L.; Mora, S., et al. Discovery and refinement of loci associated with lipid levels. *Nat Genet* **2013**, *45*, 1274-1283, doi:10.1038/ng.2797.
13. Surakka, I.; Horikoshi, M.; Mägi, R.; Sarin, A.P.; Mahajan, A.; Lagou, V.; Marullo, L.; Ferreira, T.; Miraglio, B.; Timonen, S., et al. The impact of low-frequency and rare variants on lipid levels. *Nat Genet* **2015**, *47*, 589-597, doi:10.1038/ng.3300.
14. Southam, L.; Gilly, A.; Süveges, D.; Farmaki, A.E.; Schwartzentruber, J.; Tachmazidou, I.; Matchan, A.; Rayner, N.W.; Tsafantakis, E.; Karaleftheri, M., et al. Whole genome sequencing and imputation in isolated populations identify genetic associations with medically-relevant complex traits. *Nat Commun* **2017**, *8*, 15606, doi:10.1038/ncomms15606.
15. Davis, J.P.; Huyghe, J.R.; Locke, A.E.; Jackson, A.U.; Sim, X.; Stringham, H.M.; Teslovich, T.M.; Welch, R.P.; Fuchsberger, C.; Narisu, N., et al. Common, low-frequency, and rare genetic



- variants associated with lipoprotein subclasses and triglyceride measures in Finnish men from the METSIM study. *PLoS Genet* **2017**, *13*, e1007079, doi:10.1371/journal.pgen.1007079.
16. Liu, D.J.; Peloso, G.M.; Yu, H.; Butterworth, A.S.; Wang, X.; Mahajan, A.; Saleheen, D.; Emdin, C.; Alam, D.; Alves, A.C., et al. Exome-wide association study of plasma lipids in >300,000 individuals. *Nat Genet* **2017**, *49*, 1758-1766, doi:10.1038/ng.3977.
  17. Lutz, M.W.; Casanova, R.; Saldana, S.; Kuchibhatla, M.; Plassman, B.L.; Hayden, K.M. Analysis of pleiotropic genetic effects on cognitive impairment, systemic inflammation, and plasma lipids in the Health and Retirement Study. *Neurobiol Aging* **2019**, *80*, 173-186, doi:10.1016/j.neurobiolaging.2018.10.028.
  18. Tabassum, R.; Rämö, J.T.; Ripatti, P.; Koskela, J.T.; Kurki, M.; Karjalainen, J.; Palta, P.; Hassan, S.; Nunez-Fontarnau, J.; Kiiskinen, T.T.J., et al. Genetic architecture of human plasma lipidome and its link to cardiovascular disease. *Nat Commun* **2019**, *10*, 4329, doi:10.1038/s41467-019-11954-8.
  19. Kulminski, A.M.; Loika, Y.; Nazarian, A.; Culminkaya, I. Quantitative and Qualitative Role of Antagonistic Heterogeneity in Genetics of Blood Lipids. *J Gerontol A Biol Sci Med Sci* **2020**, *75*, 1811-1819, doi:10.1093/gerona/glz225.
  20. Ripatti, P.; Rämö, J.T.; Mars, N.J.; Fu, Y.; Lin, J.; Söderlund, S.; Benner, C.; Surakka, I.; Kiiskinen, T.; Havulinna, A.S., et al. Polygenic Hyperlipidemias and Coronary Artery Disease Risk. *Circ Genom Precis Med* **2020**, *13*, e002725, doi:10.1161/CIRCGEN.119.002725.
  21. Richardson, T.G.; Sanderson, E.; Palmer, T.M.; Ala-Korpela, M.; Ference, B.A.; Davey Smith, G.; Holmes, M.V. Evaluating the relationship between circulating lipoprotein lipids and apolipoproteins with risk of coronary heart disease: A multivariable Mendelian randomisation analysis. *PLoS Med* **2020**, *17*, e1003062, doi:10.1371/journal.pmed.1003062.
  22. Klimentidis, Y.C.; Arora, A.; Newell, M.; Zhou, J.; Ordovas, J.M.; Renquist, B.J.; Wood, A.C. Phenotypic and Genetic Characterization of Lower LDL Cholesterol and Increased Type 2 Diabetes Risk in the UK Biobank. *Diabetes* **2020**, *69*, 2194-2205, doi:10.2337/db19-1134.
  23. Berisa, T.; Pickrell, J.K. Approximately independent linkage disequilibrium blocks in human populations. **2016**, doi:10.1093/bioinformatics/btv546.

**Table S1b:** SNVs associated with low-density lipoprotein cholesterol in East-Asian populations.

| Mapped gene <sup>a</sup>       | Region                           | SNPid <sup>b</sup> | Chr | Position <sup>c</sup> | Type <sup>d</sup> | cDNA       | Protein     | ClinVar <sup>e</sup> | Polyphen <sup>f</sup> | Sift <sup>g</sup> | p-value                                       | References |
|--------------------------------|----------------------------------|--------------------|-----|-----------------------|-------------------|------------|-------------|----------------------|-----------------------|-------------------|-----------------------------------------------|------------|
|                                |                                  |                    | 1   | 25,422,778            | intronic          |            |             |                      |                       |                   | 1E-8                                          | [9]        |
|                                |                                  |                    | 1   | 25,434,429            | intronic          |            |             |                      |                       |                   | 2E-18                                         | [5]        |
| <i>PIGV</i> , <i>RN7SL165P</i> |                                  | rs12748152         | 1   | 26,811,902            | intergenic        |            |             |                      |                       |                   | 3E-12                                         | [5]        |
| <i>BSND</i> - <i>PCSK9</i>     | <i>PCSK9</i>                     | rs7523141          | 1   | 55,033,125            | intergenic        |            |             |                      |                       |                   | 3E-25                                         | [7]        |
| <i>BSND</i> - <i>PCSK9</i>     |                                  | rs7525649          | 1   | 55,033,483            | intergenic        |            |             |                      |                       |                   | 3E-11                                         | [2]        |
| <i>PCSK9</i> , <i>BSND</i>     |                                  | rs2479409          | 1   | 55,038,977            | 5'-UTR            | c.-861G>A  |             | benign               |                       |                   | 3E-42                                         | [5]        |
| <i>PCSK9</i>                   |                                  | rs151193009        | 1   | 55,043,912            | missense          | c.277C>T   | p.Arg93Cys  | conflicting          | probably<br>damaging  | deleterious       | 6E-17;<br>8E-32                               | [3][9]     |
| <i>PCSK9</i>                   |                                  | rs12136600         | 1   | 55,055,522            | intronic          |            |             |                      |                       |                   | 4E-20                                         | [7]        |
| <i>PCSK9</i>                   |                                  | rs505151           | 1   | 55,063,514            | missense          | c.2009G>A  | p.Gly670Glu |                      | benign                | tolerated         | 8E-7;<br>9E-9                                 | [5]        |
| <i>USP24</i> - <i>Y_RNA</i>    |                                  | chr1:55509585      | 1   | 55,509,585            | intergenic        |            |             |                      |                       |                   | 4E-36                                         | [10]       |
| <i>LINC01755</i>               |                                  | rs147943615        | 1   | 55,902,364            | intergenic        |            |             |                      |                       |                   | 1E-27                                         | [7]        |
| <i>USP1</i>                    | <i>DOCK7</i> -<br><i>ANGPTL3</i> | rs10158897         | 1   | 62,447,248            | intronic          |            |             |                      |                       |                   | 9E-6                                          | [1]        |
| <i>DOCK7</i> - <i>ANGPTL3</i>  |                                  | rs636523           | 1   | 62,454,337            | intergenic        |            |             |                      |                       |                   | 5E-7                                          | [1]        |
| <i>DOCK7</i>                   |                                  | rs11485618         | 1   | 62,628,536            | intronic          |            |             |                      |                       |                   | 1E-31                                         | [5]        |
| <i>ADGRL2</i>                  |                                  | rs367881           | 1   | 81,883,032            | intronic          |            |             |                      |                       |                   | 2E-6                                          | [8]        |
|                                |                                  |                    | 1   | 109,274,968           | 3'-UTR            | c.*919G>T  |             | association          |                       |                   | 3E-11                                         | [9]        |
|                                |                                  |                    | 1   | 109,275,216           | 3'-UTR            | c.*1167T>C |             | np                   |                       |                   | 2E-28                                         | [7]        |
|                                |                                  |                    | 1   | 109,275,684           | 3'-UTR            | c.*1635G>T |             | np                   |                       |                   | 2E-17                                         | [3]        |
|                                |                                  |                    | 1   | 109,279,544           | intergenic        |            |             |                      |                       |                   | 2E-11;<br>2E-19;<br>2E-31;<br>4E-289;<br>7E-9 | [5][9]     |
|                                |                                  |                    | 1   | 109,817,590           | intergenic        |            |             |                      |                       |                   | 2E-21                                         | [10]       |
| <i>PRPF3</i>                   |                                  | rs56047090         | 1   | 150,343,248           | intronic          |            |             |                      |                       |                   | 5E-7                                          | [8]        |
| <i>ANXA9</i>                   |                                  | rs267733           | 1   | 150,986,360           | missense          | c.497A>G   | p.Asp166Gly | np                   | probably<br>damaging  | tolerated         | 4E-8                                          | [5]        |

| Mapped gene <sup>a</sup>                                                               | Region         | SNPId <sup>b</sup>          | Chr | Position <sup>c</sup> | Type <sup>d</sup> | cDNA      | Protein     | ClinVar <sup>e</sup>    | Polyphen <sup>f</sup> | Sifts <sup>g</sup> | p-value          | References |
|----------------------------------------------------------------------------------------|----------------|-----------------------------|-----|-----------------------|-------------------|-----------|-------------|-------------------------|-----------------------|--------------------|------------------|------------|
| <i>MTARC1</i>                                                                          | <i>MTAC1</i>   | rs2642438                   | 1   | 220,796,686           | missense          | c.493A>G  | p.Thr165Ala | np                      | benign                | tolerated          | 1E-19            | [5]        |
| <i>LINC01132, LINC00184</i>                                                            | <i>IRF2BP2</i> | rs2587534                   | 1   | 234,713,592           | intergenic        |           |             |                         |                       |                    | 2E-23            | [5]        |
| <i>LINC00184 - LINC01132</i>                                                           |                | rs553427                    | 1   | 234,717,013           | intergenic        |           |             |                         |                       |                    | 1E-9             | [7]        |
| <i>HS1BP3</i>                                                                          | <i>APOB</i>    | rs75352129                  | 2   | 20,648,432            | intronic          |           |             |                         |                       |                    | 6E-59            | [7]        |
| <i>LDAH - APOB</i>                                                                     |                | rs10172650                  | 2   | 20,982,585            | intergenic        |           |             |                         |                       |                    | 1E-12;<br>4E-14  | [5]        |
| <i>APOB</i>                                                                            |                | rs57825321                  | 2   | 21,024,193            | intronic          |           |             |                         |                       |                    | 4E-30            | [7]        |
| <i>APOB</i>                                                                            |                | rs13306194                  | 2   | 21,029,662            | missense          | c.1594C>T | p.Arg532Trp | np                      | probably<br>damaging  | deleterious        | 1E-12            | [3]        |
| <i>APOB</i>                                                                            |                | rs1367117                   | 2   | 21,041,028            | missense          | c.293C>T  | p.Thr98Ile  | benign/likely<br>benign | benign                | deleterious        | 2E-10;<br>2E-179 | [5][7]     |
| <i>APOB - TDRD15</i>                                                                   |                | rs312949                    | 2   | 21,111,411            | intergenic        |           |             |                         |                       |                    | 3E-6             | [2]        |
| <i>TDRD15</i>                                                                          |                | chr2:21242731               | 2   | 21,242,731            | intergenic        |           |             |                         |                       |                    | 1E-18            | [10]       |
| <i>TRD15 - NUTF2P8</i>                                                                 |                | rs12469758                  | 2   | 21,310,235            | intergenic        |           |             |                         |                       |                    | 5E-53            | [7]        |
| <i>VN1R18P</i>                                                                         |                | rs77348447                  | 2   | 48,003,689            | intronic          |           |             |                         |                       |                    | 5E-6             | [8]        |
| <i>FSHR, CTBP2P5</i>                                                                   |                | rs10490120                  | 2   | 48,916,690            | intergenic        |           |             |                         |                       |                    | 1E-6             | [8]        |
| <i>EHBP1</i>                                                                           |                | rs2710642                   | 2   | 62,922,422            | intronic          |           |             |                         |                       |                    | 2E-10            | [5]        |
| <i>Y_RNA, LINC01101</i>                                                                |                | rs2030746                   | 2   | 120,551,912           | intergenic        |           |             |                         |                       |                    | 8E-9             | [5]        |
| <i>FN1</i>                                                                             |                | rs1250229                   | 2   | 215,439,661           | intergenic        |           |             |                         |                       |                    | 2E-9             | [5]        |
| <i>UGT1A8, UGT1A9, UGT1A4, UGT1A7,<br/>UGT1A10, UGT1A6, UGT1A5, UGT1A1,<br/>UGT1A3</i> |                | rs11563251                  | 2   | 233,770,738           | intronic          |           |             |                         |                       |                    | 4E-8             | [5]        |
| <i>CMTM6</i>                                                                           |                | rs3773777                   | 3   | 32,496,755            | intronic          |           |             |                         |                       |                    | 7E-8             | [5]        |
| <i>WDR5B-DT, KPNA1</i>                                                                 |                | rs3762637                   | 3   | 122,426,477           | intronic          |           |             |                         |                       |                    | 3E-8             | [5]        |
| <i>DNAJC13</i>                                                                         |                | rs17345563                  | 3   | 132,490,359           | intronic          |           |             |                         |                       |                    | 1E-9             | [5]        |
| <i>TNK2</i>                                                                            |                | rs75454932<br>(rs141507877) | 3   | 195,894,179           | intronic          |           |             |                         |                       |                    | 3E-6             | [8]        |
| <i>RGS12</i>                                                                           | <i>LRPAP1</i>  | rs6818397                   | 4   | 3,433,158             | intronic          |           |             |                         |                       |                    | 3E-9             | [5]        |
| <i>HEXB</i>                                                                            | <i>HMGCR</i>   | rs186072633                 | 5   | 74,648,603            | intronic          |           |             |                         |                       |                    | 6E-15            | [10]       |
| <i>HMGCR, ANKRD31</i>                                                                  |                | rs6871667                   | 5   | 75,308,917            | intergenic        |           |             |                         |                       |                    | 7E-13            | [2]        |
| <i>HMGCR</i>                                                                           |                | rs10045497                  | 5   | 75,340,659            | intronic          |           |             |                         |                       |                    | 1E-12            | [1]        |
| <i>HMGCR</i>                                                                           |                | rs3846661                   | 5   | 75,343,353            | intronic          |           |             |                         |                       |                    | 5E-31            | [7]        |

| Mapped gene <sup>a</sup>     | Region        | SNPid <sup>b</sup> | Chr | Position <sup>c</sup> | Type <sup>d</sup> | cDNA           | Protein   | ClinVar <sup>e</sup> | Polyphen <sup>f</sup> | Sift <sup>g</sup> | p-value         | References |
|------------------------------|---------------|--------------------|-----|-----------------------|-------------------|----------------|-----------|----------------------|-----------------------|-------------------|-----------------|------------|
|                              |               |                    | 5   | 75,352,778            | intronic          | c.1368+1176A>T |           | association          |                       |                   | 1E-6;<br>1E-9   | [9]        |
|                              |               |                    | 5   | 75,360,714            | 3'-UTR            | c.*372T>C      |           | np                   |                       |                   | 1E-21;<br>3E-95 | [5]        |
|                              |               |                    | 5   | 75,513,055            | intronic          |                |           |                      |                       |                   | 1E-16           | [5]        |
| <i>CSNK1G3</i>               |               | rs4530754          | 5   | 123,519,722           | intronic          |                |           |                      |                       |                   | 3E-12           | [5]        |
| <i>HAVCR1, TIMD4</i>         |               | rs6882076          | 5   | 156,963,286           | intergenic        |                |           |                      |                       |                   | 1E-33;<br>1E-8  | [5][7]     |
|                              |               |                    | 6   | 16,108,932            | intergenic        |                |           |                      |                       |                   | 8E-17           | [5]        |
| <i>HLA-C, USP8P1</i>         |               | rs9357121          | 6   | 31,272,702            | intergenic        |                |           |                      |                       |                   | 3E-10           | [2]        |
| <i>HLA-DRA</i>               |               | rs3177928          | 6   | 32,444,658            | 3'-UTR            | c.*18G>A       |           | np                   |                       |                   | 5E-17           | [5]        |
| <i>TRAM2-AS1</i>             |               | rs2239620          | 6   | 52,587,787            | intergenic        |                |           |                      |                       |                   | 2E-8            | [5]        |
| <i>FRK</i>                   |               | rs6909746          | 6   | 116,031,587           | intronic          |                |           |                      |                       |                   | 2E-9            | [5]        |
| <i>HBS1L</i>                 |               | rs7775698          | 6   | 135,097,497           | intronic          |                |           |                      |                       |                   | 2E-8            | [5]        |
| <i>HBS1L</i>                 |               | rs7776054          | 6   | 135,097,778           | intronic          |                |           |                      |                       |                   | 4E-8            | [5]        |
| <i>H3P28</i>                 |               | rs4870470          | 6   | 156,593,851           | intergenic        |                |           |                      |                       |                   | 2E-6            | [8]        |
| <i>DNAH11</i>                |               | rs12670798         | 7   | 21,567,734            | intronic          |                |           |                      |                       |                   | 2E-12           | [5]        |
| <i>MIR148A</i>               |               | rs28537499         | 7   | 25,975,772            | intergenic        |                |           |                      |                       |                   | 2E-10           | [7]        |
|                              |               |                    | 7   | 44,539,581            | synonymous        | c.816C>G       | p.Leu272= | benign               |                       | tolerated         | 2E-14           | [5]        |
| <i>TBL2</i>                  |               | rs17145738         | 7   | 73,568,544            | 3'-UTR            | c.*1963G>A     |           |                      |                       |                   | 5E-9            | [7]        |
| <i>RN7SL265P, ABHD11-AS1</i> |               | rs112959129        | 7   | 73,733,662            | intergenic        |                |           |                      |                       |                   | 1E-6            | [8]        |
|                              |               |                    | 8   | 9,325,848             | intergenic        |                |           |                      |                       |                   | 1E-22           | [5]        |
| <i>TRMT112P7, RP1</i>        |               | rs10102164         | 8   | 54,509,054            | intergenic        |                |           |                      |                       |                   | 8E-11           | [5]        |
| <i>UBXN2B</i>                | <i>CYP7A1</i> | rs13277801         | 8   | 58,440,975            | intronic          |                |           |                      |                       |                   | 4E-19           | [5]        |
| <i>CYP7A1, UBXN2B</i>        |               | rs75214121         | 8   | 58,485,717            | intergenic        |                |           |                      |                       |                   | 9E-9            | [7]        |
| <i>TRIB1</i>                 | <i>TRIB1</i>  | rs2001846          | 8   | 125,466,208           | intergenic        |                |           |                      |                       |                   | 6E-9            | [7]        |
| <i>TRIB1</i>                 |               | rs17321515         | 8   | 125,474,167           | intergenic        |                |           |                      |                       |                   | 8E-7            | [1]        |
| <i>TRIB1</i>                 |               | rs2980869          | 8   | 125,476,008           | intergenic        |                |           |                      |                       |                   | 3E-6;<br>4E-9   | [5]        |
| <i>TRIB1</i>                 |               | rs2954029          | 8   | 125,478,730           | intergenic        |                |           |                      |                       |                   | 2E-56           | [5]        |

| Mapped gene <sup>a</sup> | Region                | SNPId <sup>b</sup>          | Chr | Position <sup>c</sup> | Type <sup>d</sup> | cDNA         | Protein     | ClinVar <sup>e</sup> | Polyphen <sup>f</sup> | Sift <sup>g</sup> | p-value                            | References |
|--------------------------|-----------------------|-----------------------------|-----|-----------------------|-------------------|--------------|-------------|----------------------|-----------------------|-------------------|------------------------------------|------------|
| <i>COL22A1 - KCNK9</i>   |                       | rs4588831                   | 8   | 139,337,989           | intergenic        |              |             |                      |                       |                   | 5E-6                               | [8]        |
| <i>PLEC</i>              |                       | rs7832643                   | 8   | 143,948,489           | intronic          |              |             |                      |                       |                   | 2E-17                              | [5]        |
|                          |                       |                             | 9   | 2,640,759             | intronic          |              |             |                      |                       |                   | 5E-10                              | [5]        |
| <i>ZNF618</i>            |                       | rs59508358<br>(rs377752731) | 9   | 113,833,966           | intergenic        |              |             |                      |                       |                   | 9E-6                               | [8]        |
| <i>ABO</i>               |                       | rs9411378                   | 9   | 133,270,015           | intronic          |              |             |                      |                       |                   | 1E-19                              | [7]        |
| <i>ABO</i>               |                       | rs507666                    | 9   | 133,273,983           | intronic          | c.28+1179T>C |             | association          |                       |                   | 2E-11                              | [1]        |
| <i>ABO, Y_RNA</i>        |                       | rs579459                    | 9   | 133,278,724           | intergenic        |              |             |                      |                       |                   | 2E-51;<br>2E-9;<br>6E-13;<br>7E-13 | [2][5]     |
| <i>TMEM250 - LHX3</i>    |                       | chr9:136131651              | 9   | 136,131,651           | intergenic        |              |             |                      |                       |                   | 5E-11                              | [10]       |
| <i>OIT3</i>              |                       | rs41280378                  | 10  | 72,932,888            | 3'-UTR            | c.*364T>G    |             | np                   |                       |                   | 9E-15                              | [7]        |
| <i>GPAM</i>              |                       | rs1129555                   | 10  | 112,150,963           | 3'-UTR            | c.*2587T>C   |             | np                   |                       |                   | 1E-15                              | [5]        |
| <i>MYRF, TMEM258</i>     | <i>FADS1</i>          | rs174533                    | 11  | 61,781,553            | intronic          |              |             |                      |                       |                   | 1E-9;<br>5E-7                      | [5]        |
| <i>FADS2</i>             |                       | rs1535                      | 11  | 61,830,500            | intronic          |              |             |                      |                       |                   | 5E-45                              | [5]        |
| <i>ZPR1</i>              | <i>APOA1-C3-A4-A5</i> | rs964184                    | 11  | 116,778,201           | 3'-UTR            | c.*724C>G    |             | np                   |                       |                   | 3E-18                              | [5]        |
| <i>ZPR1</i>              |                       | rs113932726                 | 11  | 116,779,922           | intronic          |              |             |                      |                       |                   | 2E-8                               | [7]        |
| <i>GSEC, DCPS</i>        | <i>ST3GAL4</i>        | rs2401                      | 11  | 126,341,832           | intronic          |              |             |                      |                       |                   | 5E-8                               | [5]        |
| <i>GSEC, DCPS</i>        |                       | rs17135399                  | 11  | 126,348,646           | intronic          |              |             |                      |                       |                   | 2E-22                              | [5]        |
| <i>NR1H4</i>             |                       | rs75061399                  | 12  | 100,548,299           | intronic          |              |             |                      |                       |                   | 5E-8                               | [7]        |
| <i>CUX2</i>              |                       | rs79105258                  | 12  | 111,280,427           | intronic          |              |             |                      |                       |                   | 3E-20                              | [7]        |
| <i>RPH3A</i>             |                       | rs7315593                   | 12  | 112,840,165           | intronic          |              |             |                      |                       |                   | 8E-9                               | [7]        |
|                          |                       |                             | 12  | 120,978,847           | missense          | c.79A>C      | p.Ile27Leu  | benign               | benign                | tolerated         | 2E-22                              | [5]        |
| <i>BRCA2</i>             |                       | rs1799955                   | 13  | 32,355,095            | synonymous        | c.7242A>G    | p.Ser2414=  | benign               |                       | tolerated         | 3E-8;<br>3E-9                      | [5]        |
| <i>BRCA2</i>             |                       | rs4942486                   | 13  | 32,379,251            | intronic          | c.8755-66T>C |             | benign               |                       |                   | 5E-14                              | [5]        |
|                          |                       |                             | 14  | 24,414,681            | missense          | c.2932G>A    | p.Ala978Thr | np                   | benign                | tolerated         | 2E-14                              | [5]        |
| <i>OTX2-AS1</i>          |                       | rs57618243                  | 14  | 56,984,146            | intergenic        |              |             |                      |                       |                   | 7E-6                               | [8]        |
|                          |                       |                             | 15  | 58,400,482            | intronic          |              |             |                      |                       |                   | 2E-8                               | [7]        |

| Mapped gene <sup>a</sup> | Region                    | SNPid <sup>b</sup> | Chr | Position <sup>c</sup> | Type <sup>d</sup> | cDNA       | Protein     | ClinVar <sup>e</sup>    | Polyphen <sup>f</sup> | Sifts <sup>g</sup> | p-value          | References |
|--------------------------|---------------------------|--------------------|-----|-----------------------|-------------------|------------|-------------|-------------------------|-----------------------|--------------------|------------------|------------|
| <i>CASC22, LINC02180</i> |                           | rs12925859         | 16  | 52,194,027            | intergenic        |            |             |                         |                       |                    | 4E-6             | [8]        |
| <i>HERPUD1, CETP</i>     | <i>CETP</i>               | rs247616           | 16  | 56,955,678            | intergenic        |            |             |                         |                       |                    | 1E-33            | [5]        |
| <i>PKD1L3</i>            |                           | rs7185272          | 16  | 71,979,898            | missense          | c.1286C>G  | p.Thr429Ser | np                      | benign                | tolerated          | 5E-8             | [3]        |
| <i>PKD1L3</i>            |                           | rs7192750          | 16  | 71,980,883            | intronic          |            |             |                         |                       |                    | 1E-14            | [5]        |
| <i>PKD1L3</i>            |                           | rs8051431          | 16  | 71,981,352            | intronic          |            |             |                         |                       |                    | 4E-15            | [5]        |
| <i>PKD1L3</i>            |                           | rs12927205         | 16  | 71,991,178            | intronic          |            |             |                         |                       |                    | 8E-7             | [2]        |
| <i>TXNL4B</i>            |                           | rs77303550         | 16  | 72,045,758            | intronic          |            |             |                         |                       |                    | 1E-8;<br>7E-16   | [7][9]     |
| <i>HPR, TXNL4B</i>       |                           | rs2000999          | 16  | 72,074,194            | intronic          |            |             |                         |                       |                    | 2E-6;<br>5E-45   | [5]        |
| <i>DLG4</i>              |                           | rs314253           | 17  | 7,188,331             | 3'-UTR            | c.*2377A>G |             | np                      |                       |                    | 4E-10            | [5]        |
| <i>PFAS</i>              |                           | rs4791641          | 17  | 8,257,831             | missense          | c.1100C>T  | p.Pro367Leu | np                      | benign                | tolerated          | 1E-7             | [5]        |
| <i>TNFAIP1</i>           |                           | rs3093679          | 17  | 28,337,189            | intronic          |            |             |                         |                       |                    | 2E-9             | [7]        |
|                          |                           |                    | 19  | 11,106,639            | missense          | c.769C>T   | p.Arg257Trp | np                      | probably<br>damaging  | deleterious        | 3E-8             | [3]        |
|                          |                           |                    | 19  | 11,118,542            | intronic          |            |             |                         |                       |                    | 5E-9             | [5]        |
|                          |                           |                    | 19  | 11,131,631            | 3'-UTR            | c.*315G>C  |             | benign/likely<br>benign |                       |                    | 3E-15;<br>4E-40  | [5][7]     |
|                          |                           |                    | 19  | 11,139,463            | intronic          |            |             |                         |                       |                    | 1E-24            | [2]        |
|                          |                           |                    | 19  | 11,143,211            | intronic          |            |             |                         |                       |                    | 3E-9             | [9]        |
|                          |                           |                    | 19  | 11,145,500            | 3'-UTR            | c.*1683G>A |             | np                      |                       |                    | 7E-6             | [1]        |
| <i>ANGPTL8</i>           |                           | rs2278426          | 19  | 11,239,812            | missense          | c.175C>T   | p.Arg59Trp  | np                      | possibly<br>damaging  | deleterious        | 2E-9             | [7]        |
| <i>SUGP1</i>             | <i>NCAN -<br/>TM6SF2</i>  | rs10401969         | 19  | 19,296,909            | intronic          |            |             |                         |                       |                    | 6E-51            | [5]        |
| <i>NECTIN2</i>           | <i>APOE-C1-C2-<br/>C4</i> | rs406456           | 19  | 44,879,460            | intronic          |            |             |                         |                       |                    | 5E-6             | [8]        |
| <i>TOMM40</i>            |                           | rs1160985          | 19  | 44,900,155            | intronic          |            |             |                         |                       |                    | 3E-6;<br>4E-13   | [1][4]     |
| <i>TOMM40 - APOE</i>     |                           | rs769446           | 19  | 44,905,371            | intergenic        |            |             |                         |                       |                    | 3E-322           | [7]        |
| <i>APOE</i>              |                           | rs429358           | 19  | 44,908,684            | missense          | c.388T>C   | p.Cys130Arg | conflicting             | benign                | tolerated          | 4E-71            | [7]        |
| <i>APOE</i>              |                           | rs7412             | 19  | 44,908,822            | missense          | c.526C>T   | p.Arg176Cys | drug<br>response        | probably<br>damaging  | deleterious        | 2E-286;<br>7E-15 | [5][6]     |
| <i>APOE - APOC1</i>      |                           | rs1065853          | 19  | 44,909,976            | intergenic        |            |             |                         |                       |                    | 3E-54            | [9]        |

| Mapped gene <sup>a</sup> | Region | SNPId <sup>b</sup> | Chr | Position <sup>c</sup> | Type <sup>d</sup> | cDNA | Protein | ClinVar <sup>e</sup> | Polyphen <sup>f</sup> | Sift <sup>g</sup> | p-value                    | References |
|--------------------------|--------|--------------------|-----|-----------------------|-------------------|------|---------|----------------------|-----------------------|-------------------|----------------------------|------------|
|                          |        |                    | 19  | 44,912,383            | intergenic        |      |         |                      |                       |                   | 1E-129;<br>1E-13;<br>4E-59 | [5][6]     |
|                          |        |                    | 19  | 45,412,079            | intronic          |      |         |                      |                       |                   | 9E-113                     | [10]       |
| <i>LINC01723</i>         |        | rs364585           | 20  | 12,982,070            | intergenic        |      |         |                      |                       |                   | 4E-11                      | [5]        |
| <i>RNU6-192P</i>         |        | rs2328223          | 20  | 17,865,277            | intergenic        |      |         |                      |                       |                   | 2E-10                      | [5]        |
| <i>TOP1</i>              |        | rs6065311          | 20  | 41,095,698            | intronic          |      |         |                      |                       |                   | 2E-34;<br>3E-6             | [5]        |
| <i>ZHX3</i>              |        | rs56668103         | 20  | 41,197,439            | intronic          |      |         |                      |                       |                   | 7E-9                       | [7]        |
| <i>MTMR3</i>             |        | rs5763662          | 22  | 29,982,714            | intronic          |      |         |                      |                       |                   | 3E-9                       | [5]        |

<sup>a</sup>Gene affected by the variant, or the closest genes in case of intergenic variants. <sup>b</sup>Identification in the dbSNPs database ([www.ncbi.nlm.nih.gov/snp](http://www.ncbi.nlm.nih.gov/snp)). <sup>c</sup>Positions are relative to genome assembly GRCh38. <sup>d</sup>Type of mutation. <sup>e</sup>Classification in the ClinVar database ([www.ncbi.nlm.nih.gov/clinvar](http://www.ncbi.nlm.nih.gov/clinvar)) of variants affecting coding regions: no interp., no interpretation; np, not present. <sup>f</sup>Prediction of the functional effect using PolyPhen ([genetics.bwh.harvard.edu/pph2/](http://genetics.bwh.harvard.edu/pph2/)). <sup>g</sup>Prediction of the functional effect using Sift ([sift.bii.a-star.edu.sg/](http://sift.bii.a-star.edu.sg/)).

# Supplementary references for East-Asian populations

1. Zhou, L.; He, M.; Mo, Z.; Wu, C.; Yang, H.; Yu, D.; Yang, X.; Zhang, X.; Wang, Y.; Sun, J., et al. A genome wide association study identifies common variants associated with lipid levels in the Chinese population. *PLoS One* **2013**, *8*, e82420, doi:10.1371/journal.pone.0082420.
2. Lu, X.; Huang, J.; Mo, Z.; He, J.; Wang, L.; Yang, X.; Tan, A.; Chen, S.; Chen, J.; Gu, C.C., et al. Genetic Susceptibility to Lipid Levels and Lipid Change Over Time and Risk of Incident Hyperlipidemia in Chinese Populations. *Circ Cardiovasc Genet* **2016**, *9*, 37-44, doi:10.1161/CIRCGENETICS.115.001096.
3. Tang, C.S.; Zhang, H.; Cheung, C.Y.; Xu, M.; Ho, J.C.; Zhou, W.; Cherny, S.S.; Zhang, Y.; Holmen, O.; Au, K.W., et al. Exome-wide association analysis reveals novel coding sequence variants associated with lipid traits in Chinese. *Nat Commun* **2015**, *6*, 10206, doi:10.1038/ncomms10206.
4. Kurano, M.; Tsukamoto, K.; Kamitsuji, S.; Kamatani, N.; Hara, M.; Ishikawa, T.; Kim, B.J.; Moon, S.; Jin Kim, Y.; Teramoto, T. Genome-wide association study of serum lipids confirms previously reported associations as well as new associations of common SNPs within PCSK7 gene with triglyceride. *J Hum Genet* **2016**, *61*, 427-433, doi:10.1038/jhg.2015.170.
5. Spracklen, C.N.; Chen, P.; Kim, Y.J.; Wang, X.; Cai, H.; Li, S.; Long, J.; Wu, Y.; Wang, Y.X.; Takeuchi, F., et al. Association analyses of East Asian individuals and trans-ancestry analyses with European individuals reveal new loci associated with cholesterol and triglyceride levels. *Hum Mol Genet* **2017**, *26*, 1770-1784, doi:10.1093/hmg/ddx062.
6. Zhu, Y.; Zhang, D.; Zhou, D.; Li, Z.; Li, Z.; Fang, L.; Yang, M.; Shan, Z.; Li, H.; Chen, J., et al. Susceptibility loci for metabolic syndrome and metabolic components identified in Han Chinese: a multi-stage genome-wide association study. *J Cell Mol Med* **2017**, *21*, 1106-1116, doi:10.1111/jcmm.13042.
7. Kanai, M.; Akiyama, M.; Takahashi, A.; Matoba, N.; Momozawa, Y.; Ikeda, M.; Iwata, N.; Ikegawa, S.; Hirata, M.; Matsuda, K., et al. Genetic analysis of quantitative traits in the Japanese population links cell types to complex human diseases. *Nat Genet* **2018**, *50*, 390-400, doi:10.1038/s41588-018-0047-6.
8. Liu, H.; Wang, W.; Zhang, C.; Xu, C.; Duan, H.; Tian, X.; Zhang, D. Heritability and Genome-Wide Association Study of Plasma Cholesterol in Chinese Adult Twins. *Front Endocrinol (Lausanne)* **2018**, *9*, 677, doi:10.3389/fendo.2018.00677.
9. Moon, S.; Kim, Y.J.; Han, S.; Hwang, M.Y.; Shin, D.M.; Park, M.Y.; Lu, Y.; Yoon, K.; Jang, H.M.; Kim, Y.K., et al. The Korea Biobank Array: Design and Identification of Coding Variants Associated with Blood Biochemical Traits. *Sci Rep* **2019**, *9*, 1382, doi:10.1038/s41598-018-37832-9.
10. Han, S.; Hwang, M.Y.; Yoon, K.; Kim, Y.K.; Kim, Y.J.; Kim, B.J.; Moon, S. Exome chip-driven association study of lipidemia in >14,000 Koreans and evaluation of genetic effect on identified variants between different ethnic groups. *Genet Epidemiol* **2019**, *43*, 617-628, doi:10.1002/gepi.22208.



**Table S1c:** SNVs associated with low-density lipoprotein cholesterol in Afro-Americans or African ancestry populations.

| Mapped gene <sup>a</sup>       | Region                       | SNPid <sup>b</sup> | Chr | Position <sup>c</sup> | Type <sup>d</sup> | cDNA      | Protein     | ClinVar <sup>e</sup> | Polyphen <sup>f</sup> | Sift <sup>g</sup> | p-value         | References |
|--------------------------------|------------------------------|--------------------|-----|-----------------------|-------------------|-----------|-------------|----------------------|-----------------------|-------------------|-----------------|------------|
| <i>PCSK9</i>                   | <i>PCSK9</i>                 | rs28362286         | 1   | 55,063,542            | nonsense          | c.2037C>A | p.Cys679Ter | conflicting          |                       |                   | 2E-42           | [3]        |
| <i>CELSR2</i>                  | <i>CELSR2</i> - <i>SORT1</i> | rs12740374         | 1   | 109,274,968           | 3'-UTR            | c.*919G>T |             | association          |                       |                   | 2E-26;<br>9E-29 | [1][3]     |
| <i>TARBP1</i> - <i>IRF2BP2</i> | <i>IRF2BP2</i>               | rs744487           | 1   | 234,590,266           | intergenic        |           |             |                      |                       |                   | 5E-6            | [1]        |
|                                |                              |                    | 2   | 20,901,018            | intergenic        |           |             |                      |                       |                   | 1E-7            | [1]        |
|                                |                              |                    | 2   | 21,191,270            | intergenic        |           |             |                      |                       |                   | 3E-9            | [1]        |
|                                |                              |                    | 2   | 22,599,287            | intergenic        |           |             |                      |                       |                   | 4E-7            | [1]        |
| <i>DTNB</i>                    |                              | rs11684202         | 2   | 25,664,689            | intronic          |           |             |                      |                       |                   | 6E-6            | [1]        |
| <i>MYO3B</i> - <i>SP5</i>      |                              | rs2080401          | 2   | 170,684,313           | intergenic        |           |             |                      |                       |                   | 7E-6            | [1]        |
| <i>TNIK</i>                    |                              | rs11920719         | 3   | 171,116,770           | intronic          |           |             |                      |                       |                   | 4E-6            | [1]        |
| <i>SGCD</i>                    |                              | chr5:156378584     | 5   | 156,378,584           | intronic          |           |             |                      |                       |                   | 5E-9            | [3]        |
| <i>RNF130</i>                  |                              | rs13161895         | 5   | 180,044,201           | intronic          |           |             |                      |                       |                   | 4E-7            | [1]        |
| <i>PDGFD</i>                   |                              | rs10895547         | 11  | 103,937,424           | intronic          |           |             |                      |                       |                   | 3E-6            | [1]        |
| <i>PLEKHO2</i>                 |                              | rs12595292         | 15  | 64,861,491            | synonymous        | c.399G>A  | p.Lys133=   | np                   |                       |                   | 9E-6            | [1]        |
| <i>LITAF</i>                   |                              | rs7203193          | 16  | 11,547,324            | intergenic        |           |             |                      |                       |                   | 3E-6            | [1]        |
| <i>ZFXH3</i>                   |                              | rs16971384         | 16  | 72,897,186            | intronic          |           |             |                      |                       |                   | 5E-6            | [1]        |
| <i>DNM2</i>                    | <i>LDLR</i>                  | rs11671653         | 19  | 10,727,810            | intronic          |           |             |                      |                       |                   | 9E-7            | [1]        |
| <i>SMARCA4</i>                 |                              | rs11669133         | 19  | 10,981,463            | intronic          |           |             |                      |                       |                   | 1E-8            | [1]        |
| <i>SMARCA4</i> - <i>LDLR</i>   |                              | rs12151108         | 19  | 11,086,585            | intergenic        |           |             |                      |                       |                   | 2E-32           | [3]        |
| <i>LDLR</i>                    |                              | rs6511720          | 19  | 11,091,630            | intronic          |           |             | benign               |                       |                   | 7E-8            | [1]        |
| <i>APOE</i>                    | <i>APOE-C1-C2-C4</i>         | rs7412             | 19  | 44,908,822            | missense          | c.526C>T  | p.Arg176Cys | drug response        | probably damaging     | deleterious       | 1E-189;<br>2E-9 | [2][3]     |
| <i>LOC105373347</i>            |                              | rs5904726          | X   | 147,241,105           | intronic          |           |             |                      |                       |                   | 9E-6            | [1]        |

<sup>a</sup>Gene affected by the variant, or the closest genes in case of intergenic variants. <sup>b</sup>Identification in the dbSNPs database ([www.ncbi.nlm.nih.gov/snp](http://www.ncbi.nlm.nih.gov/snp)). <sup>c</sup>Positions are relative to genome assembly GRCh38. <sup>d</sup>Type of mutation. <sup>e</sup>Classification in the ClinVar database ([www.ncbi.nlm.nih.gov/clinvar](http://www.ncbi.nlm.nih.gov/clinvar)) of variants affecting coding regions: no interp., no interpretation; np, not present. <sup>f</sup>Prediction of the functional effect using PolyPhen ([genetics.bwh.harvard.edu/pph2/](http://genetics.bwh.harvard.edu/pph2/)). <sup>g</sup>Prediction of the functional effect using Sift ([sift.bii.a-star.edu.sg/](http://sift.bii.a-star.edu.sg/)).

**Table S1d:** SNVs associated with low-density lipoprotein cholesterol in Hispanic or Native-American ancestry populations.

| Mapped gene <sup>a</sup> | Region                | SNPid <sup>b</sup> | Chr | Position <sup>c</sup> | Type <sup>d</sup> | cDNA         | Protein     | ClinVar <sup>e</sup> | Polyphen <sup>f</sup> | Sift <sup>g</sup> | p-value | References |
|--------------------------|-----------------------|--------------------|-----|-----------------------|-------------------|--------------|-------------|----------------------|-----------------------|-------------------|---------|------------|
| <i>CELSR2</i>            | <i>CELSR2 - SORT1</i> | rs12740374         | 1   | 109,274,968           | 3'-UTR            | c.*919G>T    |             | association          |                       |                   | 1E-36   | [2]        |
| <i>CELSR2</i>            |                       | rs660240           | 1   | 109,275,216           | 3'-UTR            | c.*1167T>C   |             | np                   |                       |                   | 1E-28   | [1]        |
| <i>APOB</i>              | <i>APOB</i>           | rs13392272         | 2   | 20,994,618            | intergenic        |              |             |                      |                       |                   | 2E-12   | [1]        |
| <i>TDRD15, APOB</i>      |                       | rs7575840          | 2   | 21,050,618            | intergenic        |              |             |                      |                       |                   | 4E-18   | [2]        |
| <i>APOB, TDRD15</i>      |                       | rs562338           | 2   | 21,065,449            | intergenic        |              |             |                      |                       |                   | 3E-19   | [2]        |
| <i>ABCG8</i>             | <i>ABCG5/G8</i>       | rs4245791          | 2   | 43,847,292            | intronic          |              |             |                      |                       |                   | 5E-8    | [2]        |
| <i>HMGCR</i>             | <i>HMGCR</i>          | rs6882842          | 5   | 75,356,084            | intronic          |              |             |                      |                       |                   | 4E-6    | [2]        |
| <i>ZNF619P1</i>          |                       | rs6944635          | 7   | 46,132,286            | intergenic        |              |             |                      |                       |                   | 3E-6    | [2]        |
|                          |                       |                    | 11  | 61,781,553            | intronic          |              |             |                      |                       |                   | 6E-7    | [2]        |
| <i>DHODH</i>             |                       | rs8062895          | 16  | 72,014,733            | intronic          |              |             |                      |                       |                   | 3E-6    | [2]        |
| <i>PFAS</i>              |                       | rs4791641          | 17  | 8,257,831             | missense          | c.1100C>T    | p.Pro367Leu | np                   | benign                | tolerated         | 1E-8    | [1]        |
| <i>LDLR</i>              | <i>LDLR</i>           | rs6511720          | 19  | 11,091,630            | intronic          | c.67+2015G>T |             | benign               |                       |                   | 2E-18   | [2]        |
| <i>NCAN</i>              | <i>NCAN - TM6SF2</i>  | rs2238675          | 19  | 19,225,799            | intronic          |              |             |                      |                       |                   | 2E-8    | [1]        |
| <i>NECTIN2</i>           | <i>APOE-C1-C2-C4</i>  | rs7254892          | 19  | 44,886,339            | intronic          |              |             |                      |                       |                   | 2E-38   | [2]        |

<sup>a</sup>Gene affected by the variant, or the closest genes in case of intergenic variants. <sup>b</sup>Identification in the dbSNPs database ([www.ncbi.nlm.nih.gov/snp](http://www.ncbi.nlm.nih.gov/snp)). <sup>c</sup>Positions are relative to genome assembly GRCh38. <sup>d</sup>Type of mutation. <sup>e</sup>Classification in the ClinVar database ([www.ncbi.nlm.nih.gov/clinvar](http://www.ncbi.nlm.nih.gov/clinvar)) of variants affecting coding regions: no interp., no interpretation; np, not present. <sup>f</sup>Prediction of the functional effect using PolyPhen ([genetics.bwh.harvard.edu/pph2/](http://genetics.bwh.harvard.edu/pph2/)). <sup>g</sup>Prediction of the functional effect using Sift ([sift.bii.a-star.edu.sg/](http://sift.bii.a-star.edu.sg/))

**Table S1e:** SNVs associated with low-density lipoprotein cholesterol in Middle-East populations.

| Mapped gene <sup>a</sup>      | Region                | SNPid <sup>b</sup>          | Chr | Position <sup>c</sup> | Type <sup>d</sup> | cDNA      | Protein | ClinVar <sup>e</sup> | Polyphen <sup>f</sup> | Sift <sup>g</sup> | p-value | References |
|-------------------------------|-----------------------|-----------------------------|-----|-----------------------|-------------------|-----------|---------|----------------------|-----------------------|-------------------|---------|------------|
| <i>CELSR2</i>                 | <i>CELSR2 - SORT1</i> | rs7528419                   | 1   | 109,274,570           | 3'-UTR variant    | c.*521A>G |         | np                   |                       |                   | 5E-6    | [1]        |
| <i>TDRD15</i>                 | <i>APOB</i>           | rs70939068<br>(rs142138117) | 2   | 21,124,818            | intronic variant  |           |         |                      |                       |                   | 7E-8    | [1]        |
| <i>LOC105374317</i>           |                       | rs10183198                  | 2   | 21,248,115            | intronic variant  |           |         |                      |                       |                   | 5E-7    | [1]        |
| <i>INTS10, LPL</i>            | <i>LPL</i>            | rs10635970                  | 8   | 19,887,529            | A repetition      |           |         |                      |                       |                   | 2E-8    | [1]        |
| <i>RPL30P9, LPL</i>           |                       | rs7016880                   | 8   | 20,019,235            | intergenic        |           |         |                      |                       |                   | 5E-6    | [1]        |
| <i>C8orf37-AS1, LINC01298</i> |                       | rs62522646                  | 8   | 95,211,565            | intronic variant  |           |         |                      |                       |                   | 1E-7    | [1]        |
|                               |                       |                             | 19  | 11,165,580            | 3'-UTR variant    | c.*978A>G |         | np                   |                       |                   | 9E-8    | [1]        |

<sup>a</sup>Gene affected by the variant, or the closest genes in case of intergenic variants. <sup>b</sup>Identification in the dbSNPs database ([www.ncbi.nlm.nih.gov/snp](http://www.ncbi.nlm.nih.gov/snp)). <sup>c</sup>Positions are relative to genome assembly GRCh38. <sup>d</sup>Type of mutation. <sup>e</sup>Classification in the ClinVar database ([www.ncbi.nlm.nih.gov/clinvar](http://www.ncbi.nlm.nih.gov/clinvar)) of variants affecting coding regions: no interp., no interpretation; np, not present. <sup>f</sup>Prediction of the functional effect using PolyPhen ([genetics.bwh.harvard.edu/pph2/](http://genetics.bwh.harvard.edu/pph2/)). <sup>g</sup>Prediction of the functional effect using Sift ([sift.bii.a-star.edu.sg](http://sift.bii.a-star.edu.sg)).

**Table S1f:** SNVs associated with low-density lipoprotein cholesterol in Oceanian populations.

| Mapped gene <sup>a</sup> | Region               | SNPid <sup>b</sup> | Chr | Position <sup>c</sup> | Type <sup>d</sup> | cDNA      | Protein | ClinVar <sup>e</sup> | Polyphen <sup>f</sup> | Sift <sup>g</sup> | p-value | References |
|--------------------------|----------------------|--------------------|-----|-----------------------|-------------------|-----------|---------|----------------------|-----------------------|-------------------|---------|------------|
| <i>APOB - TDRD15</i>     | <i>APOB</i>          | rs754523           | 2   | 21,088,819            | intergenic        |           |         |                      |                       |                   | 6E-6    | [2]        |
| <i>ANKRD31, HMGCR</i>    | <i>HMGCR</i>         | rs7703051          | 5   | 75,329,662            | intergenic        |           |         |                      |                       |                   | 1E-8    | [1]        |
| <i>TOMM40</i>            | <i>APOE-C1-C2-C4</i> | rs1160985          | 19  | 44,900,155            | intronic          |           |         |                      |                       |                   | 2E-27   | [2]        |
| <i>APOC1</i>             |                      | rs4420638          | 19  | 44,919,689            | downstream        | c.*459A>G |         | no interp.           |                       |                   | 2E-7    | [1]        |

<sup>a</sup>Gene affected by the variant, or the closest genes in case of intergenic variants. <sup>b</sup>Identification in the dbSNPs database ([www.ncbi.nlm.nih.gov/snp](http://www.ncbi.nlm.nih.gov/snp)). <sup>c</sup>Positions are relative to genome assembly GRCh38. <sup>d</sup>Type of mutation. <sup>e</sup>Classification in the ClinVar database ([www.ncbi.nlm.nih.gov/clinvar](http://www.ncbi.nlm.nih.gov/clinvar)) of variants affecting coding regions: no interp., no interpretation; np, not present. <sup>f</sup>Prediction of the functional effect using PolyPhen ([genetics.bwh.harvard.edu/pph2/](http://genetics.bwh.harvard.edu/pph2/)). <sup>g</sup>Prediction of the functional effect using Sift ([sift.bii.a-star.edu.sg](http://sift.bii.a-star.edu.sg)).

#### Supplementary references for Afro-American or African ancestry populations

1. Lettre, G.; Palmer, C.D.; Young, T.; Ejebe, K.G.; Allayee, H.; Benjamin, E.J.; Bennett, F.; Bowden, D.W.; Chakravarti, A.; Dreisbach, A., et al. Genome-wide association study of coronary heart disease and its risk factors in 8,090 African Americans: the NHLBI CARE Project. *PLoS Genet* **2011**, *7*, e1001300, doi:10.1371/journal.pgen.1001300.
2. Rasmussen-Torvik, L.J.; Pacheco, J.A.; Wilke, R.A.; Thompson, W.K.; Ritchie, M.D.; Kho, A.N.; Muthalagu, A.; Hayes, M.G.; Armstrong, L.L.; Scheftner, D.A., et al. High density GWAS for LDL cholesterol in African Americans using electronic medical records reveals a strong protective variant in APOE. *Clin Transl Sci* **2012**, *5*, 394-399, doi:10.1111/j.1752-8062.2012.00446.x.
3. Gurdasani, D.; Carstensen, T.; Fatumo, S.; Chen, G.; Franklin, C.S.; Prado-Martinez, J.; Bouman, H.; Abascal, F.; Haber, M.; Tachmazidou, I., et al. Uganda Genome Resource Enables Insights into Population History and Genomic Discovery in Africa. *Cell* **2019**, *179*, 984-1002 e1036, doi:10.1016/j.cell.2019.10.004.

#### Supplementary references for Native American or Hispanic populations

1. Below, J.E.; Parra, E.J.; Gamazon, E.R.; Torres, J.; Krithika, S.; Candille, S.; Lu, Y.; Manichakul, A.; Peralta-Romero, J.; Duan, Q., et al. Meta-analysis of lipid-traits in Hispanics identifies novel loci, population-specific effects, and tissue-specific enrichment of eQTLs. *Sci Rep* **2016**, *6*, 19429, doi:10.1038/srep19429.
2. Andaleon, A.; Mogil, L.S.; Wheeler, H.E. Genetically regulated gene expression underlies lipid traits in Hispanic cohorts. *PLoS One* **2019**, *14*, e0220827, doi:10.1371/journal.pone.0220827.

#### Supplementary references for Middle-East populations.

1. Hebbar, P.; Abubaker, J.A.; Abu-Farha, M.; Alsmadi, O.; Elkum, N.; Alkayal, F.; John, S.E.; Channanath, A.; Iqbal, R.; Pitkaniemi, J., et al. Genome-wide landscape establishes novel association signals for metabolic traits in the Arab population. *Hum Genet* **2021**, *140*, 505-528, doi:10.1007/s00439-020-02222-7.

#### Supplementary references for Oceanian populations.

1. Burkhardt, R.; Kenny, E.E.; Lowe, J.K.; Birkeland, A.; Josowitz, R.; Noel, M.; Salit, J.; Maller, J.B.; Pe'er, I.; Daly, M.J., et al. Common SNPs in HMGCR in micronesians and whites associated with LDL-cholesterol levels affect alternative splicing of exon13. *Arterioscler Thromb Vasc Biol* **2008**, *28*, 2078-2084, doi:10.1161/ATVBAHA.108.172288.
2. Carlson, J.C.; Weeks, D.E.; Hawley, N.L.; Sun, G.; Cheng, H.; Naseri, T.; Reupena, M.S.; Tuitele, J.; Deka, R.; McGarvey, S.T., et al. Genome-wide association studies in Samoans give insight into the genetic architecture of fasting serum lipid levels. *J Hum Genet* **2020**, *66*, 111-121, doi:10.1038/s10038-020-0816-9.
